# Supplementary material
Source: PubMed Central journal article supplement (PMC4319976)
Supplement: NIHMS587158-supplement-Supplementary_Materials.pdf [file NIHMS587158-supplement-Supplementary_Materials.pdf]

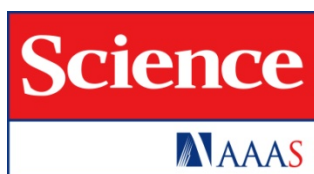

## Supplementary Materials for

### An Abundance of Rare Functional Variants in 202 Drug Target Genes Sequenced in 14,002 People

Matthew R. Nelson\*‡, Daniel Wegmann\*, Margaret G. Ehm, Darren Kessner, Pamela St. Jean, Claudio Verzilli, Judong Shen, Zhengzheng Tang, Silviu-Alin Bacanu, Dana Fraser, Liling Warren, Jennifer Aponte, Matthew Zawistowski, Xiao Liu, Hao Zhang, Yong Zhang, Jun Li, Yun Li, Li Li, Peter Woollard, Simon Topp, Matthew D. Hall, Keith Nangle, Jun Wang, Gonçalo Abecasis, Lon R. Cardon, Sebastian Zöllner, John C. Whittaker, Stephanie L. Chissoe, John Novembre†‡, Vincent Mooser†

\*† These authors contributed equally to this work

‡correspondence to: [matthew.r.nelson@gsk.com](mailto:matthew.r.nelson@gsk.com); [jnovembre@ucla.edu](mailto:jnovembre@ucla.edu)

#### **This PDF file includes:**

Materials and Methods  
Supplementary Text  
Figs. S1 to S15  
Tables S1 to S17  
Captions for databases S1 to S3

#### **Other Supplementary Materials for this manuscript includes the following:**

Databases S1 to S3 as zipped archives: S1, target regions of sequenced genes; S2, variants and their annotations; S3, European site frequency spectra.

## Materials and Methods

### Sample

The study sample of 14,002 individuals included 10,621 individuals from 12 case-control studies of common disease and 3,381 individuals from two population samples (table S4). Cases were selected from 12 common disease collections: coronary artery disease, metabolic syndrome, multiple sclerosis, osteoarthritis, rheumatoid arthritis, irritable bowel syndrome, epilepsy, Alzheimer's disease, unipolar depression, bipolar disorder, schizophrenia and chronic obstructive pulmonary disease. Population controls were included from two samples: CoLaus from Lausanne, Switzerland and LOLIPOP from London, UK, both having extensive cardiovascular trait measurements and the former including extensive psychiatric assessments. The two CEU and YRI trios sequenced at high depth by the 1000 Genomes Project (30) were also included. In total, 14,204 unique samples and 143 randomly selected sample duplicates were prepared for sequencing. The primary selection criteria applied to each study was the availability of at least 10 µg of DNA with a concentration at least 195 ng/µl from a primary blood sample. An overview of the samples selected from each collection is included below.

**CoLaus Study.** A population-based study of 6,188 European white subjects aged 35-75 years drawn from Lausanne Switzerland, through the CHUV University Hospital (31). Subjects included in the current study include 1,774 participants in the follow-on study of psychiatric traits (PsyCoLaus) (32) and 772 extremes of several selected cardiovascular disease-associated traits. There was an overlap of 460 subjects between these two selections.

**LOLIPOP Study.** A population-based study of 21,915 subjects, primarily of Indian Asians and Northwestern Europeans aged 35–75 years, identified from the lists of 58 general practitioners in West London (33). Subjects included in the current study include a random selection of 499 Indian Asians, 400 European whites selected for overlap with previous genome-wide genotyping studies, 149 European whites selected as extremes from several cardiovascular disease-related traits and 285 subjects of other non-European ancestry.

**Metabolic Syndrome GEMS Study.** The GEMS Study of Metabolic Syndrome and related traits included two types of samples; families and a set of unrelated cases and controls. Families (3,384 individuals from 535 families) were recruited from six study sites located in Australia, Canada, Finland, Switzerland, Turkey and the United States. Eligible families consisted of a minimum of two siblings (an affected sib-pair) with atherogenic dyslipidemia (ADL). In the case-control arm, a set of approximately 1,000 cases with ADL and 1,000 normolipidemic controls were recruited from the same GEMS sites. Details of the recruitment procedures, subject characteristics, and inclusion/exclusion criteria for both the family and case control studies have been previously described (34, 35). The current study includes 1,570 unrelated cases and controls and 30 parent-offspring trios for assessing sequence data quality, selected from all sites except the US and Turkey.

**Coronary Artery Disease (CAD) MedStar Study.** A premature CAD collection designed to investigate the genetics of plaque stability in acute coronary syndrome (ACS). The full study is comprised of 452 ACS CAD cases, 491 non-ACS CAD cases, and 483 non-CAD controls (36). Subjects were identified prospectively from the patient population of Cardiovascular Research Institute (MedStar/Washington Hospital Center). Standard criteria were used to identify cases with myocardial infarction and cases diagnosed with clinically significant coronary atherosclerosis without myocardial infarction. Subjects included in the current study include a selection of 609 ACS and non-ACS CAD cases.

**Osteoarthritis GOGO Study.** A large multicenter family-based study of 1,155 families from 5 United States and 2 United Kingdom sites with multiple joint osteoarthritis characterized both clinically and radiographically (37). The current study includes 836 cases.

**Irritable Bowel Syndrome Study.** A population-based study of 678 cases and 539 controls from 3 recruitment sites in Canada and the United States. Deeply phenotyped cases with a history of irritable bowel syndrome (IBS) for at least 6 months confirmed by a physician and according to the Rome II criteria and either a colonoscopy/barium enema with normal results supporting IBS diagnosis. Controls were matched to IBS cases and had no previous IBS diagnosis. The current study includes 317 cases.

**Genetics of Rheumatoid Arthritis (GORA) Study.** Patients with rheumatoid arthritis were recruited from Sheffield, United Kingdom, as described previously (38). Cases (~1,000) were of Northern European descent and all fulfilled the 1987 American College of Rheumatology classification criteria. A similar number of healthy controls were recruited. The current study includes 615 cases.

**Multiple Sclerosis geneMSA Study.** A study of 1,005 multiple sclerosis (MS) cases and 1,012 matched controls primarily of European ancestry from three sites in the United States, the Netherlands and Switzerland (39). The current study includes 673 cases.

**Multiple Sclerosis African American Study.** A study of African American cases and controls with subjects recruited from 39 states (40, 41). Cases were characterized through a systematic medical record review. Controls were invited to participate in the study by the probands and constitute primarily non-consanguineous spouses or friends of MS patients. All study participants were self-reported African-Americans and ancestry was documented based on genotyping results of 186 informative SNPs (42). The current study included 340 cases and 260 controls.

**Epilepsy HitDIP Study.** A study of 719 cases and 687 controls recruited from Norway and Finland. All patients had a definite diagnosis of epilepsy according to International League Against Epilepsy (ILAE) definitions. Controls had no neuropsychiatric conditions (43). The current study includes 185 Finnish cases.

**Epilepsy GenEpa Study.** A study of 318 cases and 348 controls from Swiss Epilepsy Centre, Zurich (43, 44). All patients had a definite diagnosis of epilepsy according to ILAE definitions. Controls had no neuropsychiatric condition. The current study includes 125 cases.

**Alzheimer's Disease genADA Study.** Study includes individuals with Alzheimer's disease (AD) diagnosed by the National Institute of Neurological and Communicative Diseases and Stroke/ Alzheimer's Disease and Related Disorders Association criteria. Subjects were recruited from nine memory referral clinics in Canada (45). The current study includes 705 cases.

**Unipolar Depression Study.** A study of 1,000 cases recruited from three ascertainment sites in Southern Germany (Munich, Augsburg and Ingolstadt) and 1,029 controls ascertained by the Max Plank Institute of Psychiatry in Munich. Cases diagnosed with recurrent major depressive disorder and controls were age and gender-matched non-affected controls (46). The current study includes 775 cases.

**Schizophrenia Study.** A study of approximately 1,600 cases and 850 controls collected from four sites in Aberdeen, UK, Greenock, UK, Munich, Germany and Quebec City, Canada. Cases were diagnosed with schizophrenia according to DSM-IV or ICD-10 criteria and healthy volunteers were randomly selected from the general population (47). The current study includes 1,109 cases.

**Bipolar Disorder Study.** A study of 965 bipolar cases and 933 controls from a multicenter study subjects of European ancestry from three different sites the Centre for Addiction and Mental Health in Toronto, Canada, the Institute of Psychiatry in London, UK and the University of Dundee, UK. Each case was assessed when euthymic and was diagnosed (lifetime) with the DSM-IV/ICD-10 bipolar I or bipolar II disorder (47). The current study includes 786 cases.

**Chronic Obstructive Pulmonary Disease ECLIPSE Study.** ECLIPSE (Evaluation of COPD Longitudinally to Identify Predictive Surrogate End-points) is a three-year non-interventional longitudinal study being conducted at 46 centers in 12 countries and is comprised of clinically relevant COPD cases with Global Initiative for Chronic Obstructive Lung Disease (GOLD) stage 11\_IV COPD with a number of smoking and non-smoking and non-disease controls (48). The current study includes 1,002 cases from ten countries. Samples from the New Zealand site were excluded.

**COPD HitDIP Study.** A study of approximately 1,000 cases and 1,000 controls from Bergen, Norway. Cases consist of  $\alpha$ 1-antitrypsin deficiency-negative individuals with moderate to severe COPD according to GOLD criteria. (49). The current study includes 782 cases.

### Informed consent

All study participants in the component studies provided written informed consent for the use of their DNA in genetic studies. A careful review was conducted to verify that the consents were consistent with the activities of this study. In selected instances further Institutional Review Board approval was sought and obtained where the appropriateness of the informed consent for the current study was not clear.

### Self-reported ancestry information

We assigned each sampled individual to one of four ancestry groups: African-American (N = 594), European (N = 12,514), Southern Asian (N = 566, mostly from India) and other (N = 327) based of self-reported ancestry. Europe was further subdivided into eight geographic regions. These groupings do not reflect discrete structure in the data, rather the practical need to create sub-groups with reasonable sample sizes for more detailed analyses.

The demographic information available was variable across subjects. The most complete information contained self-identified ethnicity, country of birth and first language for the subject, two parents and four grandparents. Based on this information, we first attributed a best-guess geographic label to each of the family members based on the following rules: 1) missing data was ignored; 2) if ethnicity conflicted with birthplace or first language data, only ethnicity was considered; 3) if birthplace and first language disagreed, a higher level container label was chosen (e.g. an individual who was born in France but reported his first language to be Norwegian was labeled European); and 4) white individuals born in the US or Canada were attributed according to the first language information alone, if other than English. The geographic label for a sampled individual was then based upon the labels attributed to 1) the four grandparents, 2) two grandparents and one parent, 3) the two parents, or 4) the individual, based upon data availability. Conflicting labels of ancestors resulted in an attribution to a higher level label.

We divided Europe into geographic groups based on the UN geo-scheme for Europe, which has the four regions UN Northern, UN Western, UN Southern and UN Eastern Europe. We then further subdivided the regions with more than 500 individuals sampled (all but UN Eastern

Europe). UN Northern Europe was split into North-Western Europe (Great Britain & Ireland) and Northern Europe, which includes all other UN Northern countries but Finland. The Finnish population is known to be unique in its genetic diversity due to a strong, recent population bottleneck (23) and was thus treated as an independent unit. UN Western Europe was split into Western Europe (Belgium, France, Luxembourg, and the Netherlands) and Central Europe (Austria, Germany, and Switzerland). Finally, UN Southern Europe was split into South-Western Europe (Spain, Portugal, and Andorra) and South-Eastern Europe (all others). See table S10 for the European regions considered and the number of samples per group.

### Target genes

The overriding objective of the experiment was to characterize a selection of target genes of interest to GlaxoSmithKline and conduct genotype-phenotype association analysis to identify potential drug repositioning opportunities (50, 51). Genes were selected from drug target genes across the pipeline, and for scale and feasibility reasons, was limited to 202 genes. The selected genes included 12 genes encoding targets of currently marketed drugs (Phase IV), 44 genes encoding targets of drugs which had been terminated after administration to humans (Phases I-III), and 76 genes encoding targets of drugs under active clinical development (Phases I-III). Drugs known to target multiple genes were omitted. In addition, 70 genes encoding targets of interest for pre-clinical development were included. The names and sequence characteristics of the genes are presented in table S1. The non-overlapping target regions are provided in database S1.

We compared several characteristics of the 202 genes selected in this study to the rest of the protein coding genome defined by GENCODE release 6 (52). There were 20,593 total protein coding GENCODE genes and 20,369 that overlapped with Ensembl Genes version 61 in GRCh37.p2. Of those, there were Gene Ontology terms (53) available for 20,340 genes downloaded from Ensembl BioMart on February 2, 2011 with a median length of 1,434 bp. The genes selected for this study had significantly longer coding regions than the rest of the coding genome, with medians of 1,756 and 1,434 bp, respectively (Wilcoxon  $p = 7.2 \times 10^{-5}$ ).

The genes in this study differed from the rest of those in the genome in several common Gene Ontology terms (table S2). Significant terms were selected that were present in at least 5% of genes, either in GENCODE overall or within the study genes, and the differences in frequencies were statistically significant ( $p$ -value  $< 0.01$  here). There were 16 cellular component terms that differentiated the set of genes under study, including substantial enrichment for proteins locating to the external side of the plasma membrane, membrane raft, integral to the plasma and postsynaptic membranes (all with odds ratio [OR]  $> 10$ ). The study genes were significantly enriched for 27 different biological processes, including positive regulation of peptidyl-tyrosine phosphorylation, elevation of cytosolic calcium ion concentration and chemotaxis (OR  $> 15$ ). There were 12 molecular functions that differed significantly between the two gene sets, including enrichment for G-protein coupled receptor activity, ion channel activity, receptor activity and cytokine activity (OR  $> 6$ ) and a near absence of nucleic acid binding genes (OR = 0.08). These characteristics (table S2) that differentiate the genes in this study from the genome overall are expected for genes encoding drug targets.

### **Comparison of nonsynonymous:synonymous ratios with the protein-coding genome.**

Analysis of the number of sites at which sequenced subjects carried non-reference nonsynonymous (NS) alleles were fewer than expected based on projections from the 1000 Genomes Project pilot (30), as described in the main text. To determine if this could have been

due to experimental differences in the studies or differences in the rates of NS variants in the selected drug target genes, we assessed the ratio of nonsynonymous:synonymous (NS:S) variant alleles carried by each CEU subject using the published genotypes from the low coverage genome-wide 1000 Genomes Project sequence data, CEU.low\_coverage.2010\_09.genotypes.vcf.gz, accessed from [ftp://ftp-trace.ncbi.nih.gov/1000genomes/ftp/pilot\\_data/paper\\_data\\_sets/a\\_map\\_of\\_human\\_variation/low\\_coverage/snps](ftp://ftp-trace.ncbi.nih.gov/1000genomes/ftp/pilot_data/paper_data_sets/a_map_of_human_variation/low_coverage/snps) on March 15, 2011. Annotation of NS and S variants was obtained from [ftp://ftp.1000genomes.ebi.ac.uk/vol1/ftp/pilot\\_data/technical/working/20100511\\_snp\\_annotation](ftp://ftp.1000genomes.ebi.ac.uk/vol1/ftp/pilot_data/technical/working/20100511_snp_annotation) on March 15, 2011.

The results, shown in fig. S9, demonstrate that NS:S differs dramatically between the drug target genes in this study compared to the rest of the coding genome. To compare how different these genes are from other genes associated with human health and disease, we repeated this analysis using the genes reported from genome-wide association studies from the NHGRI Catalog of Genome-wide Association Studies (N = 3,736) (22), accessed on March 18, 2011, genes included in OMIM (N = 1,895), prepared as described below, and genes involved in drug absorption, distribution, metabolism and excretion (ADME; see <http://www.pharmaadme.org> for the gene listing; N = 299). We similarly found lower ratios in these selected genes, though not to the extent observed amongst the selected drug target genes.

#### DNA sequencing

DNA libraries were prepared from each sample by fragmenting 3 µg of genomic DNA to around 200 bp, followed by the addition of an 8 bp index sequence to each end to uniquely identify each sample and quantified in preparation for combining into 48-sample pools. Coding and noncoding exon boundaries were obtained via an Ensembl BioMart query of human genes against NCBI genome build 36.3. Fifty bases of flanking sequence were added, covering a total of 863,883 bases. The target gene regions were enriched for sequencing using a custom Roche (Madison, Wisconsin, USA) Nimblegen HD2.1M sequence capture array. Amplification of the eluted libraries was carried out with 12 PCR cycles. Loading volumes were determined by qPCR. Paired end sequencing was conducted for each 48-sample indexed pool on a single Illumina (San Diego, CA, USA) Genome Analyzer 2x lane. Over 93% of target bases were successfully sequenced in at least half of the study samples. The median sequencing depth was 27×.

#### SNP calling

Paired-end short reads were aligned with SOAP (54) and variants were called using SOAPsnp (55). Candidate SNV sites were identified for each sample where a genotype including non-reference allele was called with a minimum sequencing depth of four, a minimum consensus quality of 20 and no other SNV satisfying these criteria located within four base pairs in the same sample. Candidate SNVs were aggregated across all sequenced samples and consensus genotypes were called at these bases on each sample that had a minimum depth of seven and a minimum consensus quality of 20. There were a total of 50,432 such candidate variant sites identified. Additionally, variants were excluded if 1) singleton heterozygote variants had less than ten reads (N = 1,158), 2) fewer than 50% of sequenced subjects yielded a successful genotype (N = 1,373), or 3) duplicate genotype discordance was greater than 2% (N = 226). Samples were excluded from analysis if 1) their average sequencing depth was less than 10, 2) sequence-based genotypes were more than 15% discordant with genome-wide panel

genotypes (possible for 9,346 samples that had previous genotype data available to exclude possible sample mix-ups) or 3) the sample was sequenced multiple times and had lower average sequencing depth.

#### Missing genotype rates

Overall, missingness increased with allele frequency. Common variants ( $MAF > 0.05$ ) had a median missing genotype rate of 2.1% compared to variants with  $MAF \leq 0.001$  with median missing rates less than 0.7%. As expected, we found a strong relationship between the distance of a sequenced base from the end of the target region and the subsequent depth, quality and missing genotype rates, as illustrated in fig. S10. Average sequencing depth is at its greatest approximately 100 bases from the end of the target region, and hence will generally have higher average genotype data quality and lower missing genotype rates. Hence it is more likely that rare variants will be missed (false negative) near the exon boundaries (50 bases from target start) than those that are further interior to the exon.

#### Transition:transversion ratios

The ratio of SNVs caused by transitions to transversions provides a qualitative assessment of the false positive rate as transition mutations are more than twice as common as transversions, whereas the two are equally likely as a result of sequencing errors. The transition:transversion ratios in our data are shown in table S11 for all variants, singletons, doubletons and a subset of the highest quality variants ( $MAF > 0.1\%$  and missing less than 10% of genotype calls). The ratios are shown separately for NS, S, UTR and intronic SNVs as the expectations can differ markedly between variants of different types, particularly for S SNVs. Overall, the ratios are consistent with a high sequence data quality, though they are noticeably lower for singletons compared to doubletons and the highest quality variants.

#### Proximity to known insertions and deletions

The presence of insertions or deletions (indels) can result in incorrectly calling SNVs with calling algorithms that do not simultaneously carry out local realignments around known or suspected indels, as is the case for SOAPsnp in this study. We assessed the impact of this on variant quality of SNVs located around indels reported by the recent whole-genome sequencing of 179 individuals by the 1000 Genomes Project (30). The distance of each SNV to the nearest indel was calculated, where a distance of zero was given for variants located at or between the two reference bases spanning known indels, or the number of bases from those flanking positions.

Of 245 indels reported by the 1000 Genomes Project located within target regions, 206 included one or more SNVs located within 20 bases. There was a substantial excess of SNVs located within indel regions, a total of 150 SNVs within 106 unique indels, compared to surrounding SNVs (fig. S11). The majority of these are located within the UTR (96) and intronic (46) compared to coding (5) regions owing to the dearth of common coding indels. The average depth, quality and duplicate concordance of SNVs called within or near indels were significantly lower than those more distant. This pattern was noticeable for SNVs up to ten bases away. Similarly, transition:transversion ratios were significantly lower for the 267 SNVs within five bases of known indels, but indistinguishable for SNVs more distant. These 267 SNVs represent less than 1% of all variants observed, and only 0.2% (15) of NS SNVs. Although these results

emphasize the value of local realignment around known or suspected indels for genotype calling, they would have a minimal impact on the inferences of this study.

#### Determination of sequencing accuracy

**Duplicate concordance.** DNA samples from approximately one percent of subjects included in this study were randomly selected to be sequenced in duplicate. Duplicate samples were placed on separate microtiter plates and subsequently sequenced in separate indexed pools. We evaluated the duplicate sequence of 130 samples that passed subject-level quality control. We tabulated the number of discordant genotypes between duplicate pairs and estimated the overall and heterozygote discordance rates as well as the underlying error rates via maximum likelihood that gave rise to them (56). Table S12 contains counts of concordant and discordant genotypes for all variable base positions and stratified by whether the variant is included in dbSNP (release 126). Amongst singleton variants with genotypes called in both sample duplicates, 204 were observed to be heterozygous in both duplicates whereas 3 were heterozygous in only one. This gives a singleton duplicate heterozygous discordance rate of 0.015. Corresponding estimates of genotype error rates, assuming a single-allele error model (i.e. excluding the possibility that a genotype homozygous for one allele could be called as homozygous for another allele) are presented in table S13. The duplicate concordance reported here follows the exclusion of 226 SNVs with overall discordance rates  $>2\%$ , which is only possible for variants with  $MAF >1\%$  (at least 2% heterozygous calls). Most excluded variants were quite common. As a result, the error rate estimate for common variants is somewhat biased downward. However, independent methods (see below) were applied to further characterize the variant calling and genotype data quality.

**1000 Genomes Project concordance.** We included the CEU and YRI trios that were sequenced to high depth in pilot 2 of the 1000 Genomes Project (30) in this study to allow direct comparison of variants and genotypes called in independent experiments. We relied on the conservative genotype calls provided by the 1000 Genomes Project, that included only variants that passed stringent quality criteria, including Mendelian segregation, and had genotypes that were concordant between Broad and University of Michigan Genotype calls (30). Of these, there were 658 and 854 variants with genotype calls from both studies in the CEU and YRI samples, respectively. The genotype confusion table is shown in table S14. Combining the results from the two trios, we estimated an overall discordance rate of 0.42% and a heterozygote discordance rate of 0.95%. Although the overall discordance rate is strongly influenced by the frequencies of the variants available for comparison, the heterozygote discordance rate can be directly compared to the within-study duplicate heterozygote discordance rate described above. We find the two to be nearly identical at 0.95% versus 0.92%, respectively. No singleton discordances were observed.

**Mendel errors.** Thirty parent-offspring trios from the GEMS collection were sequenced. An analysis of genotype transmission patterns identified 37 Mendel errors involving 35 SNVs from 22 trios with one to three errors per pedigree. 32 of 37 errors involved homozygous parents and a heterozygous child. The SNVs involved were predominantly common, 24 of 35 with  $MAF$  greater than 0.5%. One singleton (of 21 carriers; 4.8% with exact 95% confidence interval = 0.12 to 24%) and no doubleton (of 73 carriers) variants resulted in Mendel errors. The overall genotyping error rate estimated from the Mendelian errors, from among 2,256 SNVs polymorphic in this sample of pedigrees, was estimated to be 0.06% using the method of Saunders et al. (57).



**Capillary sequence concordance of singletons.** Data from two standard Sanger capillary sequencing experiments were available to assess the singleton false discovery rate in this study. In the first, 985 of the subjects included in this study were sequenced in eight overlapping genes — *GPR119*, *GPBAR1*, *MLNR*, *PLA2G7*, *SIRT1*, *SIRT2*, *SIRT3* and *SIRT6* — covering approximately 10,000 coding and 24,000 noncoding bases. All amplicons were sequenced in both directions under standard conditions and resolved on ABI 3730xl automated sequencing instruments. Amplicons that passed quality control were analyzed to identify single base differences relative to the NCBI 36.3 reference sequence using PolyPhred v.5.04 and v.6.0. Genotype calls for all subjects at each coding variant position were manually reviewed. Sequencing, variant calling and manual review was carried out at Beckman Coulter Genomics (Danvers, MA).

We observed 40 singleton SNVs amongst the 985 subjects within the overlapping sequenced regions from the SOAPsnp data in the current study. When matched against the capillary sequencing results we found 35 of 40 SNVs were called heterozygous by both methods. All 22 of the coding singletons in the current study, subjected to manual review for genotype calling, were completely concordant between the two methods. Of the five remaining singleton SNVs that were not identified by the automated genotype calling software from the capillary sequence data, three were not successfully sequenced, one was found to show a clear double peak corresponding to the heterozygous genotype called in this study and one was undetermined (the read on one strand appeared clearly heterozygous while the other strand homozygous). Thus, of 37 singleton genotypes available for independent validation none were found to disagree between the two forms of sequencing, including two singleton trialleles.

In a second experiment specifically designed to assess the accuracy of the singleton calls from the short read sequence in this study, we randomly selected 125 singleton variants found amongst the 2,059 sequenced CoLaus subjects. As a typical capillary sequencing reaction would capture approximately 450 bases, we further identified any additional singleton variants carried by CoLaus subjects located within 200 bases of the randomly selected singleton. From among these variants we selected 225 singleton variants, sequencing three subjects for each singleton region. This design provided two negative controls (homozygous for the reference allele) and one heterozygous carrier for each singleton variant. Oligonucleotides were ordered from IDT (Integrated DNA Technologies, Coralville, Iowa). PCRs were set up using ABI GeneAmp FastPCR Master Mix (Applied Biosystems, Foster City, CA), and DNA sequencing reactions were set up using ABI BigDye Terminator v3.1 (1:10). Sequencing products were purified using CleanSEQ paramagnetic beads (Agencourt, Beverly, MA) automated on the Beckman FX (Beckman Coulter, Brea, CA) and sequenced on the ABI 3730xl DNA Analyzer. Sequence chromatograms were edited and aligned to the human genomic reference sequences using Sequencher (GeneCodes, Ann Arbor, MI) (v4.9) software. Secondary peak detection threshold was set as a minimum of 20 percent of major peak height to detect heterozygous peaks, and alleles were confirmed by automated and visual peak inspection for each polymorphism location.

Of the 225 sequencing reactions attempted, 15 failed. Of 210 successfully sequenced singleton carriers, six expected heterozygotes were found to be homozygous reference. All eight triallelic variants called with SOAPsnp were validated. Combining these results with those above from eight genes, capillary sequencing validated 240 out of 245 singletons identified in this study. The estimated false discovery rate is 2.0% with a 95% confidence interval of 0.7% to 4.7% (Pearson-Klopper exact method implemented from the binom package in R (58)). There

were no instances of calling non-reference homozygotes at singleton positions in the non-carriers from this study.

**False negative rates.** There are several potential reasons why true variants and variant carriers may be missed, including low genotype call rates at a variant site or genotyping errors that may result from allele-specific amplification biases, errors in short read sequence alignment, or other biases against calling non-reference alleles inherent in the genotype calling method employed here. The first source of false negatives is expected to disproportionately affect very rare variants, as there is a greater chance that they would be among the variants overlooked due to reduced genotype call rates. We approached assessment of this source by examining the relationship between SNV rates (number of SNVs observed per bp of sequence) over a range of call rates (fig. S12). Assuming that the false negative rate would be negligible amongst bases with call rates >95%, we used this subset of bases comprising 84% of all sequenced bases (>660 kb) to estimate the expected SNV rate. The SNV rate clearly decreases with decreasing call rates, though less than 4% of sequenced bases (passing the 0.5 call rate QC threshold) fall below 80% call rates where a significant drop in the SNV rate is observed. As expected, most of the undercalling is attributable to missed singletons (fig. S12B). Overall, we estimate that only 1.02% of all and as many as 2.72% of singleton variant sites were uncalled due to missing genotypes.

Other sources of uncalled variants can be difficult to identify and quantify. We carefully reviewed the capillary sequence data from the coding regions in eight genes described above. Of the bases that were successfully sequenced in this experiment, we identified 52 singleton variants carried by one of the 985 sequenced subjects. Of those, four were not identified among the SOAPsnp genotypes of the same subjects. One was due to an uncalled genotype (depth = 7, quality = 19; failing QC on both measures), in line with the expectations estimated in the previous paragraph. The remaining three show strong support in the capillary sequence traces, but no indication of the presence of the indicated allele in the short read data, in spite of high read depth (19, 32 and 76×) and genotype quality (91, 99 and 99). With both sources of data of such high quality, the true genotype cannot be determined. Assuming these are true singleton variants, the estimated false negative rate is 7.7%, though with fairly low precision (95% exact CI = 2.1-18.5%). In contrast, for the SNVs found in common between the capillary and short read sequence data, the probability of calling a reference homozygote in the short read data given a subject was found to be heterozygous by the capillary sequence data is 1.3% (28 of 2194 heterozygotes, 95% exact CI = 0.85–1.8%). This smaller value and non-overlapping confidence intervals suggests that some polymorphic sites may fail to be identified due to genomic context that may affect sequencing, alignment, and genotype calling.

### SNP annotation

A substantial fraction of exonic SNPs will exert their effects on the protein function by altering protein structure. Starting with a table of NCBI build 36.3 SNP coordinates and annotation from the SNP calling pipeline, a Perl-based high-throughput protein analysis pipeline was developed to automate the use of two functional prediction tools. The primary output was a table of annotations containing the PolyPhen (59) and SIFT (60) predictions for the NS SNPs and the Ensembl consequence prediction for all SNPs.

The first step of the pipeline converted the build 36.3 SNP coordinates to those of NCBI build 37 using the Ensembl API (61). The build 37 SNP coordinates, reference base pair and mutation base pair were then used to query the SIFT web site. The next steps were required to

generate a list of UniProt identifiers and the residue changes as input for the PolyPhen program. For each SNP the Ensembl API was used to output the corresponding prediction and also a 200 bp RNA flanking sequence of SNP coordinates from all Ensembl transcripts which could contain that SNP. The RNA flanking sequence was aligned against UniProt protein sequences using BLAST. These alignments allowed the automated determination of the corresponding protein and any amino acid residue changes. Inconsistencies were automatically flagged for manual checking, for example synonym mismatches between the UniProt/HUGO Gene Symbol and the Gene Symbol provided by the SNP calling pipeline, alignments to gap regions (indicating alternative transcripts) and for mutations that would affect an existing start codon. Neither PolyPhen nor SIFT accounted for mutations in start codons. PolyPhen input files were generated containing the UniProt identifier, the amino acid residue position and the reference and mutant amino acid residues; the canonical amino acid residue found in the UniProt protein was used for the analysis even when it differed from that predicted by the build 37 reference genome. The PolyPhen input files were then submitted to the PolyPhen server grid via the PolyPhen Perl interface in batches of up to 50 residue changes at a time. The results were then extracted via the PolyPhen Perl interface and combined into a single file.

The final step in the process was to aggregate the Ensembl consequence predictions, warnings, the PolyPhen predictions and the SIFT predictions together with the original annotations. We note that our methods did not include all possible transcripts and protein isoforms, but rather the canonical forms.

The 46-way placental alignment phyloP conservation scores (62) were retrieved from the UCSC Genome archive (<http://hgdownload.cse.ucsc.edu/goldenPath/hg19/phyloP46way/>) on October 10, 2010. Genome build 37 chromosome positions were converted to NCBI build 36 using the Ensembl API.

We assessed which variants were novel based on the overlap with dbSNP and 1000 Genomes Project variants. Overlapping variants were found by use of the SeattleSeq Annotation server (<http://gvs.gs.washington.edu/SeattleSeqAnnotation/>) using dbSNP build 131 and 1000 Genomes variants released in March 2010 using NCBI build 37 reference positions.

### Triallelic variants

In total we found 745 triallelic and 12 tetraallelic sites, which corresponds to 2% of all variable sites to include at least a third allele. As expected, the rarest allele at most multi-allelic sites was usually very rare, seen only once or twice in 99% of instances. The expected number of triallelic variants increased almost linearly with sample size, reaching 1.2-1.9 variants per kilobase, depending on functional class (fig. S2).

Here we explored two complementary approaches to better characterize to what extent this observation is influenced by genotyping errors. First, we computed a liberal upper bound on the fraction of positions at which we expected to see a third allele based on known genotyping error rates from the duplicate analysis (see above). In addition, we assessed the expected number of triallelic sites expected given the observed mutation rate.

**Expected tri-alleles due to genotyping error.** As reported earlier, the rates of genotyping errors depend on the underlying genotype. We therefore computed the probability that a third allele is inferred due to genotyping error at a site by weighting the different error rates assuming Hardy-Weinberg equilibrium. Let us denote by  $N_l$  the total number of individuals successfully genotyped at locus  $l = \{1, \dots, L\}$  and by  $r_l$  and  $n_l$  the frequencies of the reference and non-

reference alleles at locus  $l$ , respectively. The fraction  $f$  of bi-allelic sites wrongly inferred as triallelic sites was then estimated as

$$f = \frac{1}{L} \sum_{l=1}^L N_l \left( 1 - (r_l^2(1 - \varepsilon_{RR}) + 2r_l n_l(1 - \varepsilon_{RN}) + n_l^2(1 - \varepsilon_{NN})) \right),$$

where the sum runs over  $L$  bi-allelic sites observed in the data sets and the genotyping error rates that lead to a calling a third allele are denoted by  $\varepsilon_{RR}$ ,  $\varepsilon_{RN}$  and  $\varepsilon_{NN}$ , depending on the underlying true genotype homozygous reference (RR), heterozygous (RN) and homozygous non-reference (NN), respectively.

We obtained estimates of genotyping error rates from individuals for whom duplicates were sequenced (see above). A key observation was that error rates to miscall both alleles of an individual (for instance, calling a NN genotype RR) are virtually zero and we are ignoring such errors in the following. The rate at which a reference homozygous genotype (RR) is wrongly called heterozygous (RN or Rx) was also directly estimated from the duplicate analysis at  $2.36 \times 10^{-11}$ . However, assuming a transition:transversion ratio of 2:1 (which SOApsnp does), on average only 7/12 of such errors lead to a third allele. We thus assumed  $\varepsilon_{RR} = 1.38 \times 10^{-11}$ . For the other two error rates ( $\varepsilon_{RN}$  and  $\varepsilon_{NN}$ ) the error rates inferred from the duplicate analysis serve as liberal upper bounds. For instance, due to the strong reference bias of SOApsnp, the rate at which homozygous non-reference genotypes (NN) are called heterozygous (RN) is much larger than the rate at which the same genotype is called heterozygous with a new non-reference allele (Nx). A liberal approach is thus to assume  $\varepsilon_{NN} = \frac{7}{12} 8.34 \times 10^{-5} = 1.45 \times 10^{-5}$ . Given that the most common error at heterozygous genotypes is to call a homozygous genotype instead, we assumed  $\varepsilon_{NN}$  serves as a liberal upper bound on  $\varepsilon_{RN}$  and thus assume  $\varepsilon_{RN} = \varepsilon_{NN}$ .

Based on those error rates, a liberal upper bound of the expected fraction of diallelic sites at which a third allele is observed due to error was estimated at 0.8%. This strongly suggests that a considerable fraction of the 2% polymorphic sites observed to be triallelic are not due to genotyping error.

**Expected tri-alleles due to repeated mutation.** A complementary approach is to estimate the fraction of polymorphic sites that are expected to be triallelic given the observed mutation rate. We assumed that the number of mutations  $M$  falling on the coalescent tree for a given site is Poisson distributed such that

$$P(M = k) = \frac{e^{-\lambda} \lambda^k}{k!}.$$

Then we could estimate  $\lambda$  using the proportion of monomorphic sites we observed ( $\sim 20/21$ ) obtaining  $\lambda = -\ln\left(\frac{20}{21}\right) = 0.0487$ . Here we assumed a homogenous mutation rate across the whole sequence. The true mutation rate at polymorphic sites is likely to be above average, and hence this approach will slightly underestimate the expected fraction of triallelic sites.

We now derived the probability that a given site is triallelic. Due to the very small probability that  $M > 2$ , we assumed triallelic sites arise only when  $M = 2$ , in which case the site may be monomorphic, diallelic, or triallelic, depending on where the mutations fall on the coalescent tree. We distinguished three cases:

- a) Different lineages: no single lineage (from root to extant individual) contains both mutations, i.e. neither location is a descendant of the other.

- b) Same lineage, different edges: the two mutations fall in a single lineage, but with a node between them, i.e. one is a descendant of the other, but there has been branching between them.
- c) Same lineage, same edge: the two mutations fall on the same edge of the coalescent tree.

We assumed for simplicity that the probability that a given mutation is a transition is independent of the ancestral state, and denoted this probability by  $\alpha$ . Similarly, we assumed the transversion probabilities to be independent of both the ancestral and derived state, and denoted this common probability by  $\beta$ . At any site, a mutation can be a transition or one of two possible transversions, so we had  $\alpha + 2\beta = 1$ .

Case (a) [different lineages]: The site is diallelic if we have parallel mutation, i.e. both mutations have the same derived base. Otherwise, the site is triallelic:

$$P(\text{diallelic}|\text{different lineages}) = \alpha^2 + 2\beta^2$$

$$P(\text{triallelic}|\text{different lineages}) = 1 - (\alpha^2 + 2\beta^2)$$

Case (b) [same lineage, different edges]: The site is diallelic if the second mutation reverts the first mutation, and triallelic otherwise.

$$P(\text{diallelic}|\text{same lineage, different edges}) = \alpha^2 + 2\beta^2$$

$$P(\text{triallelic}|\text{same lineage, different edges}) = 1 - (\alpha^2 + 2\beta^2)$$

Note that the probabilities are the same as in case (a).

Case(c) [same lineage, same edge]: The site is monomorphic if the second mutation reverts the first, and diallelic otherwise. We assumed that this case is rare.

We considered the case when  $\alpha \approx 4\beta$ , which corresponds to a transition:transversion ratio of 2:1, in which we had:

$$\alpha = 2/3$$

$$\beta = 1/6$$

$$\alpha^2 + 2\beta^2 = 1/2$$

An estimate on the proportion of triallelic sites was thus given by:

$$P(\text{triallelic} | M=2) \times P(M=2) / P(M=1 \text{ or } 2) = 1.2\%$$

In summary, these calculations strongly suggested a considerable fraction of the observed triallelic sites are expected to be seen and are not due to genotyping error. Further, all ten singleton triallelic variants subjected to Sanger capillary sequencing were validated (see above). Finally, there was also functional evidence for the triallelic variants to be real: sites at which we observed more than two alleles are on average less conserved among mammals than singleton, diallelic sites (fig. S3).

### Overlap with HGMD and OMIM

We investigated the SNVs that overlapped between the current study and the HGMD and Online Mendelian Inheritance in Man (OMIM) variants to determine which and what fraction of variants reported to impact human health we observed, at what frequencies and how they relate to the predicted functional impact as assessed by SIFT, PolyPhen and phyloP. HGMD variants were queried from Professional version 2010.3. HGMD variants were merged with the current study based on their chromosome and map positions using NCBI human genome build 36.3. OMIM variants cross-referenced to SwissProt, curated by Dr. Andrew C. R. Martin, were downloaded from <http://www.bioinf.org.uk/omim>, last updated on August 20, 2010. OMIM variants were merged with the current study based on the amino acid position and UniProt

identifier. Due to the relatively high rate of misreports in OMIM (63, 64), we carefully reviewed each entry in table S6 and assessed the evidence for a causal effect based on the information in the entry, or if needed, in the primary publication. This led to a categorization of the evidence supporting their involvement in the disorder as low, medium, or high. Top level observations in Europeans are described in the Supplementary Text below.

### Frequency spectra

To generate frequency spectra for  $2n$  chromosomes, we first excluded all sites for which less than  $n$  individuals had been genotyped. For sites with greater than  $2n$  chromosomes observed, we downsampled by calculating the expected number of sites with minor allele count  $i$ , which is given by the hyper geometric distribution (65). The sample size  $n$  was chosen for each population such that 80% of all targeted sites were used, with the exception of the European sample, for which the number was rounded down to an even number of 11,000 (which resulted in 84.6% of targeted sites to be included). We further generated two-dimensional frequency spectra for all population pairs using the same technique.

We summarized the frequency spectra by computing two estimators of  $4N_e\mu$ :  $\theta_\pi$ , which is based on pairwise nucleotide diversity and  $\theta_w$ , Watterson's estimator based on the number of segregating sites (66). We normalize these statistics by gene length by applying the same QC filters to monomorphic sites to determine the total number of fully observed base pair sites. Only autosomal genes were included in calculating the site frequency spectra.

### Variant discovery curves

The fraction of sites expected to be found in a sample of size  $n$  was computed from the frequency spectra using the hyper-geometric distribution if  $n$  was smaller than the sample size (65) of the original spectrum, and using a jackknife approach for upward predictions for  $n$  larger than the observed sample size (7).

### Allele sharing

Following (7) we computed sharing ratios between pairs of populations for each variant site as the probability that two randomly drawn carriers of the pooled sample are from different populations, normalized by the panmictic expectation. Computations were based on the expected two-dimensional frequency spectra with 474 chromosomes per population to have comparable values across population pairs while including all European populations. Reported values are averages across all variant sites in a given minor allele frequency bin, where minor allele frequencies were computed on the pooled, pairwise samples.

### Expected ratio of NS to S variants

To compute the expected ratio of NS to S mutations in a given coding sequence we used the following method. We assumed known rates of mutation from a given nucleotide (e.g. C) to each of the other three nucleotides (e.g. A, G, T), conditioned on whether or not the nucleotide is within a CpG dinucleotide. Let  $S = b_1 b_2 \dots b_L$  be a coding sequence of  $L$  nucleotide bases for a single gene. For two bases  $x$  and  $y$ , we let  $\mu_{xy}$  be the rate of mutation from  $x$  to  $y$  if  $x$  is not in a CpG, and we let  $\mu_{xy}^*$  be the rate of mutation from  $x$  to  $y$  if  $x$  is in a CpG.

For each nucleotide base  $b_i$ , we aimed to calculate the NS mutation rate  $r_i^N$  and S mutation rate  $r_i^S$ . This calculation is best illustrated by an example. Suppose  $b_i$  is the C nucleotide in the codon AAC, which codes for asparagine. We first looked at both the previous and next

nucleotide in the reference sequence to determine whether  $b_i$  is in a CpG (67, 68). We also consider the result of each possible mutation in the standard genetic code – in this case, AAT also codes for asparagine, while AAA and AAG code for lysine, i.e. C→T is S, while C→A and C→G are NS. In this case, we set  $r_i^S = \mu_{CT}$  and  $r_i^N = (\mu_{CA} + \mu_{CG})$ . Note that if  $b_i$  is in a CpG, we used the rates  $\mu_{xy}^*$  instead of  $\mu_{xy}$ .

Then the overall NS:S mutation rate ratio for a single gene was calculated as:

$$\frac{\sum_{i=1}^L r_i^N}{\sum_{i=1}^L r_i^S}$$

To calculate a rate across all genes, we computed the sum over all nucleotides across all genes. For genes which have multiple transcripts, we chose the longest transcript, and suspect the overall results are robust to this choice as we found little variation from transcript to transcript in computed NS:S ratios.

For the mutation rates assumed by the calculation, we used values from two published studies on human-chimp nucleotide differences. Ebersberger et al. (67) (Tables 1-2) report frequencies of each possible nucleotide substitution observed at CpG and non-CpG sites based on 1.9Gb of human-chimp aligned sequence. Nachman and Crowell (68) (Table 4) report estimated transition and transversion mutation rates at CpG and non-CpG sites from pseudogenes. In the latter case, we needed to assume the two possible transversions for a given nucleotide are equally likely (and hence we took the rate for each of the two possible transversions from a given nucleotide to be one half of the overall transversion rate). To assess the robustness of estimated ratio of NS to S mutations to assumed rates, we used both sets of reported values, and we found they gave very similar predicted ratios (2.01 using Ebersberger et al's numbers vs. 2.08 using Nachman and Crowell's numbers).

### Demographic history and mutation rate inference

**Model and data.** We followed the basic approach of Coventry *et al.* (8) to infer the current effective size of Europeans,  $N$ , the recent growth rate in the European population  $r$  and gene specific mutation rates  $\boldsymbol{\mu} = \{\mu_1, \dots, \mu_g\}$ . This approach extends the demographic model of Schaffner *et al.* (69) to include a period of exponential growth in European population size that is parameterized by the current effective size of Europeans,  $N$ , the recent growth rate in the European population  $r$  and gene specific mutation rates  $\boldsymbol{\mu} = \{\mu_1, \dots, \mu_g\}$ . In this model, the European expansion time is determined by solving for the time at which the ancestral European population of size 7,700 (from the Schaffner model) would need to start growing at rate  $r$  to reach a current size of  $N$ .

**Likelihood approximation via Monte Carlo.** The likelihood for a single gene is given by

$$L(N, r, \boldsymbol{\mu}|S) = \sum_{G \in \Psi} P(S|G, \boldsymbol{\mu}) \cdot P(G|N, r),$$

where  $S$  is the site frequency spectrum for the gene,  $\Psi$  is the set of all possible genealogies  $G$ . Since  $\Psi$  is prohibitively large, the likelihood is approximated via Monte-Carlo. To be specific, we first generated  $M$  random genealogies  $G_i, i = \{1, \dots, 400\}$  for each combination of demographic parameters  $N$  and  $r$  using fastsimcoal (70), a coalescent simulator that allows for multiple coalescent events per generatio. We approximate  $L(N, r, \boldsymbol{\mu}|S)$  as the average of  $P(S|G_i, \boldsymbol{\mu})$  across these samples:

$$L(N, r, \boldsymbol{\mu}|S) \approx \frac{1}{M} \sum_{i=1}^M P(S|G_i, \boldsymbol{\mu}).$$

Assuming that mutations follow a Poisson process on the genealogy,  $P(S|G_i, \boldsymbol{\mu})$  can be calculated as the product of a “shape likelihood” and “rate likelihood” (44).

$$P(S|G_i, \boldsymbol{\mu}) = P(S|G_i, S_{tot})P(S_{tot}|G_i, \boldsymbol{\mu}).$$

The shape likelihood,  $P(S|G_i, S_{tot})$  is specified by a multinomial with  $S_{tot} = \sum_{i=1}^m S_m$  total observations, observed counts  $S$ , and success probabilities for a count of sites with  $x$  minor allele counts given by the relative length of all branches of the genealogy  $G_i$  with  $x$  descendants. The rate likelihood,  $P(S_{tot}|G_i, \boldsymbol{\mu})$ , is specified by a Poisson distribution for  $S_{tot}$  with a rate that depends on the total length of the genealogy and the mutation rate times the total number of sites considered:

$$P(S_{tot}|G_i, \boldsymbol{\mu}) = e^{-nL\mu} \cdot \frac{(nL\mu)^S}{S!},$$

where  $L$  is the total length of the genealogy  $G_i$  and  $n$  the number of sites considered.

The above likelihood calculation can be done for each gene  $g$ , giving a likelihood  $L_g(N, r, \mu_g)$ . To extend to multiple genes, we let  $\bar{\mu} = (\mu_1, \dots, \mu_Z)$  where  $Z$  is the number of genes, and the likelihood for all genes was calculated by taking the product over all genes:

$$L(N, r, \bar{\mu}) = \prod_{z=1}^Z L_g(N, r, \mu_z)$$

For the model with a single  $\mu$  value for all genes, we let  $\mu_g = \mu$  for all  $g$ .

We restricted our inference to frequency spectra generated for genes on autosomes only and we only included four-fold degenerate synonymous sites. This allowed us to include a total of 188 genes in this analysis. Following Coventry *et al.* (8) we also pooled variants with minor allele counts  $> 17$  into a single type. The frequency spectra are available in database table S3.

#### **Initial grid approximation to the likelihood surface and comparison to Coventry *et al.***

We initially used the same grid, marginal likelihood and posterior mean calculations as in Coventry *et al.* However, when we investigated the effect of changing the parameter grid, we found that the posterior mean estimates were dependent on the choice of parameter grid points. In effect, the Coventry method assigns a uniform prior over the parameter grid points, which will give different posterior distributions when, for example, the grid range is extended, or when the grid points for a parameter are placed on a logarithmic scale. For this reason, we chose to follow a strict maximum likelihood approach (retaining the Monte Carlo approximation to the likelihood of Coventry *et al.*), which gives estimates of  $N$ ,  $r$ , and per-gene mutation rates that are more robust to the choice of grid points.

**Expanded grid and strict maximum likelihood inference.** Our initial per-gene mutation rate mutation rate estimates were very close to  $1e-8$ , which is at the edge of our initial grid, so we expanded the grid over mutation rate values from  $1e-9$  to  $1e-7$  on a logarithmic scale (101 steps). Similarly, we extended the range of possible values of  $N$  to extend from 10,000 to 100 million on a logarithmic scale (41 steps). We chose our grid for  $r$  such that  $r - 1$  extended from .005 to .14 on a logarithmic scale (57 steps), and we also included  $r = 1.0$  (no growth). This grid spans the domains of parameter space with non-trivial likelihood and yet allows relatively fine-scale calculation of the surface in the regions of highest likelihood. To speed up the calculations, we recycled the coalescent trees for all grid points sharing the same  $N_e$  and  $r$  values.



The maximum likelihood estimate for  $N$  was 4.0 million with a 2 log-likelihood profile likelihood confidence interval of  $(2.5 \times 10^6, 5.0 \times 10^6)$  and for  $r$  was 1.017 (CI = 1.012, 1.023). The profile likelihood surface and per-gene mutation rate estimates are shown in Fig. 1C and 1D of the main text. Profile likelihood surfaces of  $N_e$  and a single global  $\mu$  (or of  $r$  and  $\mu$ , fig. S15) confirm that  $\mu$  is an identifiable parameter in this inference scheme (i.e. the likelihood surface has a single point maximum as opposed to the ridge along fixed values of  $N_e\mu$  expected in traditional population genetic inference).

**Robustness to false negatives.** We next checked the robustness of our inference to variants that were undetected due to variable coverage. Our quality control indicated a false negative rate of ~2%-8% for singletons plausible, so we spiked in extra singletons to mimic missing 2% and 8% of the total number of singletons.

Our maximum likelihood estimate of  $r$  was 1.018 in both cases and thus slightly higher than the estimate from the raw data. The maximum likelihood estimate for  $N$  were very similar with  $4.0 \times 10^6$  and  $5.0 \times 10^6$  for 2% and 8% singletons added, respectively. The resulting median per gene mutation rates were  $1.45 \times 10^{-8}$  in both cases and thus only marginally larger than our initial estimate of  $1.38 \times 10^{-8}$ .

**Robustness to conservation of functional synonymous sites.** One concern with our analysis is that some synonymous sites may be functionally constrained or experiencing background selection, which may lead to an artificial variance in inferred mutation rates across genes. We note that the average phyloP for the four-fold degenerate sites considered in this analysis is close to zero (0.08) and only 10% of all four-fold degenerate sites have phyloP scores above the median phyloP score observed at non-synonymous sites. More importantly, when we correlate the MLEs for  $\mu$  for each gene with the average phyloP score at all coding sites in a gene we find no correlation ( $p=0.08$ ).

#### Ratio-based estimates of deleteriousness conditional on frequency

Given the ratio of nonsynonymous to synonymous variants  $r_i$  within minor allele frequency  $i$  and the same ratio  $r_f$  observed among variants of frequency  $f$ , an estimator of the fraction of nonsynonymous variants with frequency  $i$  that are deleterious enough to never reach frequency  $f$  is given by  $1-(r_f/r_i)$  (2). While we note this inference procedure does not account for changing population size and/or the effects of background selection on synonymous variants, we used this approach to estimate the fraction of nonsynonymous mutations deleterious enough to never get fixed in humans ( $r_f = 0.266$  from (2)) and the fraction to never reach high frequencies ( $r_f = 0.516$  estimated from all variants  $> 5\%$  in our European sample). The same rationale can be used to infer the fraction of new mutations never to be found polymorphic in a sample of 11,000 individuals by contrasting the expected ratio of nonsynonymous to synonymous variants of random mutations ( $r_i=2.01$ , see above) and the same ratio observed among singletons ( $r_f = 1.743$ ). We thus estimate that about 13% of newly arising NS SNVs are deleterious enough not to be discovered in a sample of 11,000 individuals.

This last calculation provides an upper bound for the fraction of novel nonsynonymous mutations that are dominant lethal. We can thus estimate an upper bound on the number of de novo dominant lethal mutations arising per generation in a single individual. Given the total length of the human exome of 35.2 Mb (71), using our inferred median mutation rate of  $1.38 \times 10^{-8}$  as a proxy for the whole coding genome and assuming that 2/3 of all de novo mutations in coding regions are non-synonymous we arrive at  $\sim 0.32$  de novo non-synonymous mutations per generation per individual. Hence, we estimate that no more than  $0.32 \times 0.13 =$

0.042 dominant lethal mutations arise de novo per generation per individual, which corresponds to less than one per 23 generations.

### Association analysis

Each of the sequenced collections includes a wide range of clinical and laboratory measures that merit careful analysis and interpretation, which are under way. However, to illustrate an analysis strategy and investigate possible associations of common coding and rare variants with the diseases represented in this collection, we present a standardized and simplified analysis for each of the 12 diseases.

As shown in table S4, very few disease-matched controls were included in this study. A population control strategy was employed to test for association with disease status. Control subjects were available from two population samples (CoLaus and LOLIPOP) and from other case groups where consent and/or the approval of an ethics review board was granted. There were a total of 10,114 subjects of European origin identified as possible controls. In this analysis, the only criteria used to select controls was genetic similarity assessed by principal component analysis (PCA) in the entire European sample using available genome-wide genotype data on a common set of SNPs present on the variety of genotyping platforms, including Affymetrix 5.0 and 6.0 and Illumina 550K. The genetic similarity between each case-control pair was based on the weighted Euclidean distance between each case and control (72) using the first five principal components. For each case collection, a range of case to matching control ratios was explored, selecting the maximum number of controls that resulted in a median distance less than 0.02. The resulting numbers of cases and controls and median Euclidean distance between them is listed in table S7 for each study.

Association analysis with case status was carried out using logistic regression, including the first five principal components as covariates in the model and assuming an additive genetic model. Given the use of population controls, no study-specific covariates were included. The one exception is the GEMS dyslipidemia study where normolipidemic study controls were available; age, sex, body mass index, physical activity and alcohol use were included as covariates. In the analyses presented here, only coding variants were included. Single variant analyses were carried out for all SNPs with a European allele frequency greater than 0.5% (606 “common” SNPs in this analysis). Coding variants, including those in splice sites, were analyzed as an aggregate indicator of rare variant carriage status, taking on a value of zero for no rare variants and one where one or more rare variants were present in a subject. Two aggregate tests were carried out and reported here: 1) all rare variants that lead to a change in the amino acid sequence (NS, nonsense and splice site variants) and 2) all amino acid-changing variants that are predicted to be functional by SIFT or PolyPhen or occur at a highly conserved base position ( $\text{phyloP} \geq 2$ ).

### Power analysis

Statistical power to test the null hypothesis of no difference in cumulative rare variant frequencies in cases versus controls was carried out asymptotically by computing the noncentrality parameter of a chi-square distribution with one degree of freedom. The noncentrality parameter was derived using the expected genotype frequencies in cases and controls given the cumulative minor allele frequency observed for each gene, the number of cases and population controls, and assuming Hardy-Weinberg equilibrium and a disease

prevalence of 5% (see (73) for details). Power was computed at a test-wise significance level of 0.05/202.

## Supplementary Text

### Gene-to-gene variation of common and rare variants and mutation rates

Although the number of common ( $MAF > 0.5\%$ ) and rare ( $MAF \leq 0.5\%$ ) NS variants (fig. S13) and the cumulative NS rare variant frequencies (fig. S4) are correlated with the number of successfully sequenced coding bases, we observed a substantial amount of gene-to-gene heterogeneity. Ordinary least squares regression with sequenced coding length as a predictor explained only 15% of the intergenic variation in the number of common NS variants, but 71% of the rare variants, and 53% of the cumulative MAF (cMAF) of rare variants predicted to affect protein function by SIFT or PolyPhen or occur at a highly conserved base ( $phyloP \geq 2$ ) (table S15). Mutation rate was not associated with coding length.

We investigated several possible explanations for the variation remaining after adjusting for sequenced coding length, including average coding sequence conservation scores, GC content, recombination rate, as well as Gene Ontology and Interpro terms, and embryonic lethality of mouse knock outs of the homologous gene. We estimated the average phyloP and GC content for all successfully sequenced coding bases for each gene and average sex-adjusted recombination rate within genes. Adjusting for coding length by division (except for mutation rate), we tested the association of these variables with a likelihood ratio test and estimated the amount of variation it explained (table S15). Average phyloP score was strongly associated with all dependent variables except mutation rate. GC content was strongly associated with the number of rare NS variants and mutation rate. Recombination rate was not significantly associated in any of the tests conducted and was dropped from the final models. The overall amount of variation explained, after adjusting for coding length, was 12%, 20%, 3%, and 5% for the number of common NS variants, number of rare NS variants, cMAF, and mutation rate, respectively.

We investigated whether the differences in the coding length-adjusted measures of genetic variation were explained by differences in gene activity or function using Gene Ontology and Interpro terms. Each gene may have several GO terms in each of three categories. We selected for analysis any term that was observed in at least 5% of the selected genes. For each term, we evaluated its association with each of the three length-adjusted measures of genetic variation by comparing those genes with the selected term to all others with a Wilcoxon sign rank test. As there are many terms, we only considered those with p-values less than 0.05 divided by the number of terms within the GO class to be statistically significant (Bonferroni adjustment). We found no statistically significant associations to report. We conducted a similar analysis using the Interpro (74) version 30.0 accessed from Ensembl BioMart on February 2, 2011. Again, no statistically significant associations were identified.

Finally, we investigated whether knocking out the gene resulted in embryonic lethality in a mouse knockout model provided any additional explanation for the intergenic variability in NS variation. Mouse knockout phenotypes were downloaded from the Jackson Labs MGI Biomart (75) on March 1, 2011. We identified genes with any type of lethal phenotype. Only 17 (8%) of our genes had documented lethal mouse knockout phenotypes (*ADAM10*, *ADIPOQ*, *BRD4*, *EDNRA*, *EDNRB*, *FGF10*, *GSK3B*, *HHIP*, *HTR4*, *IKBKKB*, *MAPK14*, *PIK3CA*, *PPARD*, *PSEN1*, *PSEN2*, *STIM1*, and *TNFRSF1A*) compared to 27% of all genes with documented phenotypes. We found the lethality phenotype was associated with the number of rare NS variants after

adjusting for coding length ( $p = 0.0017$ ), but not with the number of common variants or cumulative MAFs. However, lethality was also significantly associated with average phyloP. After adjusting for average phyloP, lethality was no longer significantly associated.

Hence, amongst the possible explanations for the intergenic variability investigated in this study, only average sequence conservation was consistently associated. However, although statistically significant, average phyloP did not explain a sufficient amount of variation to prove particularly useful in predicting the amount of rare NS variation expected.

#### Overlap with OMIM and HGMD

Fifty three of the 202 genes in this study are reported to have disease-causing mutations in HGMD. A total of 170 of 1,460 (11.6%) disease causing (DM) variants in 35 genes were observed in the combined sample. Of those, 149 were observed in Europeans, 40 in South Asians and 51 in African Americans. In Europeans, all disease-causing mutations had MAF less than 5%, and 23.5% had MAF greater than 0.1%, with nearly half (48.3%) being observed in only one or two subjects.

A total of 46 OMIM variants in 25 genes were observed in the combined sample. Of those, 44 were observed in Europeans, 20 in South Asians and 26 in African Americans. In total, 17.0% of disease-causing variants in these genes were observed in our sample but were not clustered within any particular disease cohort with the exception that the Alzheimer's disease variants were enriched in the Alzheimer's cases (1.0% in cases versus 0.28% in others; Fisher's  $p = 0.005$ , odds ratio = 3.8). There were 35 variants in 17 genes after excluding relatively common SNVs (table S6). The combined European frequency of those variants with medium to high evidence that they cause the corresponding indicated disorder in a dominant fashion was 2.7%. However, most are exceedingly rare. After excluding two variants with MAF >0.5% yields a combined frequency of 0.35%. However, caution is needed interpreting this result as little is known about the penetrance of most of these variants, having been reported in a single study or pedigree. Many of these variants may have relatively low penetrance in the general population.

#### Comparison of SIFT, PolyPhen and phyloP

Of 10,995 total NS SNVs called in the entire sample, 97.7% and 98.7% resulted in PolyPhen and SIFT predictions, respectively (table S16). Of those variants called by both PolyPhen and SIFT, 43.3% were called as benign/tolerated by both and 12.7% as probably damaging/damaging by both (i.e. 77.7% concordant excluding possibly damaging and low confidence damaging groups; table S17). A similar percentage were called damaging by SIFT but benign by PolyPhen (14.0%); however, only 2.2% were called probably damaging by PolyPhen but tolerated by SIFT.

The relationship between sequence conservation assessed by phyloP score and predicted functionality by SIFT and PolyPhen were very similar (fig. S14), though they differed significantly between methods. SIFT tolerated NS SNVs had significantly lower phyloP scores compared to PolyPhen benign ( $p = 3.4 \times 10^{-8}$ ). The same was true of the low confidence damaging compared to the possibly damaging classes. The distribution of phyloP scores between SIFT damaging and PolyPhen probably damaging NS SNVs were not statistically significantly different ( $p = 0.13$ ). The difference between the median phyloP scores between tolerated/benign and damaging/probably damaging NS SNVs was 1.1 and 0.92 for SIFT and PolyPhen, respectively. This difference was similar to that observed between common and

singleton NS SNVs (Fig. 2E). A total of 5957 NS variants (63%) were predicted to be damaging by PolyPhen or SIFT, or occurred at a nucleotide position with a phyloP conservation score greater than 2.0.

Rare NS SNVs were more often predicted to be damaging by SIFT ( $p < 10^{-4}$ ) (60) and PolyPhen ( $p < 10^{-3}$ ) (59) than common, NS SNVs (Fig. 2D). Similar, patterns of evolutionary conservation as measured by phyloP score (62) were negatively correlated with the frequency of NS variants ( $p < 10^{-12}$ ), but not S variants ( $p = 0.62$ ). Such negative correlation is expected if long-term conservation and on-going purifying selection act on the same sites. We also saw a negative correlation for UTR variants ( $p < 10^{-9}$ ) and a weaker, but still significant relationship for intronic variants ( $p < 0.005$ ).

The 297 SNVs from the current study found in the Human Gene Mutation Database (HGMD) include five classifications: disease-associated and putatively functional polymorphisms (DP, N = 45), disease-associated polymorphisms with additional support (DFP, N = 40), in vitro or in vivo functional polymorphisms (FP, N = 41), frameshift or truncating variant (FTV, N = 1) and disease-causing mutations (DM, N = 170). We explored the relationship between HGMD class and SIFT and PolyPhen predictions and phyloP sequence conservation. We found no relationship between HGMD class and functional predictions (Fisher  $p > 0.05$ ). However, we did observe that phyloP scores differed significantly among classes. DP and DFP classes had median scores of 0.36 and 0.48, respectively, with their third quartiles falling below the medians of the other three classes. FP and DM were distributed similarly with medians of 1.2 and 1.4 (Wilcoxon  $p = 0.90$ ). The single FTV SNV had a phyloP score of 2.9, nearly the maximum achievable in the placental alignment.

We observed similar patterns in the analysis of the 46 HGMD SNVs observed in this study that were also reported in OMIM compared to those that were not. SIFT and PolyPhen predictions were not associated with OMIM inclusion (Fisher  $p > 0.05$ ), but phyloP score was significantly associated with medians of 2.1 and 1.0 (Wilcoxon  $p = 0.025$ ) for those SNVs that were and were not in OMIM, respectively.

### Association analysis results

An alternative strategy to uncover the contribution of a gene to traits of interest is the analysis of rare variants in aggregate (5). Two metrics of rare variant burden are the number of rare variants and the cumulative minor allele frequency (cMAF) of rare and potentially deleterious SNVs within each gene. As we saw for the number of variants, the values of rare cMAF across our whole sample irrespective of disease were strongly correlated with the number of sequenced bases per gene ( $r^2 = 0.54$ ). The cMAF ranged from 0 to 3.9% (Figs. 1F, S4). Among genes with the lowest cMAF, singletons and doubletons accounted for 71% of the cMAF (Fig. 1E); among genes with the highest rare variant cMAF singletons and doubletons accounted for 25% of the cMAF.

The high level summary of the association results are presented as quantile-quantile plots for each disease in fig. S6. These plots and corresponding genomic control  $\lambda$ s illustrate that even with principal components in the model, some type I error inflation remains in several of the common and rare variant results. The common and rare variant  $\lambda$ s were significantly correlated ( $>0.45$ ) and the average  $\lambda$  was very similar amongst the three tests presented (1.21, 1.31 and 1.22 for common, rare amino acid changing and rare functional, respectively), suggesting that the effect of population structure was less well controlled for rare as opposed to common variant

tests with this study design. The drop in average  $\lambda$  for the rare functional test is likely due to decreased power tied to lower cumulative minor allele frequencies (cMAFs).

Considering the number of tests conducted for each disease (1010), and excluding osteoarthritis due to the severe type I error inflation, there were five associations that were statistically significant ( $\alpha_{\text{Test}} = 0.05/1010 = 5 \times 10^{-5}$ ; not accounting for testing multiple diseases), all amongst common variants. Common variants in *BRD2* located with the major histocompatibility complex (MHC) of chromosome 6 were significantly associated with multiple sclerosis and rheumatoid arthritis, both known to have relatively large MHC risk factors. Subsequent analysis with HLA alleles demonstrated that the *BRD2* associations were the result of linkage disequilibrium within the locus. The same was true of an association observed between *NFKB1L1* and multiple sclerosis. Three common variants within *CHRNA3* and *CHRNA5*, occurring at the same locus on chromosome 15 previously associated with nicotine dependence and smoking behavior, were significantly associated with COPD. Previous studies of COPD suggest that this association reflects the lack of control for smoking behavior in the choice of population controls. A common S variant within *KCNMA1* was also significantly associated with COPD status (rs45527834, MAF = 0.9%,  $p = 1.9 \times 10^{-6}$ , OR = 2.9). The depth and quality of this variant were high with very few missing genotypes. Given the low frequency of this variant, and its absence from HapMap sample genotypes, it is not likely to be well tagged by current genotyping platforms and could have escaped detection from previous GWAS. However, no other variants in this gene, common or rare, showed any evidence of association with COPD status. None of the rare variant tests satisfied the disease-specific statistical significance threshold.

We next investigated any insight that may be gained from having sequenced genes that had been previously shown to have common variant associations with the diseases studied here. We identified the set of candidate genes by filtering the NHGRI GWAS Catalog(22) (accessed on August 3, 2011) for associations with genes and diseases that overlap with the current study, shown in table S8. There was an overlap of 13 genes in six diseases. Using these gene-trait pairs as a set of a priori candidate genes, we reevaluated the rare variant association tests adjusting for the number of genes selected within each of the six diseases. There were four resulting associations that were found to be statistically significant ( $p < 0.05$  after adjusting for the number of tests for the given disease): the test of amino acid-changing variants in *IL6* and *TNFRSF1A* with multiple sclerosis and *ITGB1* with unipolar depression and the test of functionally damaging variants in *IL6* and multiple sclerosis (table S9).

Of these, the association of variants predicted to be functionally damaging in *IL6* with multiple sclerosis is the most statistically compelling. The cumulative frequency of amino acid-changing variants in *IL6*, a 212 amino acid protein, was 0.15% overall and 0.06% for those predicted to affect protein function. Cases were five times more likely to carry a NS variant than controls and 12 times more likely to carry one predicted to be functionally damaging. Only one variant, carried by a case, was predicted to be functionally damaging by SIFT and PolyPhen. These results suggest that in addition to the modest effect of at least one common variant located near *IL6* (MAF = 0.05, OR = 0.57) (76), carriage of rare variants that affect the amino acid structure increase susceptibility to multiple sclerosis. Given the nature of these very rare variants carried by cases, future replication of this association will be reliant on sequencing the coding regions of additional cases and controls. To have 80% power to replicate the observed association, approximately 700 cases and controls would need to be sequenced.

The absence of compelling rare variant associations led us to estimate the magnitudes of genetic effects that would be required with available sample sizes to have high statistical power to identify significant gene-disease associations. Given the range of cMAFs of rare variants predicted to affect gene function observed (Fig. 1F), in an association study of 1,000 cases and 4,000 population controls (a size approached by half the studies here), only 8% of genes would have enough rare alleles to result in at least 80% power to detect an average odds ratio of 2.5 across selected variants, and only 56% of genes could detect odds ratios of 5 (fig. S5). Sample sizes of more than 10,000 cases and controls would be needed to have adequate power to detect odds ratios on the order 2.5 in at least half of the genes. Currently, little is known about the range of effect sizes that rare variants might have on common disease or to what extent rare variants functional may be enriched in extreme cases or tails of a quantitative distribution. However, the results here suggest the sample sizes required to study them will have to be very large, particularly for genes with small coding regions critical to gene function.

#### Further acknowledgements

We would like to thank the collaborating clinicians and their research teams, academic consultants and others who have contributed to the recruitment and characterization of subjects in the disease areas included in this study listed below.

We thank the co-primary investigators of the CoLaus study, Gerard Waeber and Peter Vollenweider, and the PI of the PsyCoLaus Study Martin Preisig. We gratefully acknowledge Yolande Barreau, Anne-Lise Bastian, Binasa Ramic, Martine Moranville, Martine Baumer, Marcy Sagette, Jeanne Ecoffey and Sylvie Mermoud for their role in the CoLaus data collection. The CoLaus study was supported by research grants from GlaxoSmithKline and from the Faculty of Biology and Medicine of Lausanne, Switzerland. The PsyCoLaus study was supported by grants from the Swiss National Science Foundation (#3200B0-105993) and from GlaxoSmithKline (Drug Discovery - Verona, R&D).

We thank the co-primary investigators of the LOLIPOP study: Jaspal Kooner, John Chambers and Paul Elliott. The LOLIPOP study is supported by the National Institute for Health Research Comprehensive Biomedical Research Centre Imperial College Healthcare NHS Trust, the British Heart Foundation (SP/04/002), the Medical Research Council (G0700931), the Wellcome Trust (084723/Z/08/Z) and the National Institute for Health Research (RP-PG-0407-10371).

We thank Metabolic Syndrome GEMs investigators: Scott Grundy, Jonathan Cohen, Ruth McPherson, Antero Kesaniemi, Robert Mahley, Tom Bersot, Philip Barter and Gerard Waeber. We gratefully acknowledge the contributions of the study personnel at each of the collaborating sites: John Farrell, Nicholas Nikolopoulos and Maureen Sutton (Boston); Judy Walshe, Monica Prentice, Anne Whitehouse, Julie Butters, and Tori Nicholls (Australia); Heather Doelle, Lynn Lewis, and Anna Toma (Canada); Kari Kervinen, Seppo Poykko, Liisa Mannermaa, and Sari Paavola (Finland); Claire Hurrell, Diane Morin, Alice Mermoud, Myriam Genoud, and Roger Darioli (Switzerland); Guy Pepin, Sibel Tanir, Erhan Palaoglu, Kerem Ozer, Linda Mahley, and Aysen Agacdiken (Turkey); and Deborah A. Widmer, Rhonda Harris, and Selena Dixon (United States). Funding for the GEMs study was provided by GlaxoSmithKline.

We thank the primary investigator, Stephen E. Epstein, and all the staff who were involved in recruitment of patients for MedStar cohort: Mary Susan Burnett, Joseph M. Devaney, Kenneth M. Kent, Joseph M. Lindsay, Augusto D. Pichard, Lowell Satler, Ron Waksman. Recruitment of the MedStar cohort was supported by a research grant from GlaxoSmithKline.

We thank the co-primary investigators of the Genetics of Generalized Osteoarthritis ('GOGO') Study: V.B Kraus (Duke University Medical Center, Durham, NC); J.M Jordan, JB Renner (Thurston Arthritis Research Center, University of North Carolina, Chapel Hill, NC); M. Doherty (University of Nottingham, Nottingham, UK); A.G. Wilson (University of Sheffield, Sheffield, UK); R. Moskowitz, M. Hooper (Case Western Reserve University, Cleveland, OH); M Hochberg (University of Maryland, Baltimore, MD); R Loeser (Wake Forest University of Medicine, Winston-Salem, NC), and U. Atif (Genetics GlaxoSmithKline).

We thank Theadore Ptak, Sandra French (Toronto Digestive Disease Associates, Toronto, ON, Canada), Mark Silverberg, Lori Badadajay (Mount Sinai Hospital, Toronto, ON, Canada), and Yehuda Ringel, Sarah Causey, Sarah Yeskel (University of North Carolina at Chapel Hill, Chapel Hill, NC) for their work on the Irritable Bowel Syndrome Study.

We thank the primary investigator, A.G. Wilson (University of Sheffield, Sheffield, UK), for his work on the Genetics of Rheumatoid Arthritis (GORA) Study.

We thank the following people from the GeneMSA study: Jorge R. Oksenberg, Stephen L. Hauser, Joanne Wang, Sergio E. Baranzini, Daniel Pelletier, Pamela Qualley, Robin R. Lincoln, Refujia Gomez, Michaela F. George, Hourieh Mousavi, Rosa Guerrero, Wendy Chin, Ari Green, Emmanuelle Waubant, Darin T. Okuda, Bruce A. C. Cree (University of California at San Francisco, California, USA); Ludwig Kappos, Yvonne Naegelin, Ernst-Wilhelm Radue, Raija L.P. Lindberg, Jens Kuhle, Achim Gass (University Hospital Basel, Basel, Switzerland); and Chris H. Polman, Frederik Barkhof, Bernard Uitdehaag, Jeroen Geurts, Madeleine Sombekke, Jolijn Kragt, Hugo Vrenken (Vrije Universiteit Medical Centre, Amsterdam, The Netherlands).

We thank Jorge Oksenberg (UCSF) for DNA samples from African Americans. Sample collection was funded by grants from the National Institute of Health (R01 NS046297) and the National Multiple Sclerosis Society (RG3060C8).

We thank Reetta Kalviainen, Anne-Mari Kantanen (Kuopio Epilepsy Center, Kuopio University Hospital, Kuopio, Finland) and Kai Eriksson (Pediatric Neurology Unit, Tampere University Hospital, Tampere, Finland) for their work on the Epilepsy HitDIP study.

We thank Gunter Kraemer, Thomas Dorn, Jorg Hansen (Swiss Epilepsy Center, Zurich, Switzerland); Bernard Steinhoff (Kork Epilepsy Center, Kehl-Kork, Germany); and Heinz-Gregor Wieser, Dominik Zumsteg, Marcos Ortega (Department of Neurology, University Hospital Zurich, Zurich, Switzerland) for their work on Epilepsy GenEpa Study.

We thank Michael Borrie (Parkwood Hospital, Lawson Research Institute, London, ON, Canada); Andrew Kertesz (St. Joseph's Healthcare Centre, London, ON, Canada); Richard Delisle (Clinique de Neurologie et des Neurochirurgie de Trois-Rivieres, Trois-Rivieres, QC, Canada); Luis Fornazzari (St. Michael's Hospital, Department of Psychiatry, Behavioral Neurology, University of Toronto, Toronto, ON, Canada); D. Antonio Guzman, Inge Loy-English (SCO Health Service, Ottawa, ON, Canada); Peter St. George-Hyslop, Ron Keren, John Wherrett (University Health Network, University of Toronto, Toronto, ON, Canada); Howard Feldman, Robin Hsiung (University of British Columbia/Vancouver Hospital and Health Sciences Centre, Vancouver, BC, Canada); and Serge Gauthier (McGill Center for Studies in Aging, Montreal, QC, Canada) for their work on the Alzheimer's Disease GenADA Study.

We thank S. Lucae, B. Müller-Myhsok, and F Holsboer (Max Planck Institute of Psychiatry, Munich, Germany) for their work on the Unipolar Depression Study.

We thank D. St Clair (Department of Mental Health, University of Aberdeen, Aberdeen, United Kingdom); D. Rujescu, I. Giegling (Division of Molecular and Clinical Neurobiology, Department of Psychiatry, Ludwig-Maximilians-University, Munich, Germany); and M.



Maziade (Centre de Recherché, Université Laval Robert-Giffard, Québec, Canada) for their work on the Schizophrenia Study.

We thank R. Day, K. Matthews (Centre for Neuroscience, Division of Medical Sciences, University of Dundee, Dundee, United Kingdom); J Strauss, J.L. Kennedy, J.B. Vincent (Centre for Addiction and Mental Health, Toronto, Neurogenetics Section, Toronto, ON, Canada); P. McGuffin and A. Farmer (MRC Social, Genetic and Developmental Psychiatry Centre, Institute of Psychiatry, King's College London, Denmark Hill, London, United Kingdom) for their work on the Bipolar Disorder Study.

We thank the ECLIPSE steering and scientific committees and investigators. The ECLIPSE Steering Committee: Per Bakke (Norway), Courtney Crim (GlaxoSmithKline USA) Harvey Coxson (Canada), Lisa Edwards (GlaxoSmithKline, USA), David Lomas (UK), William MacNee (UK), Edwin Silverman (USA), Ruth Tal-Singer (Co-chair, GlaxoSmithKline, USA), Jørgen Vestbo (Co-chair, Denmark), Julie Yates (GlaxoSmithKline, USA).

The ECLIPSE Scientific Committee: Alvar Agusti (Spain), Peter Calverley (UK), Bartolome Celli (USA), Courtney Crim (GlaxoSmithKline, USA), Bruce Miller (GlaxoSmithKline, UK), William MacNee (Chair, UK), Stephen Rennard (USA), Ruth Tal-Singer (GlaxoSmithKline, USA), Emiel Wouters (The Netherlands), Julie Yates (GlaxoSmithKline, USA).

The ECLIPSE Investigators: Bulgaria: Yavor Ivanov, Pleven; Kosta Kostov, Sofia. Canada: Jean Bourbeau, Montreal, Que Mark Fitzgerald, Vancouver, BC; Paul Hernandez, Halifax, NS; Kieran Killian, Hamilton, On; Robert Levy, Vancouver, BC; Francois Maltais, Montreal, Que; Denis O'Donnell, Kingston, On. Czech Republic: Jan Krepelka, Praha. Denmark: Jørgen Vestbo, Hvidovre. Netherlands: Emiel Wouters, Horn-Maastricht. New Zealand: Dean Quinn, Wellington. Norway: Per Bakke, Bergen. Slovenia: Mitja Kosnik, Golnik. Spain: Alvar Agusti, Jaume Sauleda, Palma de Mallorca. Ukraine: Yuri Feschenko, Kiev; Vladimir Gavrisyuk, Kiev; Lyudmila Yashina, Kiev; Nadezhda Monogarova, Donetsk. United Kingdom: Peter Calverley, Liverpool; David Lomas, Cambridge; William MacNee, Edinburgh; Dave Singh, Manchester; Jadwiga Wedzicha, London. United States of America: Antonio Anzueto, San Antonio, TX; Sidney Braman, Providence, RI; Richard Casaburi, Torrance CA; Bart Celli, Boston, MA; Glenn Giessel, Richmond, VA; Mark Gotfried, Phoenix, AZ; Gary Greenwald, Rancho Mirage, CA; Nicola Hanania, Houston, TX; Don Mahler, Lebanon, NH; Barry Make, Denver, CO; Stephen Rennard, Omaha, NE; Carolyn Rochester, New Haven, CT; Paul Scanlon, Rochester, MN; Dan Schuller, Omaha, NE; Frank Scirba, Pittsburgh, PA; Amir Sharafkhaneh, Houston, TX; Thomas Siler, St. Charles, MO; Edwin Silverman, Boston, MA; Adam Wanner, Miami, FL; Robert Wise, Baltimore, MD; Richard Zu Wallack, Hartford, CT. The ECLIPSE Study was funded by GlaxoSmithKline (Clinicaltrials.gov identifier NCT00292552; GSK study code SCO104960).

We would like to thank the GenKOLS Investigators: Amund Gulsvik and Per Bakke, Bergen Norway. The GenKOLS study was funded by GlaxoSmithKline.

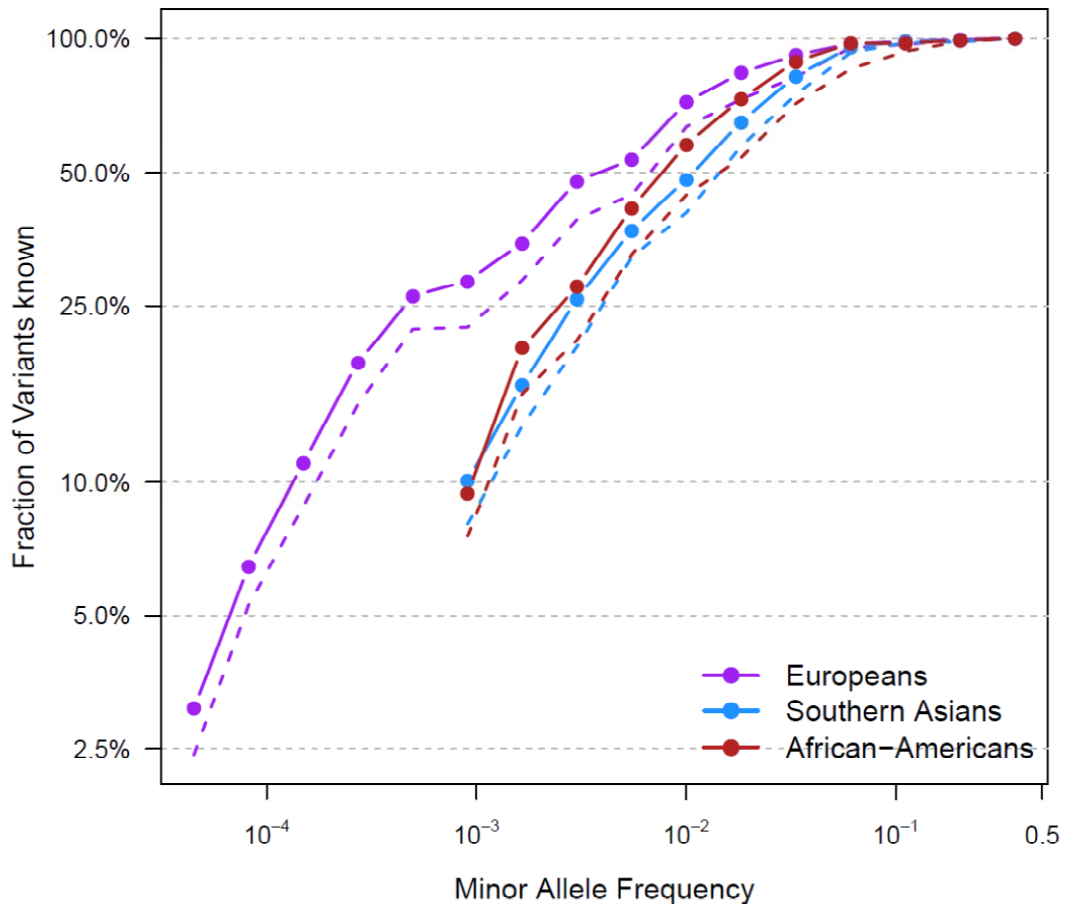

**Fig. S1.**

**The fraction of variants previously reported.** The fraction of the variants found in this study already reported in dbSNP 132 (solid line) and after excluding all variants only reported by the 1000 Genomes Project (dashed lines; reflecting the contribution of that study to the catalog of known variants) for Europeans, African Americans and Southern Asians.

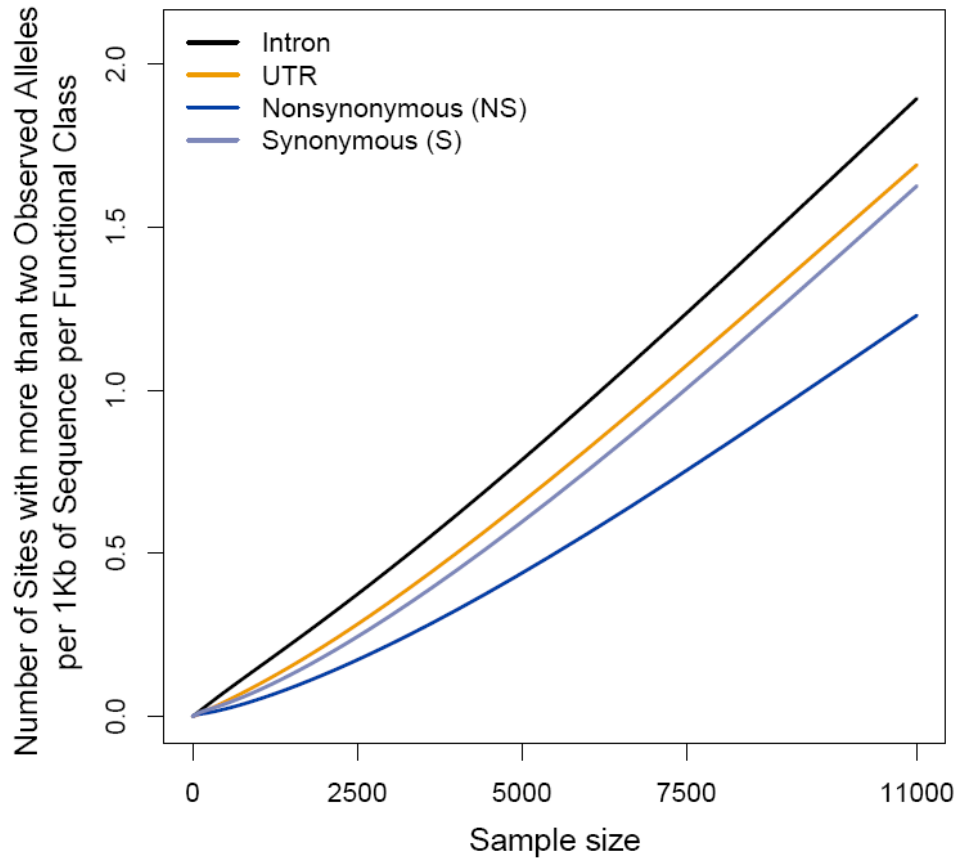

**Fig. S2.**

**Rate of triallelic variant discovery in Europeans.** Number of triallelic variants discovered per kilobase sequenced with increasing sample size, stratified by variants found within introns, UTR and coding exons. NS and S coding lengths are adjusted by the number of base mutations that could give rise to their respective changes.

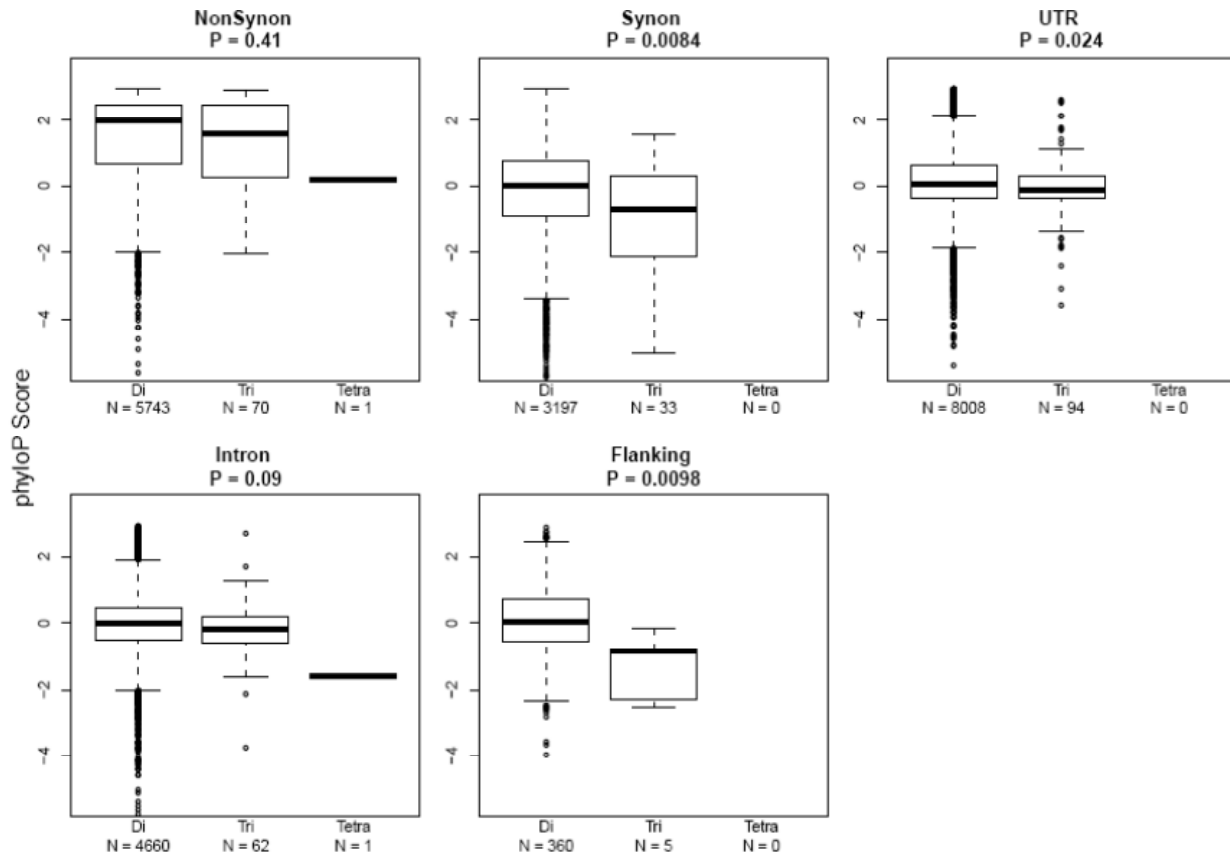

**Fig. S3.**

**Distribution of vertebrate sequence conservation at singleton diallelic, triallelic and tetraallelic positions in Europeans.** P-values are the result of the nonparametric Wilcoxon test of homogeneity of location comparing di- and trialleles phyloP scores.

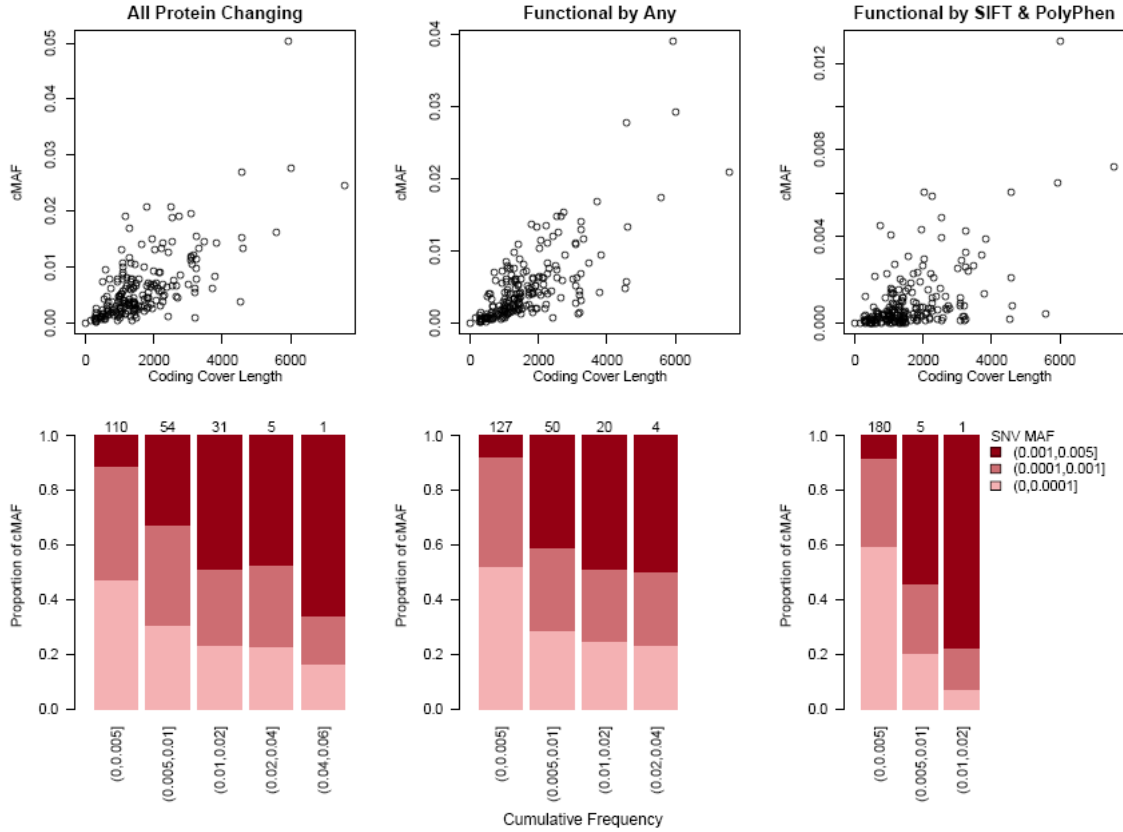

**Fig. S4.**

**Cumulative minor allele frequencies (cMAFs) of rare protein-changing minor alleles.**

Upper row : Cumulative MAFs of uncommon ( $MAF \leq 0.5\%$ ) minor alleles are shown for each gene, including all protein-changing variants, variants predicted to be functional by SIFT, PolyPhen or have a phyloP score  $\geq 2$ , or are predicted to be functional by both SIFT and PolyPhen versus their coding length (successfully sequenced). Lower row: The proportion of rare cumulative MAFs shown in the upper row accounted for by variants with frequencies less than or equal to 0.0001, (0.0001,0.001] and (0.001,0.005] from light to dark red. Gene-level cumulative MAFs are binned into five groups as shown on the x axis. The number of genes with cumulative frequencies falling into each bin is shown above each stacked bar. Genes with cumulative MAFs equal to zero are excluded.

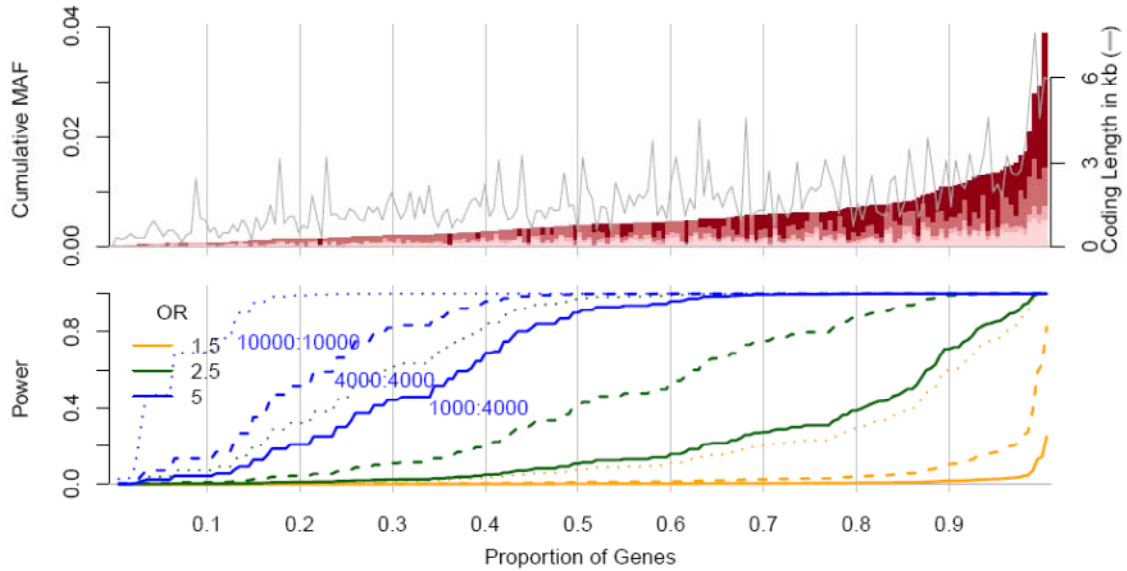

**Fig. S5.**

**Statistical power to conduct a burden test of association.** Cumulative rare variant MAF (cMAF) as described in Fig. 1 and the corresponding statistical power to test each gene for association with a binary outcome given the observed cMAF, a condition with a prevalence of 5%, and a significance threshold of  $0.05/202$  (Bonferroni adjustment for testing all genes in this study). Power is shown with case:control sample sizes of 1000:4000, 4000:4000 and 10,000:10,000.

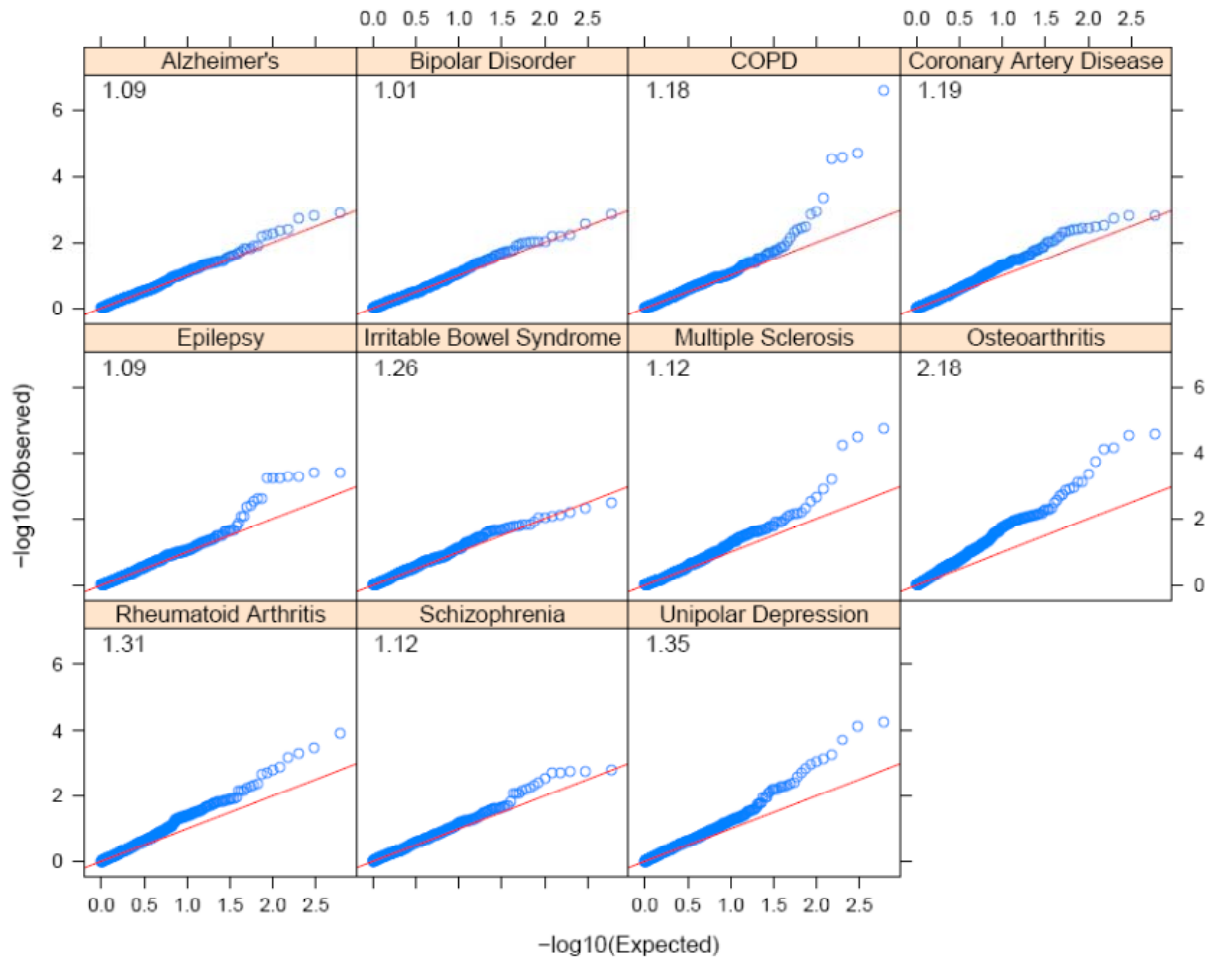

**Fig. S6A.**  
**Distribution of case control association p-values for common variants (MAF > 0.5%).**  
 Genomic control values ( $\lambda$ ) are shown in the upper left corner of each panel.

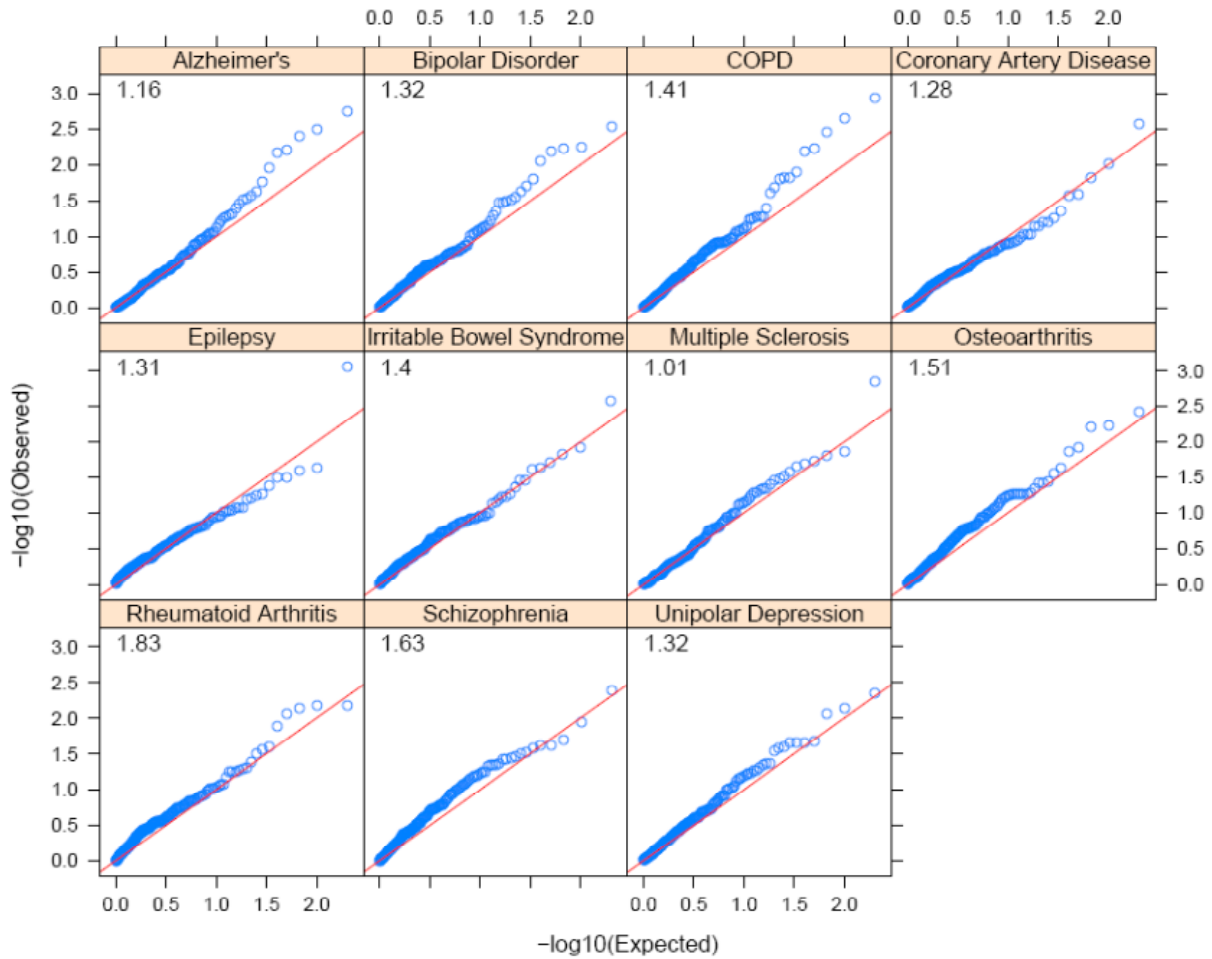

**Fig. S6B.**  
**Distribution of case control association p-values for rare amino acid-changing variants (MAF  $\leq$  0.5%).** Genomic control values ( $\lambda$ ) are shown in the upper left corner of each panel.



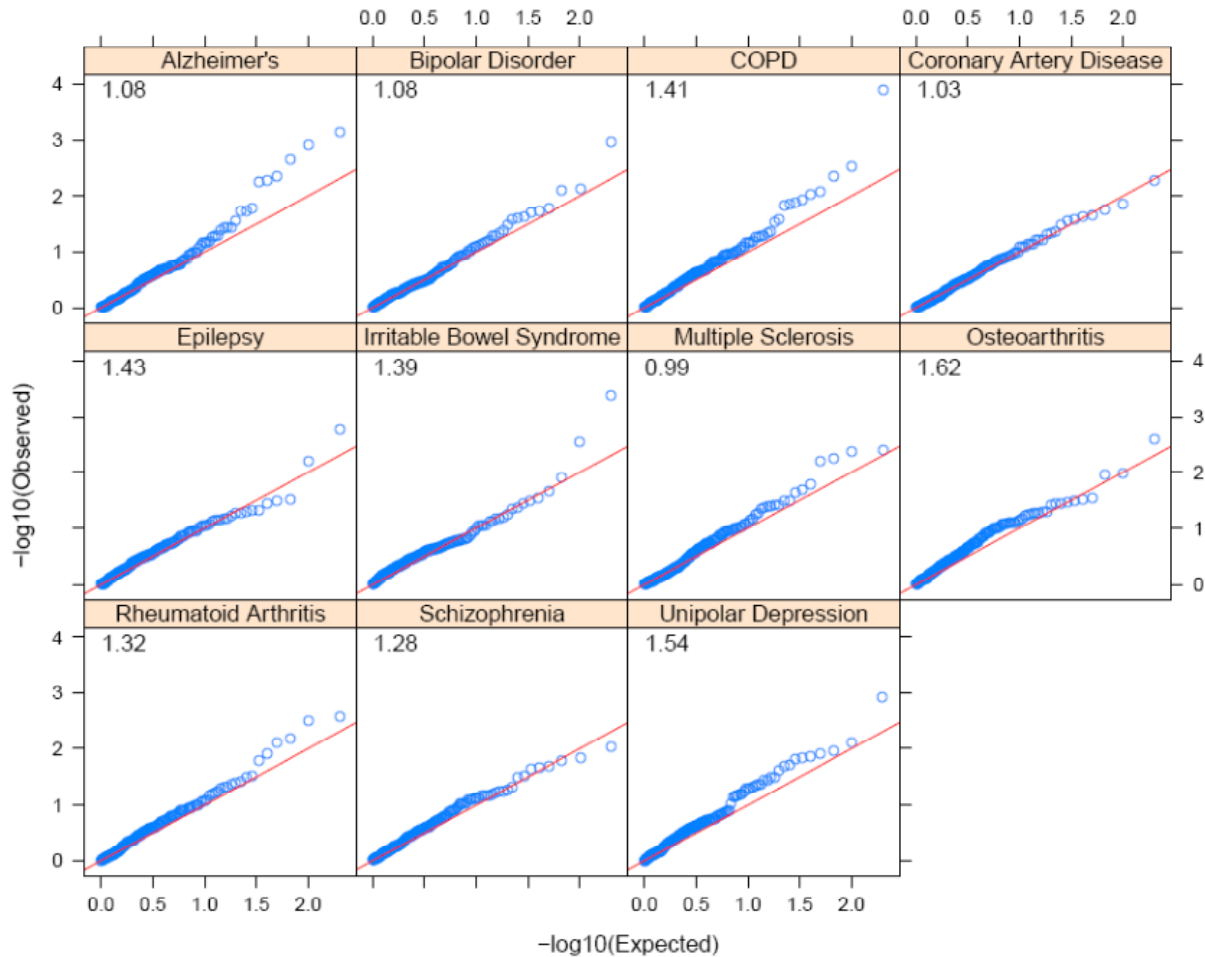

**Fig. S6C.**

**Distribution of case control association p-values for rare amino acid-changing variants (MAF  $\leq$  0.5%) predicted to be functionally damaging.** Genomic control values ( $\lambda$ ) are shown in the upper left corner of each panel. Functionally damaging variants were defined as those predicted to be damaging by SIFT or PolyPhen, or occurring at evolutionary conserved base positions (phyloP  $\geq$  2).

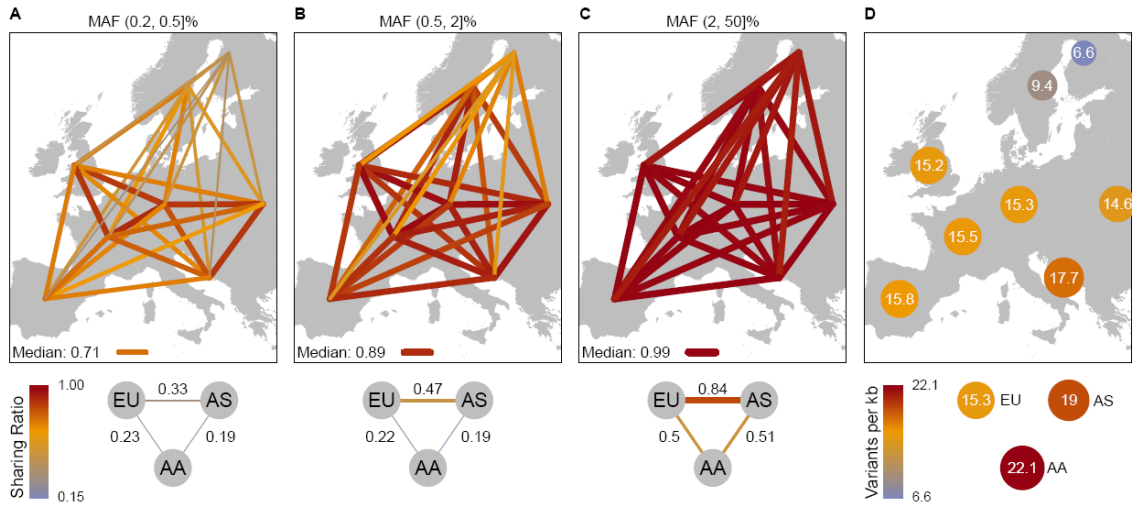

**Fig. S7.**

**Allele sharing and variant abundance.** (A-C) The average allele sharing between pairs of populations for variants in different minor allele frequency bins (MAF) computed as the frequency in the pooled population pair. The sharing between African Americans (AA) or Southern Asia (AS) with Europe (EU) is shown as the median value across the comparisons with each individual population in Europe. (D) The number of variants per kilobase found in population samples of 2,500 individuals.

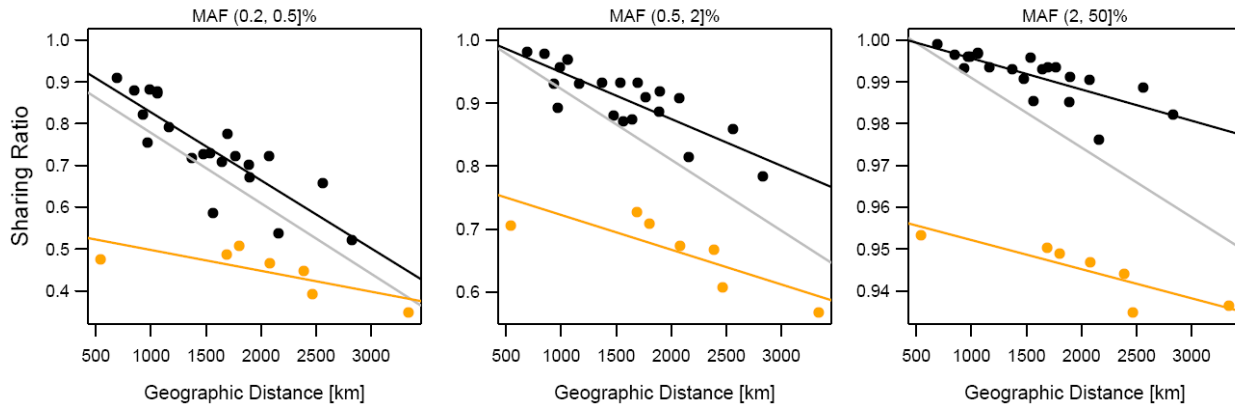

**Fig. S8.**

**Sharing between pairs of European populations decreases with larger geographic distance in Europe.** Each dot represents an edge in Figure 3. Sharing between the Finnish and other European population (orange dots) is generally lower than between other pairs of European populations (black dots). Allele sharing decreases with larger geographic distance, independent of MAF bin (gray lines,  $p < 0.005$  in all cases), after excluding comparisons with the Finnish (black line,  $p < 10^{-4}$ ) or among the comparisons with the Finnish (orange line,  $p < 0.05$ ).

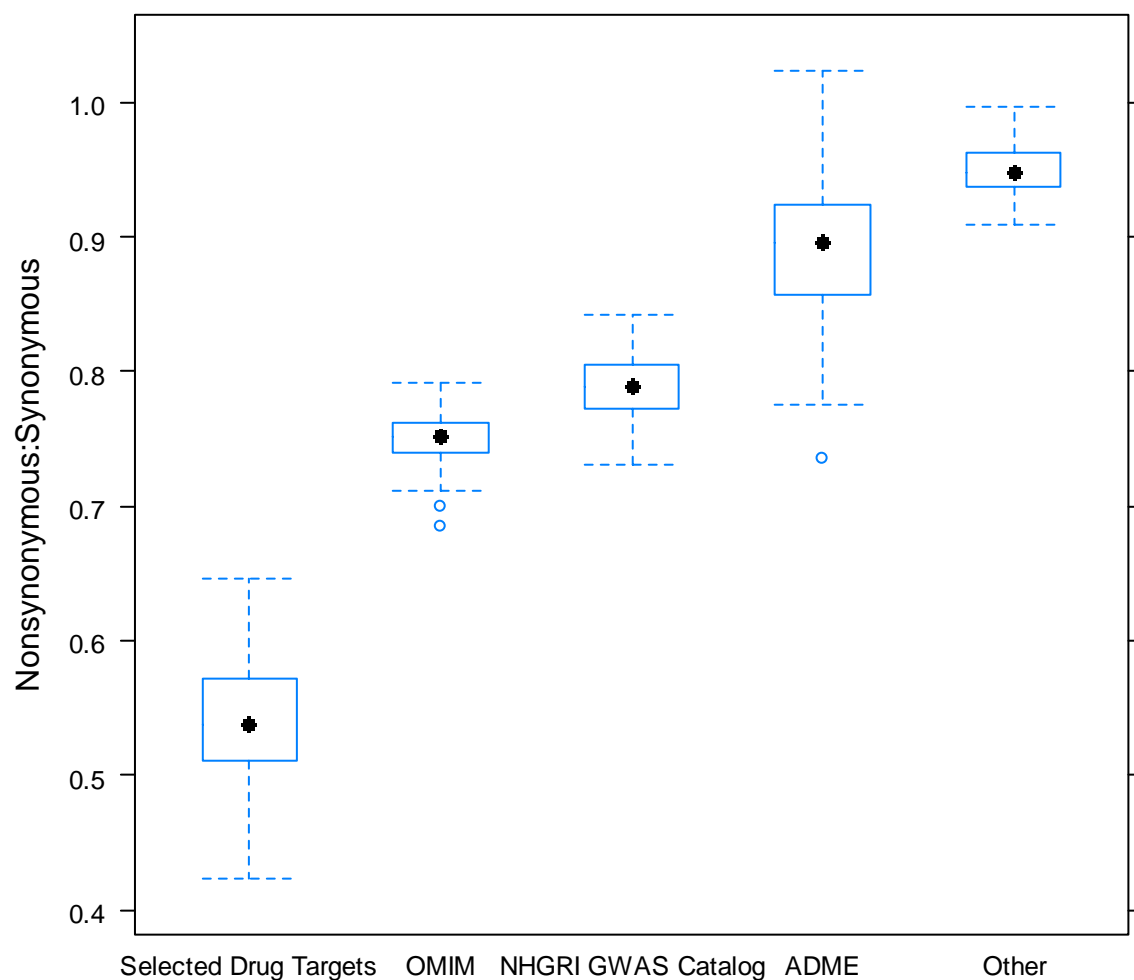

**Fig. S9.**

**Ratio of nonsynonymous to synonymous variant allele carriage between the drug target genes in this study, other groups of genes and the rest of the protein-coding genome.** The distribution of the ratio of non-reference NS and S alleles carried by each CEU subject sequenced at low depth by the 1000 Genomes Project. Ratios were computed for the drug target genes in this study versus OMIM, NHGRI GWAS Catalog, ADME (absorption, distribution, metabolism and excretion; see [www.pharmaadme.org](http://www.pharmaadme.org)), and all other coding genes.

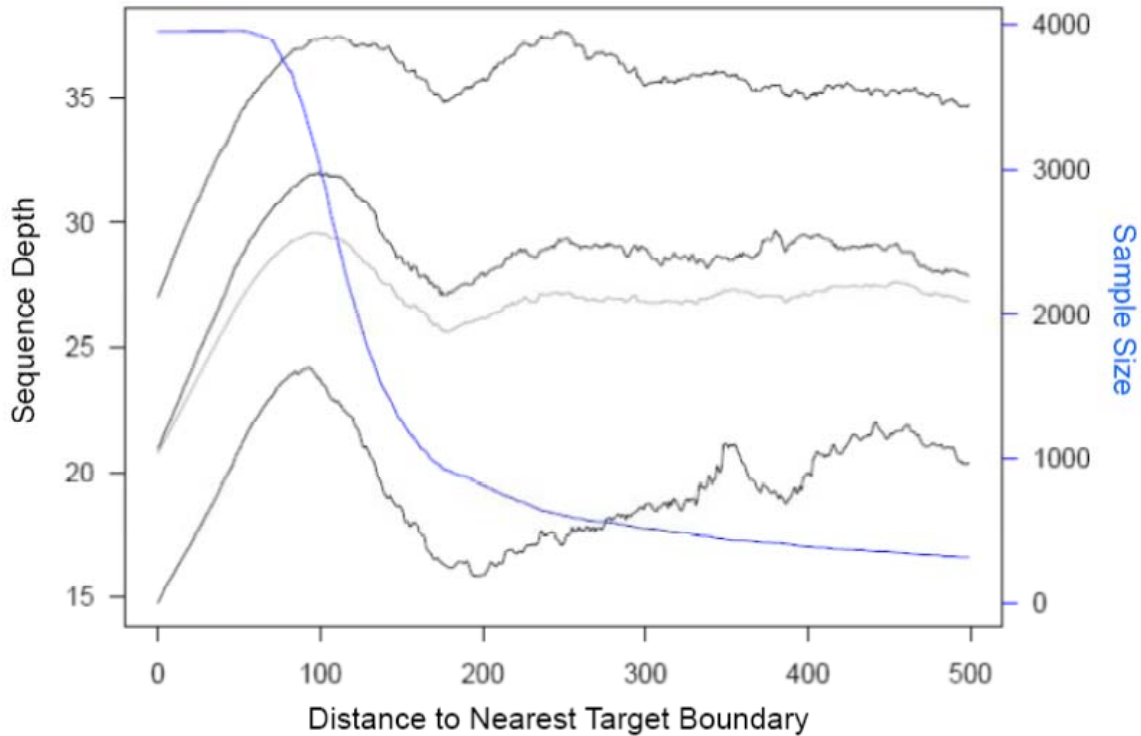

**Fig. S10.**

**Impact of base position relative to target boundaries on sequence depth.** Each sequenced base was rescaled by the number of bases from the nearest target boundary (x axis). Depth distribution summaries for each base position are shown on the y axis, with black lines corresponding to the 25<sup>th</sup>, 50<sup>th</sup>, and 75<sup>th</sup> percentiles and the gray line the mean. The blue line corresponds to the number of observations (i.e. sample size) at each base position. The sample size at a distance of one is two times the number of target regions.

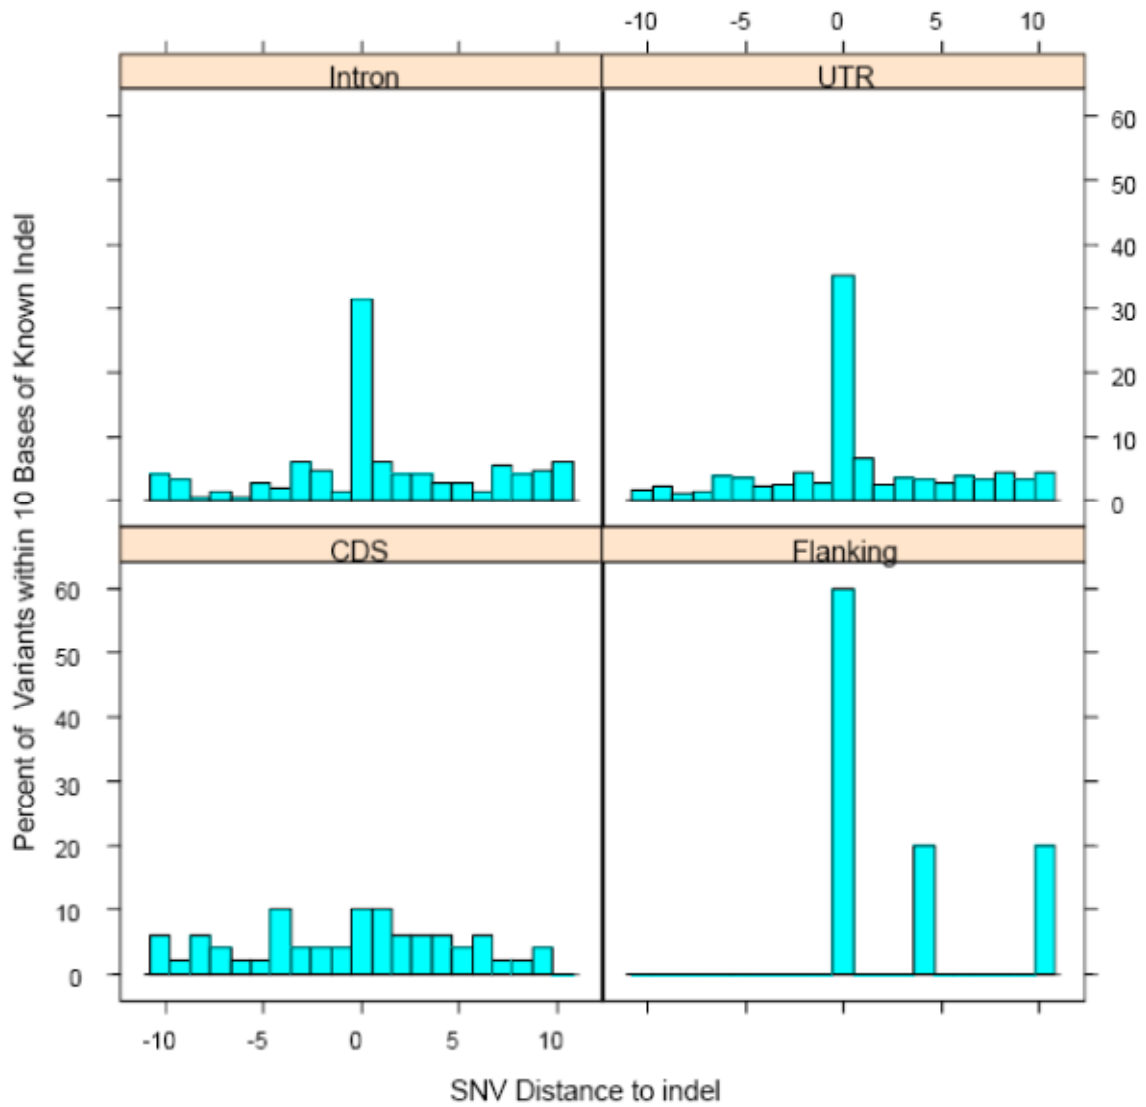

**Fig. S11.**  
**Distribution of SNVs within 10 bp of known indels.** Variants are divided by location in introns, untranslated region exons (UTR), coding exons (CDS) and gene flanking regions.

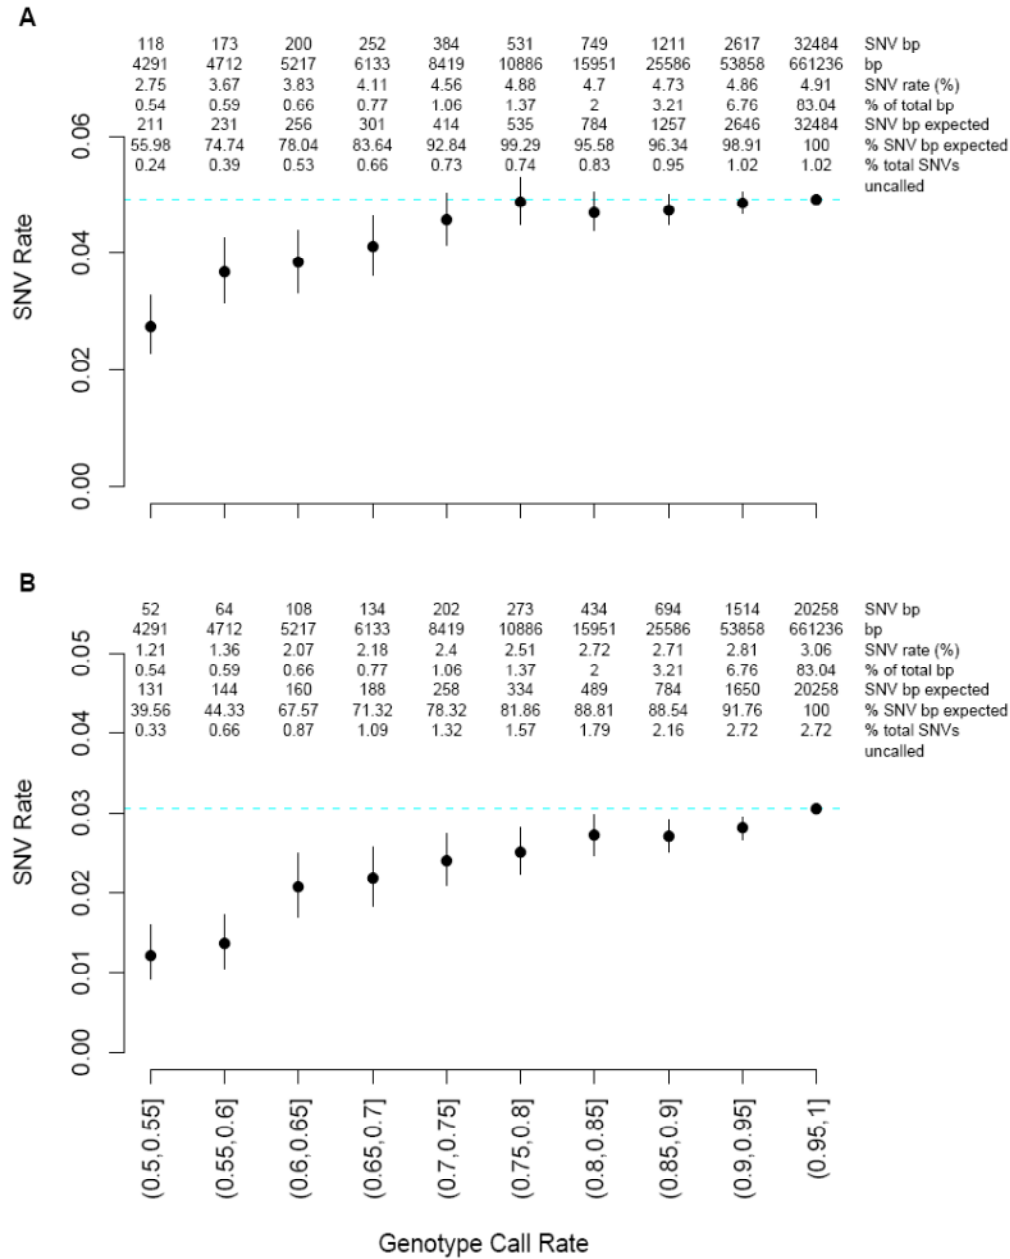

**Fig. S12.**

**Influence of genotype call rates on SNVs discovery rates for (A) all variant and (B) singleton base positions.** The mean SNV rate (dot) and 95% exact confidence interval are presented for bases that fall into each genotype call rate bin. Summary statistics within each call rate bin include, in order, the number of SNV positions, the number of sequenced bases (variable and non-variable), SNV rate, percent of sequenced bases (of total with call rate > 0.5), expected number of SNVs based on positions with >95% call rates, the percent of expected SNVs observed, and the cumulative percentage of uncalled SNVs.

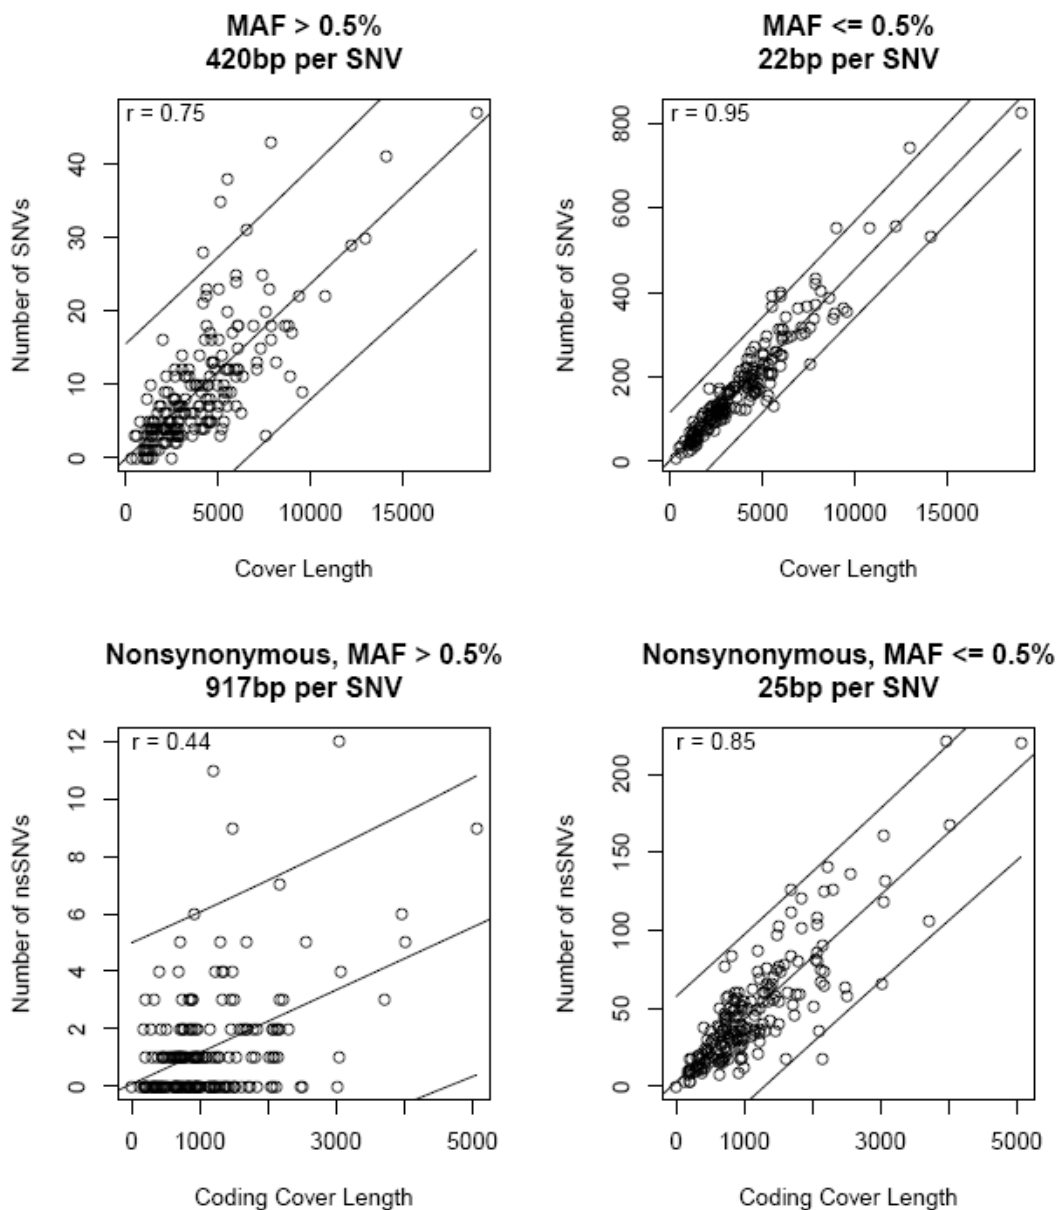

**Fig. S13.**

**Relationship between the length of target sequenced in each gene and the number of SNVs observed in Europeans.** The number of SNVs within successfully sequenced target regions is shown for each gene. The top row corresponds to SNVs observed across all target regions for each gene, and the bottom row to only NS SNVs and coding sequence. The slope of the regression line is given as the number of sequenced bases per SNV. Lines correspond to the ordinary least squares regression line and 99% prediction intervals used to identify outliers.



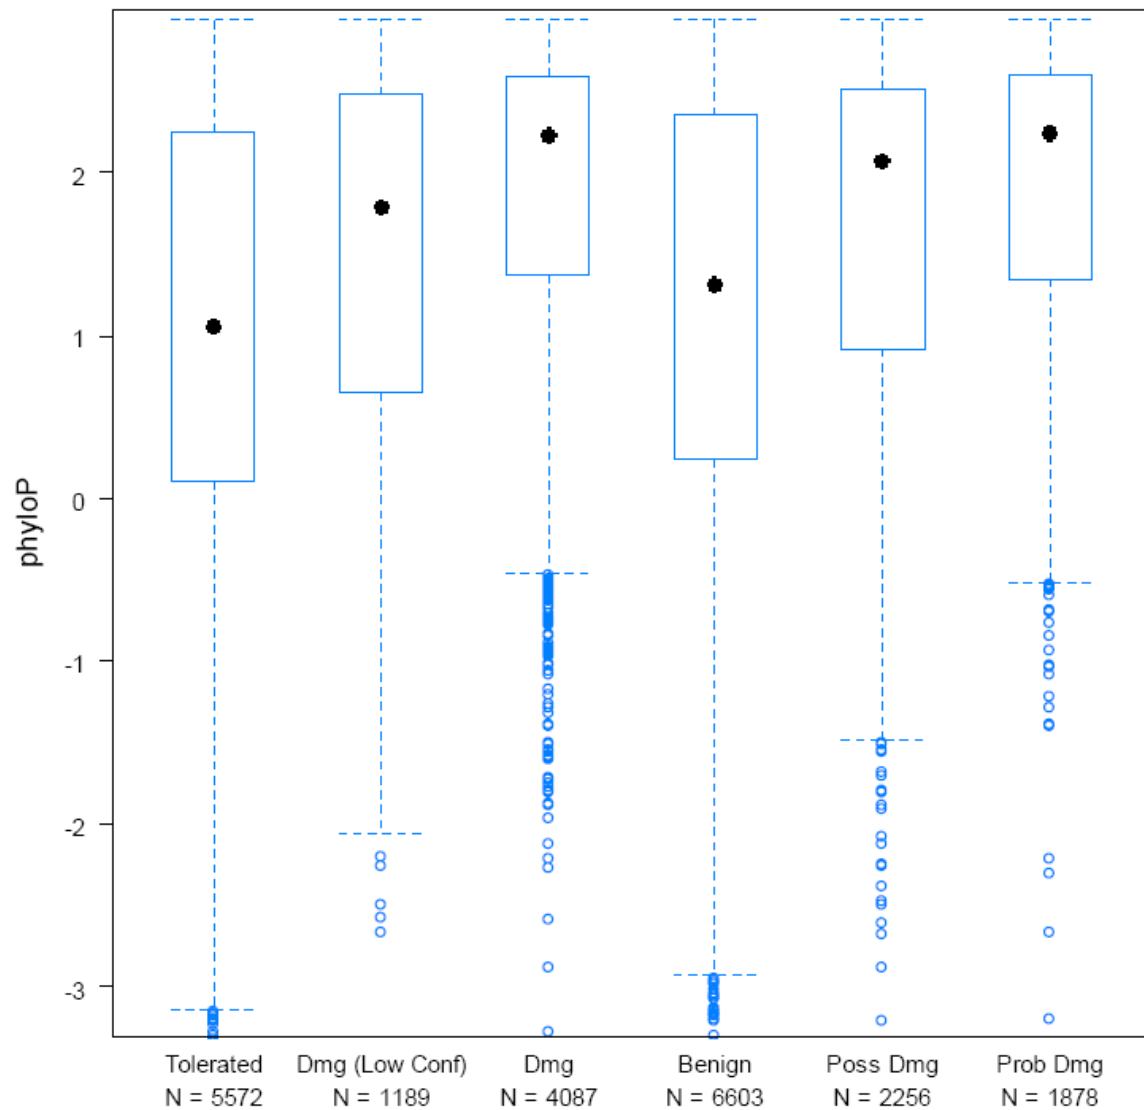

**Fig. S14.**

**Relationship between phyloP conservation scores and SIFT and PolyPhen function**

**predictions.** Lower bars show minimum value that falls within 1.5 times interquartile range (IQR), points that fall below this value, boxes show IQR, black points correspond to the sample median, and upper bars extend to maximum value. Y-axis was truncated at -3 to emphasize differences around IQR; minimum values are as low as -9.5. Tolerated, Dmg (Low Conf) and Dmg correspond to SIFT predictions with scores  $>0.05$ ,  $\leq 0.05$  with low confidence and scores  $\leq 0.05$ , respectively. Benign, Poss Dmg and Prob Dmg correspond to PolyPhen predictions of benign, possibly damaging and probably damaging, respectively.

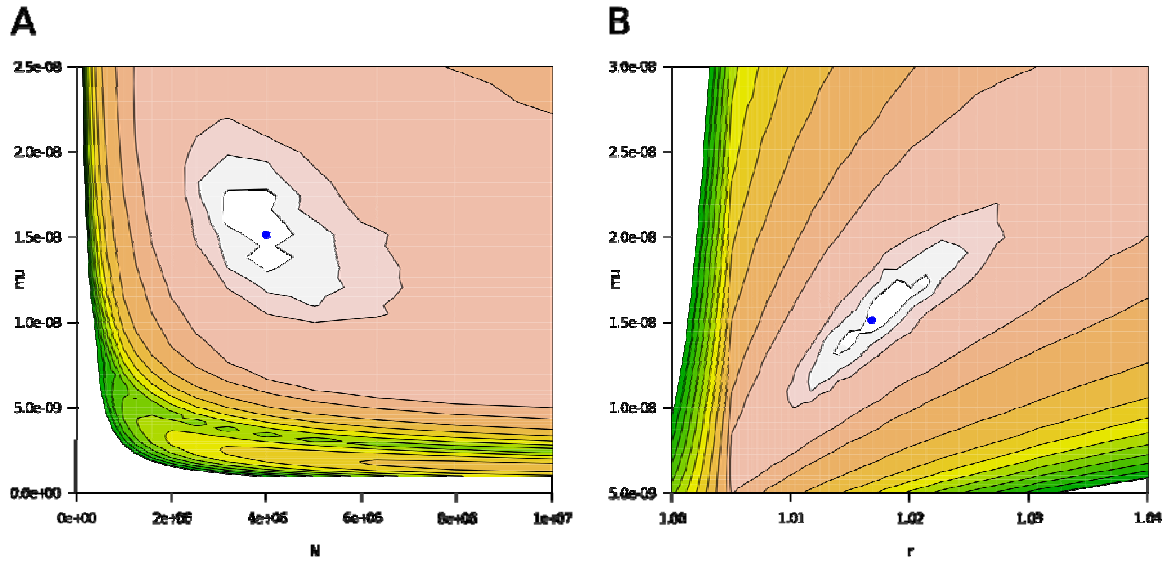

**Fig. S15.**

**Profile likelihood surfaces of  $N_e$  and a single global (A) and of  $r$  and (B).** These surfaces confirm that  $r$  is an identifiable parameter in this inference scheme (i.e. the likelihood surface has a single point maximum as opposed to the ridge along fixed values of  $N_e$  expected in traditional population genetic inference). The blue point depicts the joint MLE and the levels mark  $-2 \cdot 10^0$ ,  $-5 \cdot 10^0$ ,  $-10^1$ ,  $-2 \cdot 10^1$ ,  $-5 \cdot 10^1$ ,  $-10^2$ , ...,  $-10^5$  log-likelihood units lower than the MLE estimate.

**Table S1.**  
Sequenced genes.

| Gene    | Description                                                  | Chrom | Start     | End       | Length | Coding Length |
|---------|--------------------------------------------------------------|-------|-----------|-----------|--------|---------------|
| ABCB1   | ATP-binding Cassette, Sub-family B, Member 1                 | 7     | 86970884  | 87180500  | 209616 | 3843          |
| ADAM10  | ADAM Metallopeptidase Domain 10                              | 15    | 56675802  | 56829469  | 153667 | 2247          |
| ADIPOQ  | Adiponectin, C1Q And Collagen Domain Containing              | 3     | 188043157 | 188058946 | 15789  | 735           |
| ADORA1  | Adenosine A1 Receptor                                        | 1     | 201326405 | 201403156 | 76752  | 981           |
| ADORA2A | Adenosine A2a Receptor                                       | 22    | 22996866  | 23168325  | 171460 | 4593          |
| ADRB3   | Adrenergic, Beta-3-, Receptor                                | 8     | 37939673  | 37943341  | 3668   | 1227          |
| ALOX5AP | Arachidonate 5-lipoxygenase-activating Protein               | 13    | 30207669  | 30236556  | 28887  | 486           |
| APCS    | Amyloid P Component, Serum                                   | 1     | 157824240 | 157825285 | 1045   | 672           |
| APH1A   | Anterior Pharynx Defective 1 Homolog A                       | 1     | 148504423 | 148508156 | 3733   | 809           |
| APH1B   | Anterior Pharynx Defective 1 Homolog B                       | 15    | 61356844  | 61385807  | 28964  | 774           |
| APP     | Amyloid Beta (A4) Precursor Protein                          | 21    | 26174732  | 26465003  | 290271 | 2313          |
| BDKRB2  | Bradykinin Receptor B2                                       | 14    | 95740950  | 95780542  | 39592  | 1176          |
| BICD1   | Bicaudal D Homolog 1                                         | 12    | 32151448  | 32422408  | 270961 | 2928          |
| BRD2    | Bromodomain Containing 2                                     | 6     | 33044415  | 33057059  | 12645  | 2406          |
| BRD3    | Bromodomain Containing 3                                     | 9     | 135887784 | 135922913 | 35130  | 2181          |
| BRD4    | Bromodomain Containing 4                                     | 19    | 15209301  | 15252262  | 42962  | 4100          |
| C5AR1   | Complement Component 5a Receptor 1                           | 19    | 52504944  | 52517167  | 12223  | 1053          |
| CACNA1B | Calcium Channel, Voltage-dependent, N Type, Alpha 1B Subunit | 9     | 139892062 | 140138897 | 246836 | 7020          |
| CAMKK2  | Calcium/calmodulin-dependent Protein Kinase Kinase 2, Beta   | 12    | 120159878 | 120220494 | 60616  | 1773          |
| CASR    | Calcium-sensing Receptor                                     | 3     | 123385220 | 123488032 | 102812 | 3237          |
| CCKAR   | Cholecystokinin A Receptor                                   | 4     | 26092116  | 26101140  | 9024   | 1287          |
| CCKBR   | Cholecystokinin B Receptor                                   | 11    | 6237542   | 6249932   | 12390  | 1344          |
| CCL11   | Chemokine (C-C Motif) Ligand 11                              | 17    | 29636800  | 29639312  | 2512   | 294           |
| CCL7    | Chemokine (C-C Motif) Ligand 7                               | 17    | 29621353  | 29623373  | 2021   | 300           |
| CCL8    | Chemokine (C-C Motif) Ligand 8                               | 17    | 29670168  | 29672534  | 2367   | 300           |

|         |                                             |    |           |           |         |      |
|---------|---------------------------------------------|----|-----------|-----------|---------|------|
| CCR1    | Chemokine (C-C Motif)<br>Receptor 1         | 3  | 46218204  | 46224836  | 6632    | 1068 |
| CCR3    | Chemokine (C-C Motif)<br>Receptor 3         | 3  | 46227186  | 46283166  | 55981   | 1068 |
| CCR5    | Chemokine (C-C Motif)<br>Receptor 5         | 3  | 46386637  | 46392701  | 6064    | 1059 |
| CCR9    | Chemokine (C-C Motif)<br>Receptor 9         | 3  | 45903023  | 45919671  | 16648   | 1110 |
| CD28    | CD28 Molecule                               | 2  | 204279443 | 204310801 | 31358   | 663  |
| CD3D    | CD3d Molecule, Delta                        | 11 | 117714999 | 117718669 | 3670    | 516  |
| CD3E    | CD3e Molecule, Epsilon                      | 11 | 117680656 | 117692100 | 11445   | 624  |
| CD3G    | CD3g Molecule, Gamma                        | 11 | 117720311 | 117729979 | 9669    | 549  |
| CD4     | CD4 Molecule                                | 12 | 6768912   | 6800237   | 31325   | 1377 |
| CDH2    | Cadherin 2, Type 1, N-cadherin              | 18 | 23784933  | 24011189  | 226256  | 2721 |
| CHRM3   | Cholinergic Receptor,<br>Muscarinic 3       | 1  | 237858996 | 238139343 | 280347  | 1773 |
| CHRM4   | Cholinergic Receptor,<br>Muscarinic 4       | 11 | 46363216  | 46364734  | 1519    | 1440 |
| CHRNA3  | Cholinergic Receptor, Nicotinic,<br>Alpha 3 | 15 | 76674706  | 76700377  | 25671   | 1518 |
| CHRNA4  | Cholinergic Receptor, Nicotinic,<br>Alpha 4 | 20 | 61445109  | 61463192  | 18083   | 1884 |
| CHRNA5  | Cholinergic Receptor, Nicotinic,<br>Alpha 5 | 15 | 76644961  | 76673515  | 28554   | 1407 |
| CHRNA6  | Cholinergic Receptor, Nicotinic,<br>Alpha 6 | 8  | 42726920  | 42742776  | 15856   | 1485 |
| CHRNA7  | Cholinergic Receptor, Nicotinic,<br>Alpha 7 | 15 | 30110018  | 30248541  | 138523  | 1509 |
| CHRNB2  | Cholinergic Receptor, Nicotinic,<br>Beta 2  | 1  | 152806881 | 152818978 | 12097   | 1509 |
| CLEC16A | C-type Lectin Domain Family<br>16, Member A | 16 | 10945846  | 11183547  | 237702  | 3162 |
| CNR2    | Cannabinoid Receptor 2                      | 1  | 24073047  | 24112404  | 39357   | 1083 |
| CNTN5   | Contactin 5                                 | 11 | 98397081  | 99732683  | 1335603 | 3303 |
| CTSK    | Cathepsin K                                 | 1  | 149035311 | 149047436 | 12125   | 990  |
| CXCL1   | Chemokine (C-X-C Motif)<br>Ligand 1         | 4  | 74953973  | 74968249  | 14277   | 324  |
| CXCL2   | Chemokine (C-X-C Motif)<br>Ligand 2         | 4  | 75181616  | 75183861  | 2245    | 324  |
| CXCL3   | Chemokine (C-X-C Motif)<br>Ligand 3         | 4  | 75121170  | 75123354  | 2184    | 324  |
| CXCL5   | Chemokine (C-X-C Motif)<br>Ligand 5         | 4  | 75080223  | 75083286  | 3064    | 345  |
| CYSLTR1 | Cysteinyl Leukotriene Receptor<br>1         | X  | 77414786  | 77469743  | 54957   | 1014 |
| CYSLTR2 | Cysteinyl Leukotriene Receptor<br>2         | 13 | 48178952  | 48181499  | 2547    | 1041 |
| DPP3    | Dipeptidyl-peptidase 3                      | 11 | 66004456  | 66033706  | 29250   | 2214 |
| DPP4    | Dipeptidyl-peptidase 4                      | 2  | 162557001 | 162639298 | 82297   | 2301 |

|         |                                                                         |    |           |           |        |      |
|---------|-------------------------------------------------------------------------|----|-----------|-----------|--------|------|
| DRD2    | Dopamine Receptor D2                                                    | 11 | 112785527 | 112851103 | 65577  | 1332 |
| DRD3    | Dopamine Receptor D3                                                    | 3  | 115330247 | 115380589 | 50342  | 1203 |
| DYRK3   | Dual-specificity Tyrosine-(Y)-<br>phosphorylation Regulated<br>Kinase 3 | 1  | 204875504 | 204889165 | 13662  | 1784 |
| EDG1    | Sphingosine-1-phosphate<br>Receptor 1                                   | 1  | 101475043 | 101479662 | 4619   | 1149 |
| EDNRA   | Endothelin Receptor Type A                                              | 4  | 148621575 | 148685555 | 63980  | 1284 |
| EDNRB   | Endothelin Receptor Type B                                              | 13 | 77367617  | 77447665  | 80049  | 1446 |
| EGR1    | Early Growth Response 1                                                 | 5  | 137829080 | 137832903 | 3823   | 1632 |
| ELA2    | Elastase, Neutrophil Expressed<br>Ecotropic Viral Integration Site<br>5 | 19 | 803291    | 807246    | 3955   | 804  |
| EVI5    |                                                                         | 1  | 92746841  | 93030549  | 283708 | 2433 |
| FAAH    | Fatty Acid Amide Hydrolase                                              | 1  | 46632575  | 46652104  | 19529  | 1740 |
| FGF10   | Fibroblast Growth Factor 10                                             | 5  | 44340831  | 44424623  | 83793  | 627  |
| FH      | Fumarate Hydratase                                                      | 1  | 239727526 | 239749677 | 22151  | 1533 |
| GABRA2  | Gamma-aminobutyric Acid<br>(GABA) A Receptor, Alpha 2                   | 4  | 45946341  | 46086702  | 140362 | 1356 |
| GABRA3  | Gamma-aminobutyric Acid<br>(GABA) A Receptor, Alpha 3                   | X  | 151086290 | 151370993 | 284704 | 1479 |
| GHSR    | Growth Hormone Secretagogue<br>Receptor                                 | 3  | 173645617 | 173648940 | 3324   | 1175 |
| GJD2    | Gap Junction Protein, Delta 2,<br>36kDa                                 | 15 | 32831934  | 32834074  | 2141   | 966  |
| GLP1R   | Glucagon-like Peptide 1<br>Receptor                                     | 6  | 39124595  | 39163498  | 38903  | 1392 |
| GPBAR1  | G Protein-coupled Bile Acid<br>Receptor 1                               | 2  | 218833983 | 218836826 | 2843   | 992  |
| GPR109A | G Protein-coupled Receptor<br>109A                                      | 12 | 121751793 | 121753857 | 2064   | 1092 |
| GPR119  | G Protein-coupled Receptor 119                                          | X  | 129346095 | 129347102 | 1007   | 1008 |
| GRIN1   | Glutamate Receptor, Ionotropic,<br>N-methyl D-aspartate 1               | 9  | 139152663 | 139183029 | 30367  | 2886 |
| GRIN2B  | Glutamate Receptor, Ionotropic,<br>N-methyl D-aspartate 2B              | 12 | 13605411  | 14024319  | 418908 | 4455 |
| GRM5    | Glutamate Receptor,<br>Metabotropic 5                                   | 11 | 87880626  | 88420838  | 540213 | 3543 |
| GSK3B   | Glycogen Synthase Kinase 3<br>Beta[Homo Sapiens]                        | 3  | 121028233 | 121295954 | 267722 | 1302 |
| HCRTR1  | Hypocretin Receptor 1                                                   | 1  | 31855888  | 31865508  | 9621   | 1278 |
| HCRTR2  | Hypocretin Receptor 2                                                   | 6  | 55147025  | 55255377  | 108353 | 1335 |
| HHIP    | Hedgehog Interacting Protein                                            | 4  | 145786623 | 145879337 | 92715  | 2103 |
| HRH1    | Histamine Receptor H1                                                   | 3  | 11153779  | 11280243  | 126465 | 1464 |
| HRH3    | Histamine Receptor H3                                                   | 20 | 60223421  | 60228718  | 5297   | 1338 |
| HTR1A   | 5-hydroxytryptamine (serotonin)<br>Receptor 1A                          | 5  | 63292034  | 63293302  | 1268   | 1269 |

|          |                                                                                                    |    |           |           |        |      |
|----------|----------------------------------------------------------------------------------------------------|----|-----------|-----------|--------|------|
| HTR1B    | 5-hydroxytryptamine (serotonin)<br>Receptor 1B                                                     | 6  | 78228641  | 78229900  | 1260   | 1173 |
| HTR2C    | 5-hydroxytryptamine (serotonin)<br>Receptor 2C                                                     | X  | 113724807 | 114050880 | 326074 | 1377 |
| HTR4     | 5-hydroxytryptamine (serotonin)<br>Receptor 4                                                      | 5  | 147810788 | 148013934 | 203146 | 1489 |
| HTR6     | 5-hydroxytryptamine (serotonin)<br>Receptor 6                                                      | 1  | 19864367  | 19878642  | 14275  | 1323 |
| IKBKB    | Inhibitor Of Kappa Light<br>Polypeptide Gene Enhancer In<br>B-cells, Kinase Beta                   | 8  | 42247986  | 42309122  | 61136  | 2271 |
| IL13     | Interleukin 13                                                                                     | 5  | 132021764 | 132024700 | 2936   | 441  |
| IL18     | Interleukin 18                                                                                     | 11 | 111519186 | 111540050 | 20865  | 582  |
| IL1R1    | Interleukin 1 Receptor, Type I<br>Interleukin 23, Alpha Subunit                                    | 2  | 102125678 | 102162766 | 37089  | 1710 |
| IL23A    | P19                                                                                                | 12 | 55018926  | 55020461  | 1536   | 570  |
| IL28B    | Interleukin 28B                                                                                    | 19 | 44426033  | 44427609  | 1577   | 591  |
| IL4      | Interleukin 4                                                                                      | 5  | 132037272 | 132046267 | 8995   | 462  |
| IL5      | Interleukin 5                                                                                      | 5  | 131905035 | 131907113 | 2078   | 405  |
| IL6      | Interleukin 6                                                                                      | 7  | 22732028  | 22738145  | 6118   | 639  |
| IL7R     | Interleukin 7 Receptor                                                                             | 5  | 35892748  | 35912681  | 19933  | 1380 |
| IL8      | Interleukin 8                                                                                      | 4  | 74825139  | 74828297  | 3158   | 300  |
| IL8RB    | Chemokine (C-X-C Motif)<br>Receptor 2                                                              | 2  | 218698991 | 218710220 | 11229  | 1083 |
| ITGA4    | Integrin, Alpha 4                                                                                  | 2  | 182029864 | 182110719 | 80855  | 3099 |
| ITGAV    | Integrin, Alpha V                                                                                  | 2  | 187163045 | 187253873 | 90828  | 3147 |
| ITGB1    | Integrin, Beta 1                                                                                   | 10 | 33229326  | 33287204  | 57878  | 2627 |
| JAK3     | Janus Kinase 3                                                                                     | 19 | 17797961  | 17819800  | 21839  | 3375 |
| KCNC2    | Potassium Voltage-gated<br>Channel, Shaw-related<br>Subfamily, Member 2                            | 12 | 73720163  | 73889778  | 169615 | 1979 |
| KCNMA1   | Potassium Large Conductance<br>Calcium-activated Channel,<br>Subfamily M, Alpha Member 1           | 10 | 78299366  | 79067757  | 768392 | 3574 |
| KCNN4    | Potassium Intermediate/small<br>Conductance Calcium-activated<br>Channel, Subfamily N, Member<br>4 | 19 | 48962525  | 48977249  | 14724  | 1284 |
| KIAA1967 | KIAA1967                                                                                           | 8  | 22518202  | 22533929  | 15727  | 2772 |
| L1CAM    | L1 Cell Adhesion Molecule                                                                          | X  | 152780163 | 152804802 | 24640  | 3774 |
| LDHA     | Lactate Dehydrogenase A                                                                            | 11 | 18372687  | 18385969  | 13282  | 999  |
| LEP      | Leptin                                                                                             | 7  | 127668567 | 127684917 | 16350  | 504  |
| LRRK2    | Leucine-rich Repeat Kinase 2                                                                       | 12 | 38905081  | 39049354  | 144273 | 7584 |
| MAG      | Myelin Associated Glycoprotein                                                                     | 19 | 40474868  | 40496547  | 21680  | 1914 |
| MAPK11   | Mitogen-activated Protein<br>Kinase 11                                                             | 22 | 49044269  | 49050949  | 6681   | 1095 |

|         |                                                                                     |    |           |           |         |      |
|---------|-------------------------------------------------------------------------------------|----|-----------|-----------|---------|------|
| MAPK14  | Mitogen-activated Protein Kinase 14                                                 | 6  | 36103551  | 36186513  | 82962   | 1216 |
| MCHR1   | Melanin-concentrating Hormone Receptor 1                                            | 22 | 39405045  | 39408764  | 3720    | 1269 |
| MCHR2   | Melanin-concentrating Hormone Receptor 2                                            | 6  | 100474507 | 100548835 | 74328   | 1023 |
| METAP2  | Methionyl Aminopeptidase 2                                                          | 12 | 94391953  | 94433746  | 41793   | 1437 |
| MIF     | Macrophage Migration Inhibitory Factor                                              | 22 | 22566565  | 22567409  | 844     | 348  |
| MLNR    | Motilin Receptor                                                                    | 13 | 48692475  | 48694514  | 2039    | 1239 |
| MME     | Membrane Metallo-endopeptidase                                                      | 3  | 156280130 | 156384212 | 104082  | 2253 |
| MMP12   | Matrix Metallopeptidase 12                                                          | 11 | 102238674 | 102250922 | 12248   | 1412 |
| MMP9    | Matrix Metallopeptidase 9                                                           | 20 | 44070954  | 44078607  | 7653    | 2124 |
| MS4A1   | Membrane-spanning 4-domains, Subfamily A, Member 1                                  | 11 | 59979858  | 59994801  | 14944   | 894  |
| NCSTN   | Nicastrin                                                                           | 1  | 158579687 | 158595366 | 15679   | 2130 |
| NFKBIL1 | Nuclear Factor Of Kappa Light Polypeptide Gene Enhancer In B-cells Inhibitor-like 1 | 6  | 31622626  | 31634585  | 11960   | 1146 |
| NLRP1   | NLR Family, Pyrin Domain Containing 1                                               | 17 | 5345443   | 5428556   | 83113   | 4493 |
| NLRP3   | NLR Family, Pyrin Domain Containing 3                                               | 1  | 245646098 | 245679033 | 32935   | 3111 |
| NMNAT2  | Nicotinamide Nucleotide Adenylyltransferase 2                                       | 1  | 181484001 | 181654360 | 170360  | 994  |
| NOS2A   | Nitric Oxide Synthase 2, Inducible                                                  | 17 | 23107919  | 23151682  | 43763   | 3462 |
| NR1D1   | Nuclear Receptor Subfamily 1, Group D, Member 1                                     | 17 | 35502567  | 35510499  | 7932    | 1845 |
| NRXN1   | Neurexin 1                                                                          | 2  | 50000992  | 51113178  | 1112187 | 4693 |
| NTRK2   | Neurotrophic Tyrosine Kinase, Receptor, Type 2                                      | 9  | 86473286  | 86828325  | 355039  | 2584 |
| OPRK1   | Opioid Receptor, Kappa 1                                                            | 8  | 54300829  | 54326747  | 25918   | 1143 |
| OPRM1   | Opioid Receptor, Mu 1                                                               | 6  | 154402136 | 154609693 | 207557  | 1488 |
| OSM     | Oncostatin M                                                                        | 22 | 28988818  | 28992840  | 4022    | 759  |
| OXTR    | Oxytocin Receptor                                                                   | 3  | 8767094   | 8786300   | 19206   | 1170 |
| P2RX7   | Purinergic Receptor P2X, Ligand-gated Ion Channel, 7                                | 12 | 120055061 | 120108259 | 53198   | 1788 |
| P4HA1   | Prolyl 4-hydroxylase, Alpha Polypeptide I                                           | 10 | 74436981  | 74526630  | 89650   | 1676 |
| P4HA2   | Prolyl 4-hydroxylase, Alpha Polypeptide II                                          | 5  | 131555430 | 131591455 | 36026   | 1668 |
| P4HB    | Prolyl 4-hydroxylase, Beta Polypeptide                                              | 17 | 77394323  | 77411833  | 17510   | 1527 |
| PDE4A   | Phosphodiesterase 4A, CAMP-specific                                                 | 19 | 10392333  | 10441306  | 48974   | 2969 |

|        |                                                                               |    |           |           |        |      |
|--------|-------------------------------------------------------------------------------|----|-----------|-----------|--------|------|
| PDE5A  | Phosphodiesterase 5A, CGMP-specific                                           | 4  | 120634998 | 120769429 | 134431 | 2654 |
| PGK1   | Phosphoglycerate Kinase 1                                                     | X  | 77246425  | 77268980  | 22555  | 1254 |
| PIK3CA | Phosphoinositide-3-kinase, Catalytic, Alpha Polypeptide                       | 3  | 180349005 | 180435194 | 86189  | 3207 |
| PLA2G7 | Phospholipase A2, Group VII                                                   | 6  | 46780068  | 46811069  | 31002  | 1326 |
| PPARD  | Peroxisome Proliferator-activated Receptor Delta                              | 6  | 35418313  | 35503933  | 85621  | 1326 |
| PRKAG1 | Protein Kinase, AMP-activated, Gamma 1 Non-catalytic Subunit                  | 12 | 47682322  | 47698863  | 16542  | 996  |
| PSEN1  | Presenilin 1                                                                  | 14 | 72672908  | 72756862  | 83955  | 1404 |
| PSEN2  | Presenilin 2                                                                  | 1  | 225124896 | 225150429 | 25534  | 1347 |
| PSENE1 | Presenilin Enhancer 2 Homolog (C. Elegans)                                    | 19 | 40928334  | 40929743  | 1409   | 306  |
| PTGDR  | Prostaglandin D2 Receptor                                                     | 14 | 51804181  | 51813192  | 9011   | 1080 |
| PTGER1 | Prostaglandin E Receptor 1                                                    | 19 | 14444278  | 14447174  | 2896   | 1209 |
| PTGES  | Prostaglandin E Synthase                                                      | 9  | 131540433 | 131555165 | 14732  | 459  |
| PTGIR  | Prostaglandin I2 (prostacyclin) Receptor                                      | 19 | 51815565  | 51820194  | 4629   | 1161 |
| PTGS1  | Prostaglandin-endoperoxide Synthase 1                                         | 9  | 124173050 | 124197802 | 24752  | 1800 |
| PTGS2  | Prostaglandin-endoperoxide Synthase 2                                         | 1  | 184907592 | 184916179 | 8587   | 1815 |
| PTH1R  | Parathyroid Hormone 1 Receptor                                                | 3  | 46894240  | 46920293  | 26054  | 1782 |
| PYGB   | Phosphorylase, Glycogen; Brain Receptor-interacting Serine-threonine Kinase 2 | 20 | 25176706  | 25226648  | 49942  | 2532 |
| RIPK2  | RAR-related Orphan Receptor A                                                 | 8  | 90839110  | 90872433  | 33323  | 1623 |
| RORA   | RAR-related Orphan Receptor A                                                 | 15 | 58576755  | 59308794  | 732039 | 2032 |
| RORC   | RAR-related Orphan Receptor C                                                 | 1  | 150045171 | 150070972 | 25802  | 1564 |
| RTN4   | Reticulon 4                                                                   | 2  | 55052829  | 55131468  | 78640  | 3613 |
| SCD    | Stearoyl-CoA Desaturase                                                       | 10 | 102096762 | 102114578 | 17816  | 1080 |
| SCN9A  | Sodium Channel, Voltage-gated, Type IX, Alpha Subunit                         | 2  | 166759941 | 166940749 | 180809 | 5934 |
| SDHB   | Succinate Dehydrogenase Complex, Subunit B, Iron Sulfur                       | 1  | 17217804  | 17253252  | 35448  | 843  |
| SDHD   | Succinate Dehydrogenase Complex, Subunit D, Integral Membrane Protein         | 11 | 111462832 | 111471727 | 8895   | 480  |
| SIRT1  | Sirtuin 1                                                                     | 10 | 69314433  | 69348149  | 33716  | 2244 |
| SIRT2  | Sirtuin 2                                                                     | 19 | 44061037  | 44082342  | 21306  | 1171 |
| SIRT3  | Sirtuin 3                                                                     | 11 | 205030    | 226362    | 21332  | 1200 |
| SIRT4  | Sirtuin 4                                                                     | 12 | 119224546 | 119235430 | 10885  | 945  |
| SIRT5  | Sirtuin 5                                                                     | 6  | 13682812  | 13720500  | 37688  | 976  |
| SIRT6  | Sirtuin 6                                                                     | 19 | 4125106   | 4133596   | 8490   | 1068 |
| SIRT7  | Sirtuin 7                                                                     | 17 | 77463107  | 77469332  | 6225   | 1203 |



|          |                                                                    |    |           |           |        |      |
|----------|--------------------------------------------------------------------|----|-----------|-----------|--------|------|
| SLC10A1  | Solute Carrier Family 10, Member 1                                 | 14 | 69312305  | 69333759  | 21455  | 1050 |
| SLC10A2  | Solute Carrier Family 10, Member 2                                 | 13 | 102494351 | 102517197 | 22846  | 1047 |
| SLC5A1   | Solute Carrier Family 5, Member 1                                  | 22 | 30769259  | 30836645  | 67386  | 1995 |
| SLC6A4   | Solute Carrier Family 6, Member 4                                  | 17 | 25545463  | 25586841  | 41379  | 1893 |
| SLC6A9   | Solute Carrier Family 6, Member 9                                  | 1  | 44234742  | 44269721  | 34979  | 2151 |
| SP110    | SP110 Nuclear Body Protein                                         | 2  | 230741896 | 230792932 | 51036  | 2202 |
| STIM1    | Stromal Interaction Molecule 1                                     | 11 | 3833509   | 4071015   | 237506 | 2058 |
| STK39    | Serine Threonine Kinase 39                                         | 2  | 168518776 | 168812365 | 293590 | 1638 |
| SYK      | Spleen Tyrosine Kinase                                             | 9  | 92603891  | 92700652  | 96762  | 1908 |
| TACR1    | Tachykinin Receptor 1                                              | 2  | 75129738  | 75280122  | 150385 | 1228 |
| TACR2    | Tachykinin Receptor 2                                              | 10 | 70833964  | 70846680  | 12716  | 1197 |
| TACR3    | Tachykinin Receptor 3                                              | 4  | 104730074 | 104860422 | 130348 | 1398 |
| TBXA2R   | Thromboxane A2 Receptor                                            | 19 | 3545504   | 3557658   | 12154  | 1160 |
| TGFB1    | Transforming Growth Factor, Beta 1                                 | 19 | 46528491  | 46551656  | 23165  | 1173 |
| TGFBR1   | Transforming Growth Factor, Beta Receptor 1                        | 9  | 100907233 | 100956295 | 49062  | 1512 |
| TLR4     | Toll-like Receptor 4                                               | 9  | 119506431 | 119519589 | 13158  | 2520 |
| TLR7     | Toll-like Receptor 7                                               | X  | 12795123  | 12818401  | 23278  | 3150 |
| TLR9     | Toll-like Receptor 9                                               | 3  | 52230138  | 52235219  | 5081   | 3099 |
| TNFRSF1A | Tumor Necrosis Factor Receptor Superfamily, Member 1A              | 12 | 6308184   | 6321522   | 13338  | 1368 |
| TNFSF11  | Tumor Necrosis Factor (ligand) Superfamily, Member 11              | 13 | 42034872  | 42080148  | 45277  | 954  |
| TNNI3K   | TNNI3 Interacting Kinase                                           | 1  | 74436535  | 74782696  | 346162 | 2508 |
| TRPC3    | Transient Receptor Potential Cation Channel, Subfamily C, Member 3 | 4  | 123019633 | 123092285 | 72653  | 2547 |
| TRPC6    | Transient Receptor Potential Cation Channel, Subfamily C, Member 6 | 11 | 100827577 | 100959869 | 132293 | 2796 |
| TRPM8    | Transient Receptor Potential Cation Channel, Subfamily M, Member 8 | 2  | 234490782 | 234592905 | 102123 | 3315 |
| TRPV1    | Transient Receptor Potential Cation Channel, Subfamily V, Member 1 | 17 | 3415490   | 3459454   | 43964  | 2519 |
| UTS2R    | Urotensin 2 Receptor                                               | 17 | 77925490  | 77926659  | 1169   | 1170 |
| ZAP70    | Zeta-chain Associated Protein Kinase 70kDa                         | 2  | 97696463  | 97722755  | 26292  | 1860 |

<sup>a</sup>Chromosome positions based on NCBI build 36.3.

**Table S2A.**

Differences in Gene Ontology terms between 202 study genes and the rest of the genome: molecular function.

| GO Term                                  | GENCODE <sup>a</sup> |         | Current Study |         | Diff. | P-value  | Odds Ratio |
|------------------------------------------|----------------------|---------|---------------|---------|-------|----------|------------|
|                                          | Count                | Percent | Count         | Percent |       |          |            |
| G-protein coupled receptor activity      | 383                  | 1.9     | 51            | 25.3    | 23.4  | 4.1E-113 | 17.4       |
| ion channel activity                     | 241                  | 1.2     | 19            | 9.4     | 8.2   | 1.3E-23  | 8.6        |
| receptor activity                        | 1291                 | 6.4     | 72            | 35.6    | 29.3  | 2.2E-60  | 8.1        |
| cytokine activity                        | 165                  | 0.8     | 11            | 5.5     | 4.6   | 2.4E-11  | 7.0        |
| protein heterodimerization activity      | 245                  | 1.2     | 13            | 6.4     | 5.2   | 3.4E-10  | 5.6        |
| receptor binding                         | 254                  | 1.3     | 11            | 5.5     | 4.2   | 9.3E-7   | 4.5        |
| protein homodimerization activity        | 409                  | 2.0     | 15            | 7.4     | 5.4   | 3.5E-7   | 3.9        |
| protein binding                          | 7127                 | 35.0    | 131           | 64.9    | 29.8  | 6.5E-18  | 3.4        |
| protein serine/threonine kinase activity | 515                  | 2.5     | 16            | 7.9     | 5.4   | 5.8E-6   | 3.3        |
| peptidase activity                       | 483                  | 2.4     | 14            | 6.9     | 4.6   | 8.8E-5   | 3.0        |
| protein kinase activity                  | 536                  | 2.6     | 15            | 7.4     | 4.8   | 8.4E-5   | 2.9        |
| nucleic acid binding                     | 1159                 | 5.7     | 1             | 0.5     | -5.2  | 2.3E-3   | 0.08       |

<sup>a</sup>Gene ontology description for all protein coding genes annotated by the GENCODE project.

**Table S2B.**

Differences in Gene Ontology terms between 202 study genes and the rest of the genome: cellular component.

| GO Term                          | GENCODE |         | Current Study |         | Diff. | P-value | Odds Ratio |
|----------------------------------|---------|---------|---------------|---------|-------|---------|------------|
|                                  | Count   | Percent | Count         | Percent |       |         |            |
| external side of plasma membrane | 144     | 0.7     | 17            | 8.4     | 7.7   | 1.3E-32 | 12.8       |
| membrane raft                    | 121     | 0.6     | 14            | 6.9     | 6.3   | 3.4E-26 | 12.3       |
| integral to plasma membrane      | 997     | 4.9     | 74            | 36.6    | 31.7  | 3.8E-88 | 11.1       |
| postsynaptic membrane            | 155     | 0.8     | 15            | 7.4     | 6.7   | 2.5E-23 | 10.3       |
| dendrite                         | 168     | 0.8     | 15            | 7.4     | 6.6   | 2.2E-21 | 9.5        |
| cell surface                     | 269     | 1.3     | 22            | 10.9    | 9.6   | 1.5E-28 | 9.0        |
| neuronal cell body               | 190     | 0.9     | 15            | 7.4     | 6.5   | 1.1E-18 | 8.4        |
| plasma membrane                  | 2939    | 14.5    | 113           | 55.9    | 41.5  | 1.5E-59 | 7.4        |
| membrane fraction                | 522     | 2.6     | 26            | 12.9    | 10.3  | 2.0E-18 | 5.6        |
| synapse                          | 271     | 1.3     | 12            | 5.9     | 4.6   | 1.6E-7  | 4.6        |
| extracellular space              | 748     | 3.7     | 26            | 12.9    | 9.2   | 4.6E-11 | 3.8        |
| cell junction                    | 403     | 2.0     | 14            | 6.9     | 5.0   | 3.0E-6  | 3.6        |
| integral to membrane             | 4471    | 22.0    | 100           | 49.5    | 27.5  | 4.9E-20 | 3.4        |
| endoplasmic reticulum            | 933     | 4.6     | 22            | 10.9    | 6.3   | 5.9E-5  | 2.5        |
| endoplasmic reticulum membrane   | 553     | 2.7     | 13            | 6.4     | 3.7   | 3.1E-3  | 2.4        |
| extracellular region             | 1867    | 9.2     | 34            | 16.8    | 7.7   | 3.8E-4  | 2.0        |

**Table S2C.**

Differences in Gene Ontology terms between 202 study genes and the rest of the genome: biological process.

| GO Term                                                              | GENCODE |         | Current Study |         | Diff. | P-value | Odds Ratio |
|----------------------------------------------------------------------|---------|---------|---------------|---------|-------|---------|------------|
|                                                                      | Count   | Percent | Count         | Percent |       |         |            |
| positive regulation of peptidyl-tyrosine phosphorylation             | 47      | 0.2     | 11            | 5.5     | 5.2   | 1.5E-39 | 24.6       |
| elevation of cytosolic calcium ion concentration                     | 99      | 0.5     | 19            | 9.4     | 8.9   | 1.5E-58 | 21.0       |
| cellular calcium ion homeostasis                                     | 69      | 0.3     | 13            | 6.4     | 6.1   | 7.2E-39 | 20.0       |
| chemotaxis                                                           | 130     | 0.6     | 18            | 8.9     | 8.3   | 1.4E-40 | 15.1       |
| inflammatory response                                                | 245     | 1.2     | 31            | 15.4    | 14.1  | 1.5E-64 | 14.7       |
| response to ethanol                                                  | 80      | 0.4     | 11            | 5.5     | 5.1   | 2.8E-24 | 14.4       |
| calcium ion transport                                                | 124     | 0.6     | 15            | 7.4     | 6.8   | 2.1E-29 | 12.9       |
| cell surface receptor linked signaling pathway                       | 233     | 1.2     | 26            | 12.9    | 11.7  | 2.2E-47 | 12.6       |
| response to lipopolysaccharide                                       | 121     | 0.6     | 12            | 5.9     | 5.4   | 4.2E-19 | 10.4       |
| synaptic transmission                                                | 178     | 0.9     | 17            | 8.4     | 7.5   | 4.2E-26 | 10.3       |
| immune response                                                      | 347     | 1.7     | 29            | 14.4    | 12.7  | 1.2E-38 | 9.6        |
| response to hypoxia                                                  | 166     | 0.8     | 14            | 6.9     | 6.1   | 9.3E-19 | 9.0        |
| G-protein coupled receptor protein signaling pathway                 | 905     | 4.5     | 56            | 27.7    | 23.3  | 5.9E-53 | 8.2        |
| positive regulation of apoptosis                                     | 159     | 0.8     | 12            | 5.9     | 5.2   | 3.2E-14 | 7.9        |
| response to drug                                                     | 281     | 1.4     | 18            | 8.9     | 7.5   | 1.4E-17 | 6.9        |
| positive regulation of cell proliferation                            | 351     | 1.7     | 20            | 9.9     | 8.2   | 6.4E-17 | 6.2        |
| cell-cell signaling                                                  | 250     | 1.2     | 14            | 6.9     | 5.7   | 1.1E-11 | 5.9        |
| protein amino acid phosphorylation                                   | 576     | 2.8     | 24            | 11.9    | 9.1   | 2.3E-13 | 4.6        |
| negative regulation of cell proliferation                            | 324     | 1.6     | 14            | 6.9     | 5.3   | 2.0E-8  | 4.6        |
| ion transport                                                        | 532     | 2.6     | 21            | 10.4    | 7.8   | 6.8E-11 | 4.3        |
| positive regulation of transcription from RNA polymerase II promoter | 375     | 1.8     | 14            | 6.9     | 5.1   | 6.5E-7  | 3.9        |
| signal transduction                                                  | 1309    | 6.4     | 41            | 20.3    | 13.9  | 1.4E-14 | 3.7        |
| cell proliferation                                                   | 326     | 1.6     | 11            | 5.5     | 3.8   | 7.4E-5  | 3.5        |
| apoptosis                                                            | 518     | 2.6     | 16            | 7.9     | 5.4   | 6.5E-6  | 3.3        |
| cell adhesion                                                        | 553     | 2.7     | 15            | 7.4     | 4.7   | 1.4E-4  | 2.8        |
| transport                                                            | 752     | 3.7     | 20            | 9.9     | 6.2   | 1.2E-5  | 2.8        |
| proteolysis                                                          | 477     | 2.4     | 11            | 5.5     | 3.1   | 9.0E-3  | 2.4        |

**Table S3.**

Genotype data quality assessments.

| Validation Experiment              | Measure                  | All variants | Singletons |
|------------------------------------|--------------------------|--------------|------------|
| 130 sample duplicates              | Heterozygote discordance | 0.92%        | 1.5%       |
|                                    | Heterozygote error rate  | 0.50%        | -          |
| Capillary sequence, 245 singletons | False discovery rate     | -            | 2.0%       |
| 1000 Genomes high coverage trios   | Heterozygote discordance | 0.95%        | 0.0%       |
| 30 parent offspring trios          | Mendelian error rate     | 0.06%        | 4.8%       |

**Table S4.**

Overview of sequenced sample collections.

| Collection                                        | Ethnicity | Country <sup>a</sup> | Plated <sup>b</sup> | Sequenced | Passed Quality Control |         |
|---------------------------------------------------|-----------|----------------------|---------------------|-----------|------------------------|---------|
|                                                   |           |                      |                     |           | Count                  | Percent |
| CoLaus                                            | European  | Switzerland          | 2086                | 2064      | 2059                   | 99%     |
| LOLIPOP                                           | European  | United Kingdom       | 549                 | 541       | 541                    | 99%     |
|                                                   | Indian    |                      |                     |           |                        |         |
|                                                   | Asian     | United Kingdom       | 499                 | 497       | 497                    | 100%    |
|                                                   | Other     | United Kingdom       | 285                 | 284       | 284                    | 100%    |
| Metabolic Syndrome (GEMS), Trio <sup>c</sup>      | European  | Canada               | 35                  | 35        | 35                     | 100%    |
|                                                   | European  | Finland              | 45                  | 45        | 45                     | 100%    |
| Metabolic Syndrome (GEMS), Case                   | European  | Australia            | 188                 | 188       | 186                    | 99%     |
|                                                   | European  | Canada               | 283                 | 281       | 280                    | 99%     |
|                                                   | European  | Finland              | 75                  | 75        | 75                     | 100%    |
|                                                   | European  | Switzerland          | 158                 | 158       | 157                    | 99%     |
|                                                   | European  | United States        | 84                  | 84        | 84                     | 100%    |
| Metabolic Syndrome (GEMS), Control                | European  | Australia            | 192                 | 191       | 190                    | 99%     |
|                                                   | European  | Canada               | 253                 | 250       | 250                    | 99%     |
|                                                   | European  | Finland              | 80                  | 80        | 80                     | 100%    |
|                                                   | European  | Switzerland          | 177                 | 177       | 176                    | 99%     |
|                                                   | European  | United States        | 90                  | 90        | 85                     | 94%     |
| Coronary Artery Disease (MedStar)                 | European  | United States        | 609                 | 608       | 604                    | 99%     |
|                                                   | European  | United States        | 609                 | 608       | 604                    | 99%     |
| Osteoarthritis (GOGO)                             | European  | United Kingdom       | 300                 | 298       | 298                    | 99%     |
|                                                   | European  | United States        | 536                 | 534       | 534                    | 100%    |
| Irritable Bowel Syndrome                          | European  | Canada               | 165                 | 165       | 165                    | 100%    |
|                                                   | European  | United States        | 152                 | 152       | 152                    | 100%    |
| Rheumatoid Arthritis Multiple Sclerosis (geneMSA) | European  | United Kingdom       | 615                 | 611       | 611                    | 99%     |
|                                                   | European  | Netherlands          | 158                 | 158       | 158                    | 100%    |
|                                                   | European  | Switzerland          | 176                 | 176       | 175                    | 99%     |
| Multiple Sclerosis, Case                          | European  | United States        | 339                 | 339       | 337                    | 99%     |
|                                                   | African   | United States        | 340                 | 339       | 339                    | 100%    |
| Multiple Sclerosis, Control                       | African   | United States        | 340                 | 339       | 339                    | 100%    |
|                                                   | American  | United States        | 260                 | 254       | 252                    | 97%     |
| Epilepsy (GenEpa)                                 | European  | Switzerland          | 125                 | 125       | 111                    | 89%     |
| Epilepsy (HitDIP)                                 | European  | Finland              | 185                 | 183       | 164                    | 89%     |
| Alzheimer's Disease                               | European  | Canada               | 705                 | 700       | 687                    | 97%     |

| (genADA)                                             |                                                       |                |          |       |       |      |      |
|------------------------------------------------------|-------------------------------------------------------|----------------|----------|-------|-------|------|------|
| Unipolar depression                                  | European                                              | Germany        | 775      | 758   | 741   | 96%  |      |
| Bipolar disorder                                     | European                                              | Canada         | 376      | 376   | 374   | 99%  |      |
|                                                      | European                                              | United Kingdom | 81       | 81    | 80    | 99%  |      |
| Schizophrenia                                        | European                                              | England        | 329      | 329   | 323   | 98%  |      |
|                                                      | European                                              | Canada         | 254      | 254   | 254   | 100% |      |
|                                                      | European                                              | Germany        | 336      | 336   | 330   | 98%  |      |
|                                                      | European                                              | United Kingdom | 221      | 221   | 219   | 99%  |      |
| Chronic Obstructive<br>Pulmonary Disease<br>(HitDIP) | European                                              | United Kingdom | 298      | 298   | 296   | 99%  |      |
|                                                      | European                                              | Norway         | 782      | 781   | 780   | 100% |      |
|                                                      | Chronic Obstructive<br>Pulmonary Disease<br>(ECLIPSE) | European       | Bulgaria | 52    | 52    | 52   | 100% |
|                                                      |                                                       | European       | Canada   | 96    | 96    | 95   | 99%  |
| European                                             |                                                       | Czech Republic | 27       | 27    | 27    | 100% |      |
| European                                             |                                                       | Denmark        | 44       | 44    | 43    | 98%  |      |
| European                                             |                                                       | Netherlands    | 74       | 72    | 71    | 96%  |      |
| European                                             |                                                       | Norway         | 150      | 150   | 148   | 99%  |      |
| European                                             |                                                       | Slovenia       | 74       | 72    | 72    | 97%  |      |
| European                                             |                                                       | Spain          | 32       | 32    | 32    | 100% |      |
| European                                             |                                                       | United Kingdom | 187      | 186   | 185   | 99%  |      |
| European                                             |                                                       | United States  | 266      | 264   | 263   | 99%  |      |
| 1000 Genomes<br>Project                              | European                                              | Nigeria        | 3        | 3     | 3     | 100% |      |
|                                                      | European                                              | United States  | 3        | 3     | 3     | 100% |      |
| Total                                                |                                                       |                | 14204    | 14117 | 14002 | 99%  |      |

<sup>a</sup>Country where subjects were recruited into their respective study.

<sup>b</sup>Count of subject DNA samples that were plated for sequencing.

<sup>c</sup>A total of 30 trios were sequenced, however some trio members are included as cases or controls and hence included in the counts above.

**Table S5A.**

Single nucleotide variants observed in 12,514 European subjects by frequency and class.

|                             | Nonsense<br>Readthrough | NS   | S    | Splice | UTR   | Intron | Flank | Total |
|-----------------------------|-------------------------|------|------|--------|-------|--------|-------|-------|
| Singleton                   | 200                     | 5978 | 3316 | 181    | 8323  | 4870   | 376   | 23244 |
| Doubleton                   | 31                      | 1293 | 874  | 30     | 1927  | 1097   | 87    | 5339  |
| (0.0001,0.001] <sup>a</sup> | 24                      | 1463 | 1089 | 59     | 2623  | 1538   | 93    | 6889  |
| (0.001,0.005]               | 3                       | 196  | 177  | 14     | 478   | 304    | 16    | 1188  |
| (0.005,0.02]                | 0                       | 101  | 92   | 4      | 215   | 131    | 14    | 557   |
| (0.02,0.05]                 | 0                       | 36   | 46   | 1      | 134   | 60     | 3     | 280   |
| (0.05,0.5]                  | 2                       | 105  | 209  | 10     | 414   | 280    | 18    | 1038  |
| Total                       | 260                     | 9172 | 5803 | 299    | 14114 | 8280   | 607   | 38535 |
| Unobserved <sup>b</sup>     | 34                      | 1823 | 1422 | 65     | 3538  | 2106   | 152   | 9140  |

<sup>a</sup>Excludes doubletons that may have MAF up to 0.00016 if 50% of genotypes are missing.

<sup>b</sup>SNVs observed in the overall study but not in 12,514 Europeans.



**Table S5B.**

Single nucleotide variants observed in 594 African American subjects by frequency and class.

|                            | Nonsense<br>Readthrough | NS   | S    | Splice | UTR   | Intron | Flank | Total |
|----------------------------|-------------------------|------|------|--------|-------|--------|-------|-------|
| Singleton                  | 17                      | 905  | 683  | 30     | 1649  | 964    | 69    | 4317  |
| Doubleton                  | 1                       | 173  | 148  | 9      | 420   | 237    | 24    | 1012  |
| (0.002,0.005] <sup>a</sup> | 1                       | 173  | 211  | 10     | 464   | 258    | 20    | 1137  |
| (0.005,0.02]               | 1                       | 198  | 249  | 11     | 648   | 344    | 25    | 1476  |
| (0.02,0.05]                | 2                       | 88   | 139  | 5      | 323   | 171    | 21    | 749   |
| (0.05,0.5]                 | 2                       | 129  | 260  | 10     | 555   | 414    | 20    | 1390  |
| Total                      | 24                      | 1666 | 1690 | 75     | 4059  | 2388   | 179   | 10081 |
| Unobserved <sup>b</sup>    | 270                     | 9329 | 5535 | 289    | 13593 | 7998   | 580   | 37594 |

<sup>a</sup>Excludes doubletons that may have MAF up to 0.0034 if 50% of genotypes are missing.

<sup>b</sup>SNVs observed in the overall study but not in 594 African Americans.

**Table S5C.**

Single nucleotide variants observed in 567 South Asian subjects by frequency and class.

|                            | Nonsense<br>Readthrough | NS   | S    | Splice | UTR   | Intron | Flank | Total |
|----------------------------|-------------------------|------|------|--------|-------|--------|-------|-------|
| Singleton                  | 16                      | 806  | 573  | 25     | 1392  | 844    | 53    | 3709  |
| Doubleton                  | 1                       | 163  | 128  | 2      | 322   | 186    | 14    | 816   |
| (0.002,0.005] <sup>a</sup> | 1                       | 115  | 122  | 4      | 260   | 161    | 13    | 676   |
| (0.005,0.02]               | 2                       | 123  | 120  | 7      | 313   | 172    | 12    | 749   |
| (0.02,0.05]                | 1                       | 41   | 77   | 4      | 149   | 50     | 6     | 328   |
| (0.05,0.5]                 | 1                       | 93   | 202  | 8      | 434   | 303    | 18    | 1059  |
| Total                      | 22                      | 1341 | 1222 | 50     | 2870  | 1716   | 116   | 7337  |
| Unobserved <sup>b</sup>    | 272                     | 9654 | 6003 | 314    | 14782 | 8670   | 643   | 40338 |

<sup>a</sup>Excludes doubletons that may have MAF up to 0.0035 if 50% of genotypes are missing.

<sup>b</sup>SNVs observed in the overall study but not in 567 South Asians.

**Table S6.**

Overlap of variants from Online Mendelian Inheritance in Man (OMIM) with those observed in the current study.

| Variant Number  | Evidence | GENE Variant  | Mode of Inherit | Disease                                               | European |     | Southern Asian |     | African American |     |
|-----------------|----------|---------------|-----------------|-------------------------------------------------------|----------|-----|----------------|-----|------------------|-----|
|                 |          |               |                 |                                                       | MAF      | MAC | MAF            | MAC | MAF              | MAC |
| chr21_26191825  | Low      | GLU665ASP     | Dominant        | ALZHEIMER DISEASE                                     | 8.0E-5   | 2   | 0.0            | 0   | 0.0              | 0   |
| chr21_26185979  | Low      | ALA713THR     | Dominant        |                                                       | 8.0E-5   | 2   | 0.0            | 0   | 0.0              | 0   |
|                 |          | <b>CASR</b>   |                 |                                                       |          |     |                |     |                  |     |
| chr3_123455763  | High     | LEU13PRO      | Recessive       | HYPOCALCIURIC HYPERCALCEMIA                           | 4.0E-5   | 1   | 0.0            | 0   | 0.0              | 0   |
| chr3_123485908  | Medium   | PHE806SER     | Dominant        | HYPOPARATHYROID                                       | 4.0E-5   | 1   | 0.0            | 0   | 0.0              | 0   |
|                 |          | <b>CD3G</b>   |                 |                                                       |          |     |                |     |                  |     |
| chr11_117720349 | Medium   | MET1VAL       | Recessive       | IMMUNODEFICIENCY                                      | 4.0E-5   | 1   | 0.0            | 0   | 0.0              | 0   |
|                 |          | <b>DRD2</b>   |                 |                                                       |          |     |                |     |                  |     |
| chr11_112792867 | Low      | VAL154ILE     | Dominant        | MYOCLONUS-DYSTONIA SYNDROME                           | 4.0E-5   | 1   | 0.0            | 0   | 0.0              | 0   |
|                 |          | <b>EDNRB</b>  |                 |                                                       |          |     |                |     |                  |     |
| chr13_77390541  | High     | GLY57SER      | Recessive       | HIRSCHSPRUNG DISEASE - SUS.                           | 7.8E-3   | 195 | 8.9E-4         | 1   | 8.4E-4           | 1   |
| chr13_77373231  | Medium   | SER305ASN     | Recessive       |                                                       | 1.3E-2   | 321 | 0.0            | 0   | 5.9E-3           | 7   |
|                 |          | <b>GHSR</b>   |                 |                                                       |          |     |                |     |                  |     |
| chr3_173648189  | High     | ARG237TRP     | Recessive       | SHORT STATURE - IDIOPATHIC                            | 2.0E-4   | 5   | 1.8E-3         | 2   | 0.0              | 0   |
|                 |          | <b>LRRK2</b>  |                 |                                                       |          |     |                |     |                  |     |
| chr12_38990503  | High     | ARG1441CYS    | Dominant        | PARKINSON'S DISEASE                                   | 4.0E-5   | 1   | 0.0            | 0   | 8.4E-4           | 1   |
| chr12_39020469  | High     | GLY2019SER    | Dominant        |                                                       | 3.6E-4   | 9   | 0.0            | 0   | 0.0              | 0   |
| chr12_39043595  | High     | GLY2385AR G   | Dominant        |                                                       | 4.0E-5   | 1   | 8.9E-4         | 1   | 0.0              | 0   |
|                 |          | <b>MMP9</b>   |                 |                                                       |          |     |                |     |                  |     |
| chr20_44070974  | Medium   | MET1LYS       | Recessive       | METAPHYSEAL ANADYSPLASIA                              | 8.0E-5   | 2   | 6.2E-3         | 7   | 0.0              | 0   |
|                 |          | <b>PLA2G7</b> |                 |                                                       |          |     |                |     |                  |     |
| chr6_46785057   | High     | VAL279PHE     | Recessive       | PLATELET-ACTIVATING FACTOR ACETYLHYDROLASE DEFICIENCY | 3.4E-4   | 8   | 1.8E-3         | 2   | 0.0              | 0   |
|                 |          | <b>PSENI</b>  |                 |                                                       |          |     |                |     |                  |     |
| chr14_72707406  | High     | ALA79VAL      | Dominant        | ALZHEIMER DISEASE                                     | 4.0E-5   | 1   | 0.0            | 0   | 0.0              | 0   |
| chr14_72723321  | High     | HIS163ARG     | Dominant        |                                                       | 1.2E-4   | 3   | 0.0            | 0   | 0.0              | 0   |
| chr14_72723321  | High     | HIS163TYR     | Dominant        |                                                       | 1.2E-4   | 3   | 0.0            | 0   | 0.0              | 0   |
| chr14_72748272  | High     | ASP333GLY     | Dominant        | CARDIOMYOPATHY - DILATED                              | 0.0      | 0   | 0.0            | 0   | 2.5E-3           | 3   |
|                 |          | <b>PSEN2</b>  |                 |                                                       |          |     |                |     |                  |     |
| chr1_225138141  | Medium   | ALA85VAL      | Dominant        | ALZHEIMER DISEASE                                     | 4.0E-5   | 1   | 0.0            | 0   | 0.0              | 0   |
| chr1_225139894  | High     | SER130LEU     | Dominant        | CARDIOMYOPATHY - DILATED                              | 1.4E-3   | 34  | 0.0            | 0   | 0.0              | 0   |
| chr1_225149872  | Medium   | ASP439ALA     | Dominant        | ALZHEIMER DISEASE                                     | 1.2E-4   | 3   | 0.0            | 0   | 0.0              | 0   |
|                 |          | <b>SCN9A</b>  |                 |                                                       |          |     |                |     |                  |     |
| chr2_166876329  | Low      | ILE62VAL      | Dominant        | FEBRILE CONVULSIONS                                   | 8.1E-5   | 2   | 0.0            | 0   | 0.0              | 0   |
| chr2_166849262  | High     | ASN641TYR     | Dominant        | GENERALIZED EPILEPSY W/ FEBRILE SEIZURES              | 4.0E-5   | 1   | 0.0            | 0   | 0.0              | 0   |
| chr2_166846542  | High     | LYS655ARG     | Dominant        | ERYTHERMALGIA                                         | 2.4E-3   | 59  | 0.0            | 0   | 2.5E-3           | 3   |
| chr2_166842007  | High     | LEU858HIS     | Dominant        | PAROXYSMAL EXTREME PAIN DISORDER                      | 4.0E-5   | 1   | 0.0            | 0   | 0.0              | 0   |
|                 |          | <b>SDHB</b>   |                 |                                                       |          |     |                |     |                  |     |
| chr1_17253094   | High     | ALA3GLY       | Dominant        | COWDEN-LIKE SYNDROME                                  | 1.7E-4   | 4   | 0.0            | 0   | 4.2E-2           | 49  |
| chr1_17227710   | Medium   | HIS132PRO     | Dominant        | PARAGANGLIOMAS                                        | 4.0E-5   | 1   | 0.0            | 0   | 0.0              | 0   |

|                   |        |            |           |                                      |        |     |        |    |        |   |
|-------------------|--------|------------|-----------|--------------------------------------|--------|-----|--------|----|--------|---|
| chr1_17226884     | High   | SER163PRO  | Dominant  | COWDEN-LIKE SYNDROME                 | 1.5E-2 | 364 | 1.5E-2 | 17 | 3.4E-3 | 4 |
| chr1_17221730     | High   | ARG242HIS  | Dominant  | PARAGANGLIOMAS 4 PHEOCHROMOCYTOMA    | 0.0    | 0   | 0.0    | 0  | 8.4E-4 | 1 |
| chr11_111463887   | High   | HIS50ARG   | Dominant  | CARCINOID TUMORS                     | 8.6E-3 | 215 | 2.7E-3 | 3  | 0.0    | 0 |
| chr11_111464873   | High   | PRO81LEU   | Dominant  | PARAGANGLIOMAS 1 PHEOCHROMOCYTOMA    | 4.0E-5 | 1   | 0.0    | 0  | 0.0    | 0 |
| chr13_102499774_A | Medium | THR262 MET | Recessive | BILE ACID MALABSORPTION - PRIMARY    | 2.4E-4 | 6   | 8.8E-4 | 1  | 8.4E-4 | 1 |
| chr17_25562500    | High   | ILE425VAL  |           | OBSESSIVE-COMPULSIVE DISORDER - SUS. | 8.8E-4 | 22  | 0.0    | 0  | 1.7E-3 | 2 |
| chr4_104860004    | Medium | GLY93ASP   | Recessive | HYPOGONADOTROPIC HYPOGONADISM        | 0.0    | 0   | 0.0    | 0  | 0.0    | 0 |

<sup>a</sup>MAF: minor allele frequency.

<sup>b</sup>MAC: minor allele count.

**Table S7.**

Sample sizes and summary statistics for case-control analyses.

| Study                       | Case:<br>Control<br>Ratio | Cases | Controls | Genetic<br>Distance <sup>a</sup> | Inflation $\lambda^b$ |               |            |
|-----------------------------|---------------------------|-------|----------|----------------------------------|-----------------------|---------------|------------|
|                             |                           |       |          |                                  | Common                | Amino<br>Acid | Functional |
| Alzheimer's                 | 1:10                      | 649   | 6490     | 0.018                            | 1.09                  | 1.16          | 1.08       |
| Bipolar Disorder            | 1:6                       | 778   | 4667     | 0.018                            | 1.01                  | 1.32          | 1.08       |
| COPD                        | 1:6                       | 947   | 5682     | 0.017                            | 1.18                  | 1.41          | 1.41       |
| Coronary Artery Disease     | 1:8                       | 604   | 4832     | 0.018                            | 1.19                  | 1.28          | 1.03       |
| Dyslipidemia                | 1:1                       | 769   | 769      | N/A                              | 1.07                  | 1.50          | 1.20       |
| Epilepsy                    | 1:50                      | 120   | 6000     | 0.017                            | 1.09                  | 1.31          | 1.43       |
| Irritable Bowel<br>Syndrome | 1:12                      | 314   | 3768     | 0.014                            | 1.26                  | 1.40          | 1.39       |
| Multiple Sclerosis          | 1:10                      | 642   | 6420     | 0.019                            | 1.12                  | 1.01          | 0.99       |
| Osteoarthritis              | 1:6                       | 798   | 4788     | 0.019                            | 2.18                  | 1.51          | 1.62       |
| Rheumatoid Arthritis        | 1:6                       | 608   | 3648     | 0.019                            | 1.31                  | 1.83          | 1.32       |
| Schizophrenia               | 1:4                       | 1066  | 4264     | 0.018                            | 1.12                  | 1.63          | 1.28       |
| Unipolar Depression         | 1:6                       | 718   | 4308     | 0.020                            | 1.35                  | 1.32          | 1.54       |

<sup>a</sup>Median Euclidean genetic distance between cases and controls<sup>b</sup>Genomic control  $\lambda$  for common variant and aggregate rare variant tests, including all amino acid-changing variants and just those predicted to be functional by PolyPhen or SIFT, or occurring at evolutionarily conserved bases.

**Table S8.**

Overlap of genes and disease traits with NHGRI GWAS Catalog.

| Study Trait             | Gene                   | NHGRI Reported Trait                  | NHGRI Reported Gene | Reference    |
|-------------------------|------------------------|---------------------------------------|---------------------|--------------|
| Bipolar Disorder        | <i>CNTN5</i>           | Bipolar disorder and schizophrenia    | <i>CNTN5</i>        | (77)         |
| Schizophrenia           | <i>CNTN5</i>           | Bipolar disorder and schizophrenia    | <i>CNTN5</i>        | (77)         |
| COPD                    | <i>HHIP</i>            | Chronic obstructive pulmonary disease | <i>HHIP</i>         | (49, 78)     |
| Coronary Artery Disease | <i>OPRM1</i>           | Coronary heart disease                | <i>OPRM1</i>        | (79)         |
| Unipolar Depression     | <i>RORA</i>            | Depression--quantitative trait        | <i>RORA</i>         | (80)         |
| Unipolar Depression     | <i>ITGB1</i>           | Depression--quantitative trait        | <i>ITGB1</i>        | (80)         |
| Multiple Sclerosis      | <i>TNFRSF1A</i>        | Multiple sclerosis                    | <i>TNFRSF1A</i>     | (81)         |
| Multiple Sclerosis      | <i>IL6<sup>a</sup></i> | N/A                                   | N/A                 | (76)         |
| Multiple Sclerosis      | <i>IL7R</i>            | Multiple sclerosis                    | <i>IL7R</i>         | (76, 81, 82) |
| Multiple Sclerosis      | <i>EVI5</i>            | Multiple sclerosis                    | <i>EVI5, RPL5</i>   | (82, 83)     |
| Multiple Sclerosis      | <i>CLEC16A</i>         | Multiple sclerosis                    | <i>CLEC16A</i>      | (81, 82)     |
| Schizophrenia           | <i>PTGS2</i>           | Schizophrenia                         | Intergenic          | (84)         |
| Coronary Artery Disease | <i>CHRNA5</i>          | Sudden cardiac arrest                 | <i>CHRNA4</i>       | (85)         |
| Coronary Artery Disease | <i>CHRNA3</i>          | Sudden cardiac arrest                 | <i>CHRNA4</i>       | (85)         |

<sup>a</sup>The association between *IL6* and multiple sclerosis reported in reference (76) was not included in the NHGRI GWAS catalog due to stringent significance criteria. As this was one of the top-associated genes in that report ( $p = 5.9 \times 10^{-8}$ ; more significant than *IL7R* and several other associations reported in this table) and it overlaps with the current study, we include it here.

**Table S9.**

Statistically significant rare variant associations resulting from GWAS candidate gene analysis.

| Study               | GENE            | Test                  | MAF <sup>a</sup> | Carrier/Noncarrier<br>Count |       | P-value <sup>b</sup> |          | Odds<br>Ratio | (95% CI)   |
|---------------------|-----------------|-----------------------|------------------|-----------------------------|-------|----------------------|----------|---------------|------------|
|                     |                 |                       |                  | Controls                    | Cases | Unadjusted           | Adjusted |               |            |
| Multiple Sclerosis  | <i>IL6</i>      | Functionally Damaging | 0.0006           | 4/6393                      | 4/635 | 0.0014               | 0.0071   | 12.3          | (3.1,49.8) |
| Multiple Sclerosis  | <i>IL6</i>      | Amino Acid Changing   | 0.0015           | 15/6382                     | 6/633 | 0.0043               | 0.0215   | 4.9           | (1.9,12.9) |
| Multiple Sclerosis  | <i>TNFRSF1A</i> | Amino Acid Changing   | 0.0023           | 25/6372                     | 8/631 | 0.0056               | 0.0277   | 3.6           | (1.6,8.2)  |
| Unipolar Depression | <i>ITGB1</i>    | Amino Acid Changing   | 0.0044           | 42/4251                     | 2/716 | 0.0240               | 0.0481   | 0.3           | (0.1,1.1)  |

<sup>a</sup>Cumulative minor allele frequency in cases and controls.

<sup>b</sup>P-value adjusted for the number of candidate genes for each disease (see Supplementary Table X).

**Table S10.**

Sample sizes for population genetic and geographic analyses.

|                      | # individuals sampled | # chromosomes in frequency spectra <sup>a</sup> |
|----------------------|-----------------------|-------------------------------------------------|
| African-American     | 594                   | 1,168                                           |
| Southern Asia        | 567                   | 1,068                                           |
| Europe               | 12,514                | 22,000                                          |
| North-Western Europe | 2,489                 | 4,546                                           |
| North European       | 963                   | 1,838                                           |
| Finland              | 261                   | 474                                             |
| Western Europe       | 1,625                 | 3,006                                           |
| Central Europe       | 946                   | 1,734                                           |
| Eastern Europe       | 263                   | 482                                             |
| South-Western Europe | 289                   | 532                                             |
| South-Eastern Europe | 370                   | 688                                             |

<sup>a</sup>All samples were down-sampled to retain 80% of all targeted sites, except for the European continental sample, where the number was rounded down to an even number (84.6% of all sites retained).



**Table S11.**

Single-nucleotide variant transition:transversion ratios.

|               | All Variants | Singletons | Doubletons | MAF > 0.1% and<br>Missing < 10% |
|---------------|--------------|------------|------------|---------------------------------|
| Nonsynonymous | 2.10         | 1.90       | 2.57       | 2.25                            |
| Synonymous    | 4.79         | 4.25       | 5.23       | 5.20                            |
| UTR           | 2.00         | 1.82       | 2.29       | 2.45                            |
| Intron        | 2.04         | 1.97       | 2.22       | 2.15                            |

**Table S12.**

Discordant genotypes and rates observed in 130 sample duplicates.

| Sample 1<br>Genotype               | Sample 2 Genotype <sup>a</sup> |        |        | Discordance Rate |              |
|------------------------------------|--------------------------------|--------|--------|------------------|--------------|
|                                    | 0                              | 1      | 2      | Overall          | Heterozygote |
| All variant positions (N = 44,230) |                                |        |        |                  |              |
| 0                                  | 5,169,859                      | 313    | 0      | 7.05E-5          | 9.23E-3      |
| 1                                  |                                | 39,625 | 56     |                  |              |
| 2                                  |                                |        | 24,418 |                  |              |
| Variants in dbSNP (N = 2,641)      |                                |        |        |                  |              |
| 0                                  | 257,216                        | 146    | 0      | 6.22E-4          | 5.38E-3      |
| 1                                  |                                | 36,573 | 52     |                  |              |
| 2                                  |                                |        | 24,308 |                  |              |
| Variants not in dbSNP (N = 41,589) |                                |        |        |                  |              |
| 0                                  | 4,912,643                      | 167    | 0      | 3.48E-5          | 5.31E-2      |
| 1                                  |                                | 3,051  | 4      |                  |              |
| 2                                  |                                |        | 110    |                  |              |
| Singleton variants (N = 25477)     |                                |        |        |                  |              |
| 0                                  | 2,949,160                      | 3      | 0      | 1.02E-6          | 1.45E-2      |
| 1                                  |                                | 204    | 0      |                  |              |
| 2                                  |                                |        | 0      |                  |              |

<sup>a</sup>Sample genotypes are categorized as 0, 1 and 2 corresponding to reference homozygote, heterozygote or non-reference homozygote, respectively. As duplicate sample order is arbitrary, all discordant genotype counts are presented in the upper triangle.

**Table S13.**

Genotype error rate estimates based on duplicate discordance assuming a single-allele error model.

| Observed<br>Genotype               | True Genotype <sup>a</sup> |         |          |
|------------------------------------|----------------------------|---------|----------|
|                                    | 0                          | 1       | 2        |
| All variant positions (N = 44,230) |                            |         |          |
| 0                                  | 1.00E+00                   | 3.94E-3 | 0.00E+00 |
| 1                                  | 2.36E-11                   | 9.95E-1 | 8.34E-5  |
| 2                                  | 0.00E+00                   | 6.48E-4 | 1.00E+00 |
| Total Error Rate                   | 2.36E-11                   | 4.59E-3 | 8.34E-5  |
| Variants in dbSNP (N = 2,641)      |                            |         |          |
| 0                                  | 1.00E+00                   | 1.36E-3 | 0.00E+00 |
| 1                                  | 9.09E-5                    | 9.98E-1 | 7.48E-5  |
| 2                                  | 0.00E+00                   | 6.56E-4 | 1.00E+00 |
| Total Error Rate                   | 9.09E-5                    | 2.02E-3 | 7.48E-5  |
| Variants not in dbSNP (N = 41,589) |                            |         |          |
| 0                                  | 1.00E+00                   | 2.67E-2 | 0.00E+00 |
| 1                                  | 4.65E-21                   | 9.73E-1 | 1.73E-6  |
| 2                                  | 0.00E+00                   | 6.27E-4 | 1.00E+00 |
| Total Error Rate                   | 4.65E-21                   | 2.73E-2 | 1.73E-6  |

<sup>a</sup>Sample genotypes are categorized as 0, 1 and 2 corresponding to reference homozygote, heterozygote or non-reference homozygote, respectively.

**Table S14.**

Discordant genotypes and rates observed comparing genotypes from current study to two 1000 Genomes Project deep sequenced trios.

| Genotype             | 1000 Genomes Genotype <sup>a</sup> |      |     | Discordance Rate |              |
|----------------------|------------------------------------|------|-----|------------------|--------------|
|                      | 0                                  | 1    | 2   | Overall          | Heterozygote |
| CEU and YRI combined |                                    |      |     |                  |              |
| 0                    | 1900                               | 12   | 0   | 4.21E-3          | 9.52E-3      |
| 1                    | 3                                  | 1769 | 2   |                  |              |
| 2                    | 0                                  | 0    | 349 |                  |              |
| CEU trio             |                                    |      |     |                  |              |
| 0                    | 932                                | 4    | 0   | 3.18E-3          | 7.44E-3      |
| 1                    | 2                                  | 800  | 0   |                  |              |
| 2                    | 0                                  | 0    | 146 |                  |              |
| YRI trio             |                                    |      |     |                  |              |
| 0                    | 968                                | 8    | 0   | 5.11E-3          | 1.12E-2      |
| 1                    | 1                                  | 969  | 2   |                  |              |
| 2                    | 0                                  | 0    | 203 |                  |              |

<sup>a</sup>Sample genotypes are categorized as 0, 1 and 2 corresponding to reference homozygote, heterozygote or non-reference homozygote, respectively.

**Table S15.**

Influence of coding length, GC content and average phyloP on measures of nonsynonymous gene diversity and mutation among genes.

| Response                               | Common NS |        | Rare NS |        | cMAF     |        | Mutation Rate |        |
|----------------------------------------|-----------|--------|---------|--------|----------|--------|---------------|--------|
|                                        | $\beta$   | $p^b$  | $\beta$ | p      | $\beta$  | p      | $\beta$       | p      |
| (intercept)                            | 0.1918    |        | 3.557   |        | 4.81E-4  |        | 1.29E-8       |        |
| Coding Length                          | 0.000062  | 3.2E-8 | 0.0246  | <1e-15 | 3.26E-6  | <1e-15 | 6.27E-13      | 0.11   |
| $r^2$                                  | 0.15      |        | 0.71    |        | 0.53     |        | 0.013         |        |
| Coding Length<br>Adjusted <sup>a</sup> |           |        |         |        |          |        |               |        |
| (intercept)                            | 0.00241   |        | 0.0211  |        | 2.06E-6  |        | 4.88E-9       |        |
| GC Content                             | -0.00021  | 0.65   | 0.0334  | 2.2E-5 | -2.82E-7 | 0.63   | 1.82E-8       | 1.9E-3 |
| phyloP                                 | -0.00122  | 9.0E-7 | -0.0095 | 9.8E-8 | 8.32E-7  | 0.01   | -3.40E-10     | 0.75   |
| $r^2$                                  | 0.12      |        | 0.2     |        | 0.03     |        | 0.05          |        |

<sup>a</sup>Mutation rate was not adjusted for coding length, all other response variables were divided by length of successfully sequenced coding regions

<sup>b</sup>P values computed by likelihood ratio F test (complete versus reduced model)

**Table S16.**

Annotation nonsynonymous SNVs by PolyPhen and SIFT as a function of allele frequency in 12,514 Europeans.

|               | PolyPhen |                   |                   | Tolerated | SIFT <sup>a</sup>   |          |
|---------------|----------|-------------------|-------------------|-----------|---------------------|----------|
|               | Benign   | Possibly Damaging | Probably Damaging |           | Damaging (Low Conf) | Damaging |
| Singleton     | 3532     | 1248              | 1089              | 2937      | 763                 | 2371     |
| Doubleton     | 807      | 253               | 212               | 680       | 160                 | 469      |
| (0,0.001]     | 857      | 311               | 258               | 779       | 202                 | 510      |
| (0.001,0.005] | 127      | 39                | 21                | 121       | 18                  | 56       |
| (0.005,0.05]  | 96       | 23                | 13                | 86        | 12                  | 41       |
| (0.05,0.5]    | 64       | 21                | 5                 | 85        | 10                  | 11       |

<sup>a</sup>Predictions are based on SIFT score as tolerated (score > 0.05), damaging with low confidence warning (score ≤ 0.05), and damaging (score ≤ 0.05).

**Table S17.**

Correspondence between PolyPhen and SIFT predictions of nonsynonymous SNVs in Europeans.

| SIFT                | PolyPhen |                   |                   |
|---------------------|----------|-------------------|-------------------|
|                     | Benign   | Possibly Damaging | Probably Damaging |
| Tolerated           | 4593     | 642               | 218               |
| Damaging (Low Conf) | 457      | 391               | 291               |
| Damaging            | 1483     | 1199              | 1345              |

### **Additional Data table S1 (separate file)**

Target regions of sequenced genes. The column names and a brief description, where needed, are given below.

Gene – RefSeq build 36 gene name  
Gene37 – RefSeq build 37 gene name  
Chromosome  
Exon.NCBI.36.Start – Exon start position  
Exon.NCBI.36.Stop – Exon stop position  
Exon.plus.50.bp.flanking.sequence.NCBI.36.Start – Target start position  
Exon.plus.50.bp.flanking.sequence.NCBI.36.Stop – Target stop position  
Entrez.Gene.ID  
Transcript – Entrez transcript ID  
Ensembl.Gene.ID  
Ensembl.Transcript.ID  
code – Number of coding bases in target region  
utr – Number of UTR bases in target region  
intron – Number of intronic bases in target region  
upstream – Number of upstream bases in target region  
downstream – Number of downstream bases in target region  
code.cover – Corresponding bases with at least 50% genotypes called  
utr.cover  
intron.cover  
upstream.cover  
downstream.cover  
TargetLength – Total target length  
CoverLength – Total target length with at least 50% of genotypes called



### **Additional Data table S2 (separate file)**

Variants and their annotations. The column names and a brief description, where needed, are given below.

VARIANT\_ID – Variant ID: NCBI build 36 chromosome, position and minor allele (if multi-allelic)  
RSID – RefSNP ID  
CHROMOSOME  
POSITION  
GENE – RefSeq build 36 gene name  
REF\_ALLELE – Reference allele  
REF\_ALLELE\_COUNT – Count of observed alleles  
VARIANT – Non-reference allele  
VARIANT\_COUNT – Count of observed alleles  
MISSING – Fraction of missing genotypes  
FEATURE – Variant feature  
UP\_ID – UniProt ID  
UNIPROT\_POSITION  
AA1 – Reference amino acid  
AA2 – Non-reference amino acid  
MINOR\_ALLELE – Which allele has frequency less than 0.5 in full resequenced sample  
MINOR\_ALLELE\_COUNT – Minor allele count  
MULTI\_ALLELE – Which allele this is observed at this base position in descending frequency  
HOM\_N – Number of major homozygote genotypes observed  
HOM\_DEPTH\_AVG – Major homozygote average depth  
HOM\_Q\_AVG – Major homozygote average consensus quality  
HET\_N – Number of heterozygote genotypes observed  
HET\_DEPTH\_AVG – Heterozygote average depth  
HET\_Q\_AVG – Heterozygote average consensus quality  
Eur.MA\_COUNT – Minor allele count in Europeans  
Eur.NOBS – Number of genotypes observed in Europeans  
Eur.FREQ – European minor allele frequency (minor allele defined in full sample)  
Europe.W.FREQ – Western European  
Europe.W.NOBS  
Europe.C.FREQ – Central European  
Europe.C.NOBS  
Europe.SW.FREQ – Southwestern European  
Europe.SW.NOBS  
Europe.S.FREQ – Southern European  
Europe.S.NOBS  
Europe.SE.FREQ – Southeastern European  
Europe.SE.NOBS  
Europe.E.FREQ – Eastern European  
Europe.E.NOBS  
Europe.NW.FREQ – Northwestern European

Europe.NW.NOBS  
Europe.N.FREQ – Northern European  
Europe.N.NOBS  
Finnish.FREQ – Finnish  
Finnish.NOBS  
African\_American.MA\_COUNT  
African\_American.NOBS  
African\_American.FREQ  
UN\_Southern\_Asia.MA\_COUNT  
UN\_Southern\_Asia.NOBS  
UN\_Southern\_Asia.FREQ  
POLYPHEN\_PREDICTION – PolyPhen prediction for nonsynonymous variants  
PSIC – PolyPhen position-specific independent counts  
SIFT\_PREDICTION – SIFT prediction  
SIFT\_SCORE – SIFT score  
PHYLOP – phyloP score based on 46-way placental alignment  
CHROMOSOME

**Additional Data table S3 (separate file)**

Folded site frequency spectra of all four-fold degenerate sites for the 188 autosomal genes used for the demographic inference. The spectra were calculated for a sample of 11,000 Europeans as detailed. One column corresponds to each gene and one row for each minor allele bin count.

## Reference List

1. J. K. Pritchard, *Am J Hum Genet* **69**, 124 (2001).
2. G. V. Kryukov, L. A. Pennacchio, S. R. Sunyaev, *Am. J. Hum. Genet.* **80**, 727 (2007).
3. G. T. Marth *et al.*, *Genome Biol.* **12**, R84 (2011).
4. T. A. Manolio *et al.*, *Nature* **461**, 747 (2009).
5. E. E. Eichler *et al.*, *Nat. Rev. Genet.* **11**, 446 (2010).
6. J. Asimit, E. Zeggini, *Annu. Rev. Genet.* **44**, 293 (2010).
7. S. Gravel *et al.*, *Proc. Natl. Acad. Sci. U. S. A* **108**, 11983 (2011).
8. A. Coventry *et al.*, *Nat. Commun.* **1**, 131 (2010).
9. T. Ohta, *Nature* **246**, 96 (1973).
10. S. H. Williamson *et al.*, *Proc. Natl. Acad. Sci. U. S. A* **102**, 7882 (2005).
11. H. J. Muller, *Am. J. Hum. Genet.* **2**, 111 (1950).
12. A. P. Russ, S. Lampel, *Drug Discov. Today* **10**, 1607 (2005).
13. See supporting material at Science online. (2012).
  
14. M. A. Jobling, M. Hurles, C. Tyler-Smith, *Human Evolutionary Genetics: Origins, Peoples and Disease* (Garland Science, 2003).
15. M. Livi-Bacci, *A concise history of world population* (Wiley-Blackwell, ed. 2, 2007), pp. 1-250.
16. J. Wakeley, T. Takahashi, *Mol. Biol. Evol.* **20**, 208 (2003).
17. P. Awadalla *et al.*, *Am. J. Hum. Genet.* **87**, 316 (2010).
18. D. F. Conrad *et al.*, *Nat. Genet.* **43**, 712 (2011).
19. P. W. Messer, *Genetics* **182**, 1219 (2009).
20. A. L. Price *et al.*, *Am. J. Hum. Genet.* **86**, 832 (2010).
21. I. K. Kotowski *et al.*, *Am. J. Hum. Genet.* **78**, 410 (2006).
22. L. A. Hindorff *et al.*, *Proc. Natl. Acad. Sci. U. S. A* **106**, 9362 (2009).
23. E. Salmela *et al.*, *PLoS. One.* **3**, e3519 (2008).
24. C. D. Bustamante, E. G. Burchard, F. M. De la Vega, *Nature* **475**, 163 (2011).
25. O. Lao *et al.*, *Curr. Biol.* **18**, 1241 (2008).
26. E. S. Lander, N. J. Schork, *Science* **265**, 2037 (1994).
27. J. M. Akey *et al.*, *PLoS. Biol.* **2**, e286 (2004).
28. SeattleSNPs. <http://pga.gs.washington.edu>. (2012).
29. N. Ahituv *et al.*, *Am. J. Hum. Genet.* **80**, 779 (2007).
30. R. M. Durbin *et al.*, *Nature* **467**, 1061 (2010).
31. M. Firmann *et al.*, *BMC. Cardiovasc. Disord.* **8**, 6 (2008).
32. M. Preisig *et al.*, *BMC. Psychiatry* **9**, 9 (2009).
33. J. S. Kooner *et al.*, *Nat. Genet.* **40**, 149 (2008).
34. H. Ling *et al.*, *Obesity. (Silver. Spring)* **17**, 737 (2009).
35. D. F. Wyszynski *et al.*, *Am. J. Cardiol.* **95**, 194 (2005).
36. T. L. Assimes *et al.*, *J. Am. Coll. Cardiol.* **56**, 1552 (2010).
37. V. B. Kraus *et al.*, *Osteoarthritis. Cartilage.* **15**, 120 (2007).
38. C. Vignal *et al.*, *Arthritis Rheum.* **60**, 53 (2009).

39. S. E. Baranzini *et al.*, *Hum. Mol. Genet.* **18**, 767 (2009).
40. J. R. Oksenberg *et al.*, *Am. J. Hum. Genet.* **74**, 160 (2004).
41. B. A. Cree *et al.*, *Arch. Neurol.* **66**, 226 (2009).
42. N. Patterson *et al.*, *Am. J. Hum. Genet.* **74**, 979 (2004).
43. E. L. Heinzen *et al.*, *Am. J. Hum. Genet.* **86**, 707 (2010).
44. D. Kasperaviciute *et al.*, *Brain* **133**, 2136 (2010).
45. H. Li *et al.*, *Arch. Neurol.* **65**, 45 (2008).
46. P. Muglia *et al.*, *Mol. Psychiatry* **15**, 589 (2010).
47. C. Francks *et al.*, *Mol. Psychiatry* **15**, 319 (2010).
48. J. Vestbo *et al.*, *Eur. Respir. J.* **31**, 869 (2008).
49. S. G. Pillai *et al.*, *PLoS. Genet.* **5**, e1000421 (2009).
50. T. T. Ashburn, K. B. Thor, *Nat. Rev. Drug Discov.* **3**, 673 (2004).
51. Y. A. Lussier, J. L. Chen, *Sci. Transl. Med.* **3**, 96ps35 (2011).
52. J. Harrow *et al.*, *Genome Biol.* **7 Suppl 1**, S4 (2006).
53. M. Ashburner *et al.*, *Nat. Genet.* **25**, 25 (2000).
54. R. Li, Y. Li, K. Kristiansen, J. Wang, *Bioinformatics.* **24**, 713 (2008).
55. R. Li *et al.*, *Genome Res.* **19**, 1124 (2009).
56. I. M. Heid *et al.*, *Am. J. Epidemiol.* **168**, 878 (2008).
57. I. W. Saunders, J. Brohede, G. N. Hannan, *Genomics* **90**, 291 (2007).
58. R. Ihaka, R. Gentleman, *Journal of Computational and Graphical Statistics* **5**, 299--314 (1996).
59. V. Ramensky, P. Bork, S. Sunyaev, *Nucleic Acids Res.* **30**, 3894 (2002).
60. P. C. Ng, S. Henikoff, *Genome Res.* **11**, 863 (2001).
61. A. Stabenau *et al.*, *Genome Res.* **14**, 929 (2004).
62. A. Siepel *et al.*, *Genome Res.* **15**, 1034 (2005).
63. R. Blekhman *et al.*, *Curr. Biol.* **18**, 883 (2008).
64. D. G. MacArthur, C. Tyler-Smith, *Hum. Mol. Genet.* **19**, R125 (2010).
65. Z. A. Szpiech, M. Jakobsson, N. A. Rosenberg, *Bioinformatics.* **24**, 2498 (2008).
66. G. A. Watterson, *Theor. Popul. Biol.* **7**, 256 (1975).
67. I. Ebersberger, D. Metzler, C. Schwarz, S. Paabo, *Am. J. Hum. Genet.* **70**, 1490 (2002).
68. M. W. Nachman, S. L. Crowell, *Genetics* **156**, 297 (2000).
69. S. F. Schaffner *et al.*, *Genome Res.* **15**, 1576 (2005).
70. L. Excoffier, M. Foll, *Bioinformatics.* **27**, 1332 (2011).
71. A. J. Coffey *et al.*, *Eur. J. Hum. Genet.* **19**, 827 (2011).
72. M. R. Nelson *et al.*, *Am. J. Hum. Genet.* (2008).
73. S. A. Bacanu, J. C. Whittaker, M. R. Nelson, *Pharmacogenomics. J.* **12**, 93 (2012).
74. S. Hunter *et al.*, *Nucleic Acids Res.* **37**, D211 (2009).
75. J. A. Blake, C. J. Bult, J. A. Kadin, J. E. Richardson, J. T. Eppig, *Nucleic Acids Res.* **39**, D842 (2011).
76. J. H. Wang *et al.*, *Genome Med.* **3**, 3 (2011).
77. K. S. Wang, X. F. Liu, N. Aragam, *Schizophr. Res.* **124**, 192 (2010).
78. M. H. Cho *et al.*, *Nat. Genet.* **42**, 200 (2010).
79. G. Lettre *et al.*, *PLoS. Genet.* **7**, e1001300 (2011).
80. A. Terracciano *et al.*, *Biol. Psychiatry* **68**, 811 (2010).
81. P. L. De Jager *et al.*, *Nat. Genet.* **41**, 776 (2009).
82. D. A. Hafler *et al.*, *N. Engl. J. Med.* **357**, 851 (2007).

83. *Nat. Genet.* **41**, 824 (2009).
84. P. F. Sullivan *et al.*, *Mol. Psychiatry* **13**, 570 (2008).
85. B. E. Aouizerat *et al.*, *BMC. Cardiovasc. Disord.* **11**, 29 (2011).
